# Supplementary material for: Mapping the transcriptional diversity of genetically and anatomically defined cell populations in the mouse brain
Source: eLife journal article supplement (doi:10.7554/elife.38619), 2019-04-12

## A Top 1000 FCR PANTHER enrichment

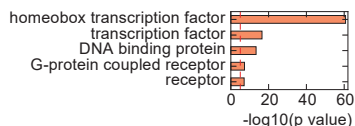

## B Top 1000 DEF PANTHER enrichment

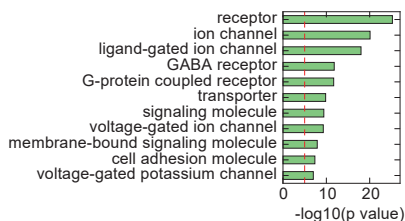

## C Top1000 FCR GOM enrichment

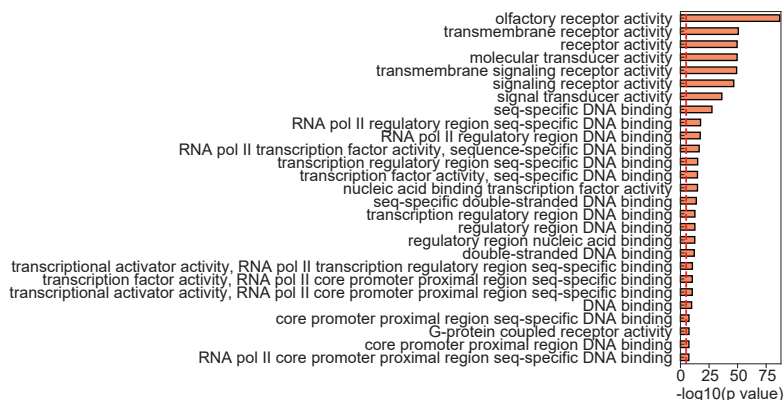

## D Top1000 DEF GOM enrichment

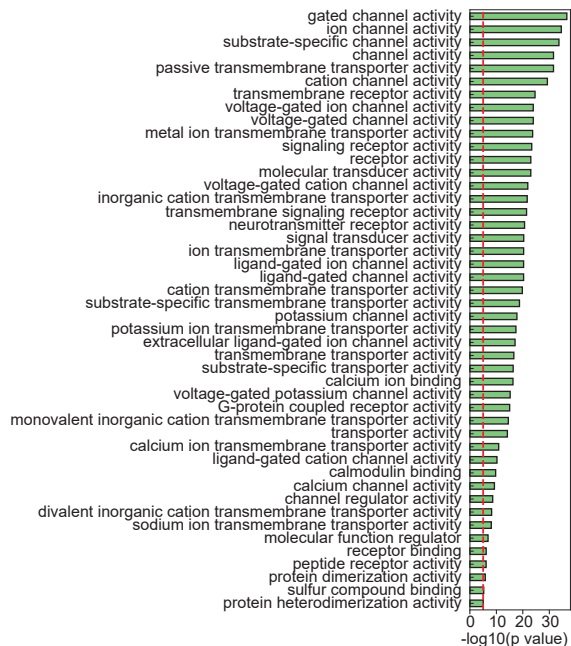

Supplement: supp [file elife-38619-supp-v1.zip]
