# Supplementary material for: Mapping the transcriptional diversity of genetically and anatomically defined cell populations in the mouse brain
Source: eLife journal article supplement (doi:10.7554/elife.38619), 2019-04-12

A

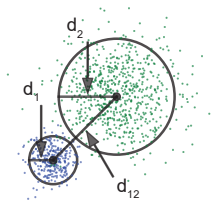

$$\text{separability} = \frac{d_{12}}{d_1 + d_2}$$

$$d_i = \text{mean} + 3\sigma$$

B

Separability of clusters

Tasic 2018

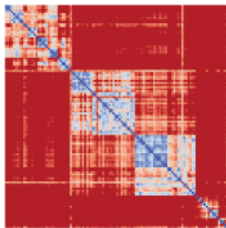

Zeisel 2018

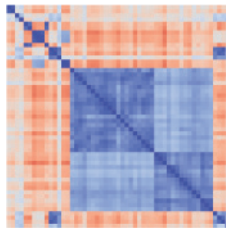

NeuroSeq

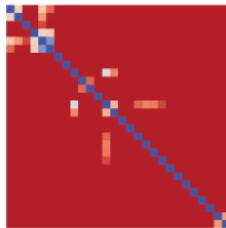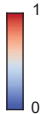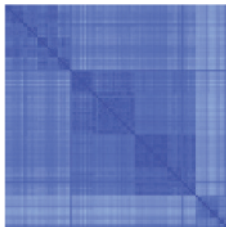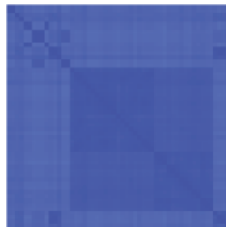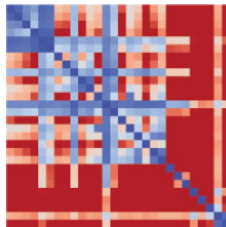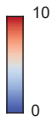

Supplement: supp [file elife-38619-supp-v1.zip]
