# Supplementary material for: Mapping the transcriptional diversity of genetically and anatomically defined cell populations in the mouse brain
Source: eLife journal article supplement (doi:10.7554/elife.38619), 2019-04-12

Tasic 2016 Cre Line Average Profile Decomposed  
by Tasic 2016 Averaged Cluster Profiles

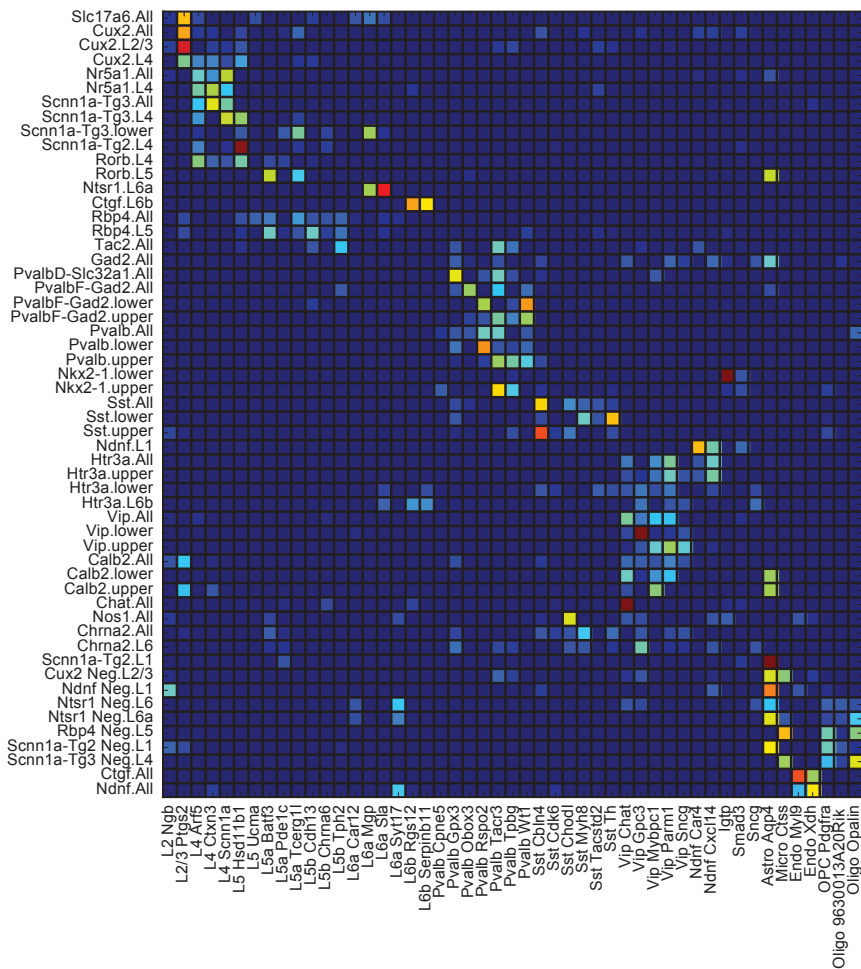

Tasic 2016 Cre Line Cell type Assignment Ratio

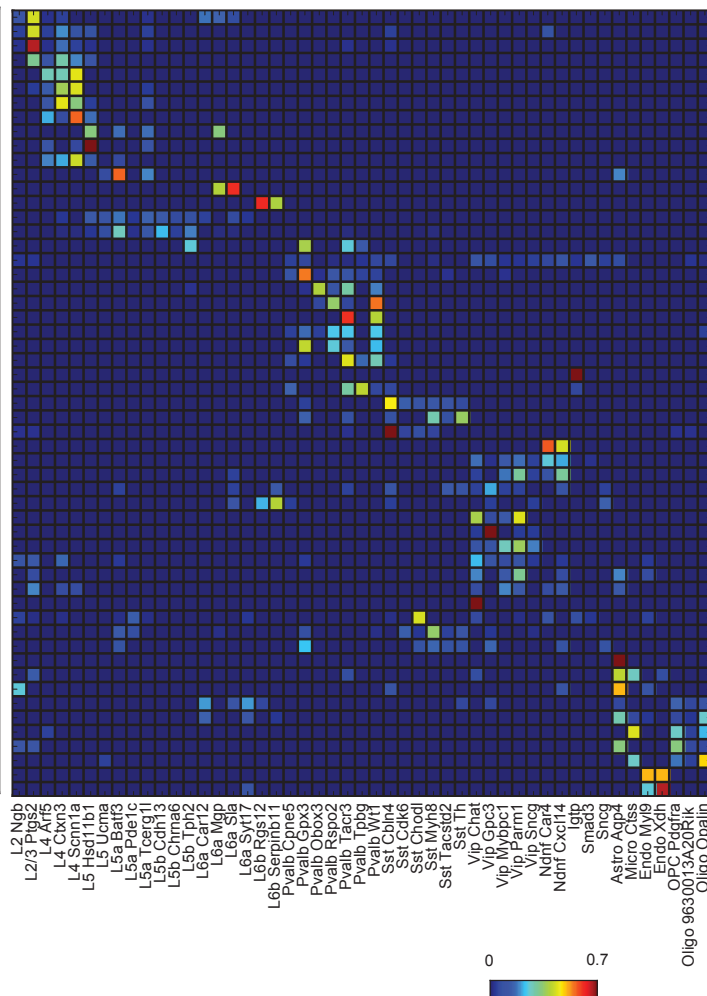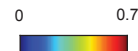

Supplement: supp [file elife-38619-supp-v1.zip]
