# Supplementary material for: Mapping the transcriptional diversity of genetically and anatomically defined cell populations in the mouse brain
Source: eLife journal article supplement (doi:10.7554/elife.38619), 2019-04-12
Supplement: supp [file elife-38619-supp-v1.zip]

Archive with 23 entries (23 files):
- elife_poa_e38619_Figure_2_figure_supplement_7.pdf
- elife_poa_e38619_Figure_5_figure_supplement_3.pdf
- elife_poa_e38619_Figure_3_figure_supplement_1.pdf
- elife_poa_e38619_Figure_1_figure_supplement_1.pdf
- elife_poa_e38619_Figure_2_figure_supplement_2.pdf
- elife_poa_e38619_Figure_2_figure_supplement_4.pdf
- elife_poa_e38619_Supplementary_file_1.xlsx
- elife_poa_e38619_Transparent_Reporting_File.pdf
- elife_poa_e38619_Figure_4_figure_supplement_1.pdf
- elife_poa_e38619_Supplementary_file_2.xlsx
- elife_poa_e38619_Figure_2_figure_supplement_1.pdf
- elife_poa_e38619_Figure_7_figure_supplement_3.pdf
- elife_poa_e38619_Supplementary_file_3.xlsx
- elife_poa_e38619_Figure_5_figure_supplement_4.pdf
- elife_poa_e38619_Figure_2_figure_supplement_6.pdf
- elife_poa_e38619_Figure_5_figure_supplement_1.pdf
- elife_poa_e38619_Figure_2_figure_supplement_3.pdf
- elife_poa_e38619_Figure_2_figure_supplement_5.pdf
- elife_poa_e38619_Figure_1_figure_supplement_2.pdf
- elife_poa_e38619_Figure_7_figure_supplement_1.pdf
- elife_poa_e38619_Figure_5_figure_supplement_2.pdf
- elife_poa_e38619_Figure_7_figure_supplement_2.pdf
- elife_poa_e38619_Figure_1_figure_supplement_3.pdf
