# Supplementary material for: Mapping the transcriptional diversity of genetically and anatomically defined cell populations in the mouse brain
Source: eLife journal article supplement (doi:10.7554/elife.38619), 2019-04-12
Supplement: supp [file elife-38619-supp-v1.zip › elife_poa_e38619_Figure_5_figure_supplement_1.pdf]

## A Low OFF Noise Genes PANTHER enrichment

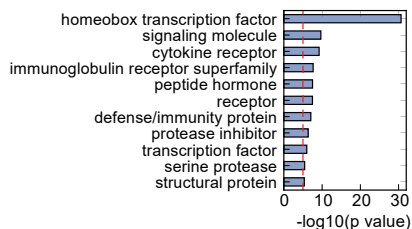

## B Low OFF Noise Genes GOM enrichment

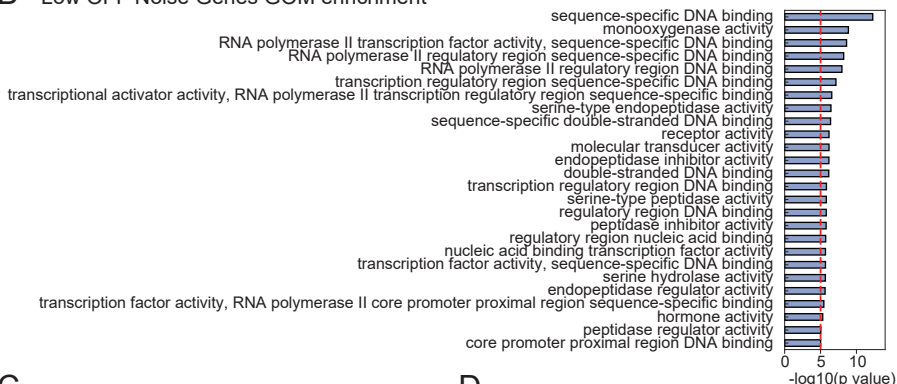

## C

### Max expression difference

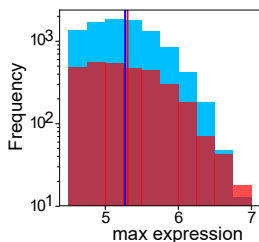

## D

### Gene length difference

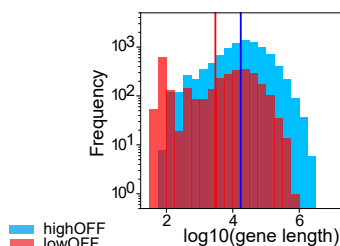

## E

### Orthogonality (PANTHER)

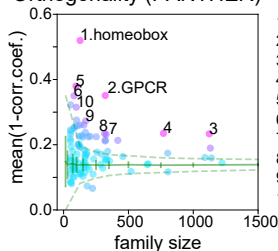

- 1:homeobox transcription factor( $z=17.4, n=127$ )
- 2:G-protein coupled receptor( $z=16.1, n=321$ )
- 3:receptor( $z=13.1, n=1124$ )
- 4:signaling molecule( $z=11.2, n=770$ )
- 5:serine protease inhibitor( $z=9.5, n=95$ )
- 6:cadherin( $z=7.4, n=80$ )
- 7:zinc finger transcription factor( $z=7.2, n=328$ )
- 8:extracellular matrix protein( $z=7.2, n=316$ )
- 9:protease inhibitor( $z=7.1, n=170$ )
- 10:peptide hormone( $z=7.1, n=98$ )
