# Supplementary material for: Mapping the transcriptional diversity of genetically and anatomically defined cell populations in the mouse brain
Source: eLife journal article supplement (doi:10.7554/elife.38619), 2019-04-12
Supplement: supp [file elife-38619-supp-v1.zip › elife_poa_e38619_Supplementary_file_1.xlsx]

## Sheet: Mouse Lines
line	regions	source	repository	repository url	janelia atlas	other atlas	ref	comment
56L	VISp,BAT	Brandeis			N		https://www.ncbi.nlm.nih.gov/pubmed/26999799	Sacha Nelson
AVP.QZ20	SCH,PVHp,SO,sup	GENSAT	MMRRC 034637-UCD	https://www.mmrrc.org/catalog/sds.php?mmrrc_id=34637	N	http://www.gensat.org/creGeneView.jsp?founder_id=88979&gene_id=1022&backcrossed=false
Adora2a.KG139	CP,OT	GENSAT	MMRRC 031168-UCD	https://www.mmrrc.org/catalog/sds.php?mmrrc_id=31168	Y	http://www.gensat.org/creGeneView.jsp?founder_id=64231&gene_id=93&backcrossed=false
Cdhr1.KG66	MOBgl	GENSAT	MMRRC 030952-UCD	https://www.mmrrc.org/catalog/sds.php?mmrrc_id=30952	Y	http://www.gensat.org/creGeneView.jsp?founder_id=64167&gene_id=1215&backcrossed=false
ChAT	VII,DMX,PBl	Jax	Jax 006410	http://jaxmice.jax.org/strain/006410.html	Y
Chrnb4.OL57	ACB	GENSAT	MMRRC 036203-UCD	https://www.mmrrc.org/catalog/sds.php?mmrrc_id=36203	Y	http://www.gensat.org/creGeneView.jsp?founder_id=84314&gene_id=400&backcrossed=false
Cnnm2.KD19	CA1,DG	Chip Gerfen			N		https://www.ncbi.nlm.nih.gov/pubmed/24360541
Crh.KN282	PVH,IO,CEAm	GENSAT	MMRRC 036507	https://www.mmrrc.org/catalog/sds.php?mmrrc_id=36507	N	http://www.gensat.org/creGeneView.jsp?founder_id=65463&gene_id=622&backcrossed=false
Cx3cr1-GFP	UVU,MOp5	Jax	Jax 005582	http://jaxmice.jax.org/strain/005582.html	Y
Drd3.KI198	MOBgr,isl,islm,chpl	GENSAT	MMRRC 031741-UCD	https://www.mmrrc.org/catalog/sds.php?mmrrc_id=31741	Y	http://www.gensat.org/creGeneView.jsp?founder_id=64984&gene_id=115&backcrossed=false
Fev	DR,RPA,CSm	Jax	Jax 012712	http://jaxmice.jax.org/strain/012712.html	Y
GIN	CA,Isocortex,AP,NTSge,Spinal Cord (L:Sp, dcs),CA3	Jax	Jax 003718	http://jaxmice.jax.org/strain/003718.html	N	in NIH Blueprint www.credrivermice.org
Gng7.KH67	IG,DG,SFO,RSPv,ACB,CP,chpl	GENSAT	MMRRC 031180-UCD	https://www.mmrrc.org/catalog/sds.php?mmrrc_id=31180	Y	http://www.gensat.org/creGeneView.jsp?founder_id=64327&gene_id=564&backcrossed=false
Gpr26.KO250	SSp,IO,AOB,MOBgl,CEAl,LGd,PVT	GENSAT	MMRRC 033032-UCD	https://www.mmrrc.org/catalog/sds.php?mmrrc_id=33032	Y	http://www.gensat.org/creGeneView.jsp?founder_id=65971&gene_id=1182&backcrossed=false
Grm2.MR90	DG,SFO,Spinal Cord (L:Sp)	GENSAT	MMRRC 034611-UCD	https://www.mmrrc.org/catalog/sds.php?mmrrc_id=34611	Y	http://www.gensat.org/creGeneView.jsp?founder_id=77696&gene_id=730&backcrossed=false
Grp.KH288	CA3,CA3,DMHp,AI,MO,CL,PCN,VPM,Spinal Cord (L:Sp)	GENSAT	MMRRC 031183-UCD	https://www.mmrrc.org/catalog/sds.php?mmrrc_id=31183	Y	http://www.gensat.org/creGeneView.jsp?founder_id=64359&gene_id=597&backcrossed=false
HSD2-Cre	CUL4, 5gr,MM,NTSm,PG				Y
Htr3a.NO152		GENSAT	MMRRC 036680-UCD	https://www.mmrrc.org/catalog/sds.php?mmrrc_id=36680	Y	http://www.gensat.org/creGeneView.jsp?founder_id=81215&gene_id=84&backcrossed=false
MCH-GFP	LHA,PVHd	Rockfeller			Y
Mpp3.KG118	PG	GENSAT	MMRRC 032809-UCD	https://www.mmrrc.org/catalog/sds.php?mmrrc_id=32809	N	http://www.gensat.org/creGeneView.jsp?founder_id=64205&gene_id=2341&backcrossed=false
NPY-hrGFP	ARH	Jax	Jax 006417	http://jaxmice.jax.org/strain/006417.html	N
Ntsr1.GN209	CUL4, 5pu,Isocortex,PIR,CP	GENSAT	MMRRC 030780-UCD	https://www.mmrrc.org/catalog/sds.php?mmrrc_id=30780	N	http://www.gensat.org/creGeneView.jsp?founder_id=44880&gene_id=511&backcrossed=false
Ntsr1.GN220	DG,VISp6a	GENSAT	MMRRC 017266-UCD	https://www.mmrrc.org/catalog/sds.php?mmrrc_id=17266	N	http://www.gensat.org/creGeneView.jsp?founder_id=44883&gene_id=511&backcrossed=false
Orexin-Cre	CEAm				N		https://www.ncbi.nlm.nih.gov/pubmed/19246384
Oxytocin-GFP	PVH		Jax 006043	http://jaxmice.jax.org/strain/006043.html	N
P038	ECT	Brandeis			Y		https://www.ncbi.nlm.nih.gov/pubmed/26999799	Sacha Nelson
P078	VISp	Brandeis			Y		https://www.ncbi.nlm.nih.gov/pubmed/26999799	Sacha Nelson
P084	CA1sp,SUBd-sp,SSp,AMd	Brandeis			Y		https://www.ncbi.nlm.nih.gov/pubmed/26999799	Sacha Nelson
P093	DCO,MV,PRP	Brandeis			Y		https://www.ncbi.nlm.nih.gov/pubmed/26999799	Sacha Nelson
P118	SCm,NTS	Brandeis			Y		https://www.ncbi.nlm.nih.gov/pubmed/26999799	Sacha Nelson
P157	IG,AI,ORBm	Brandeis			Y		https://www.ncbi.nlm.nih.gov/pubmed/26999799	Sacha Nelson
P159	CUL4, 5mo	Brandeis			Y		https://www.ncbi.nlm.nih.gov/pubmed/26999799	Sacha Nelson
P162	SUBd-sp,RSPv	Brandeis			N		https://www.ncbi.nlm.nih.gov/pubmed/26999799	Sacha Nelson
P170	Pancreas	Brandeis			N		https://www.ncbi.nlm.nih.gov/pubmed/26999799	Sacha Nelson
PBAP	CUL4, 5pu	Brandeis			N		https://www.ncbi.nlm.nih.gov/pubmed/26999799	Sacha Nelson
PBAU	COAp	Brandeis			N		https://www.ncbi.nlm.nih.gov/pubmed/26999799	Sacha Nelson
PBAV	MOBmi	Brandeis			Y		https://www.ncbi.nlm.nih.gov/pubmed/26999799	Sacha Nelson
PR26	Myofiber (EDL)	Jax	Jax 008069	http://jaxmice.jax.org/strain/008069.html	N	in NIH Blueprint www.credrivermice.org
Pcp2	CUL4, 5pu,PYRpu	Jax	Jax 010536	http://jaxmice.jax.org/strain/010536.html	N
PlxnD1.OG1	CUL4, 5pu,DG,CP	GENSAT	MMRRC 036631-UCD	https://www.mmrrc.org/catalog/sds.php?mmrrc_id=36631	Y	http://www.gensat.org/creGeneView.jsp?founder_id=83804&gene_id=1127&backcrossed=false
Pomc-GFP	DG, Pituitary,ARH	Jax	Jax 009593	http://jaxmice.jax.org/strain/009593.html	N
Pvalb-Cre	SSp,Ependyma,Myofiber,T1.DRG,CA1	Jax	Jax 010777	http://jaxmice.jax.org/strain/010777.html	N	in NIH Blueprint www.credrivermice.org
Rbp4.KL100	MOp5,AOB,AOBmi,Spinal Cord (L:Sp), MOE	GENSAT	MMRRC 031125-UCD	https://www.mmrrc.org/catalog/sds.php?mmrrc_id=31125	N	http://www.gensat.org/creGeneView.jsp?founder_id=65103&gene_id=657&backcrossed=false
SST23.2D2	CA1	Janelia			N			Adam Hantman
Sim1.KJ27	COAp	GENSAT	MMRRC 032080-UCD	https://www.mmrrc.org/catalog/sds.php?mmrrc_id=32080	N	http://www.gensat.org/creGeneView.jsp?founder_id=64600&gene_id=257&backcrossed=false
Sla.KJ303	COAp	GENSAT	MMRRC 034280-UCD	https://www.mmrrc.org/catalog/sds.php?mmrrc_id=34280	N	http://www.gensat.org/creGeneView.jsp?founder_id=64839&gene_id=732&backcrossed=false
Sla.KJ319	CUL4, 5mo	GENSAT	MMRRC 033066-UCD	https://www.mmrrc.org/catalog/sds.php?mmrrc_id=33066	N	http://www.gensat.org/creGeneView.jsp?founder_id=64843&gene_id=732&backcrossed=false
Slc17a6.OX23	MM,IC	GENSAT	MMRRC 036148-UCD	https://www.mmrrc.org/catalog/sds.php?mmrrc_id=36148	Y	http://www.gensat.org/creGeneView.jsp?founder_id=84916&gene_id=890&backcrossed=false
Slc17a7.2F8	PG,RT	Janelia			N			Adam Hantman
Slc6a5.KF109	CUL4, 5pu,PAG,DCO,AD,AV,LGd,PVT,VPM	GENSAT	MMRRC 030730-UCD	https://www.mmrrc.org/catalog/sds.php?mmrrc_id=30730	Y	http://www.gensat.org/creGeneView.jsp?founder_id=64042&gene_id=578&backcrossed=false
Sox1-GFP	Head, Tail	Austin Smith			N		http://www.ncbi.nlm.nih.gov/pubmed/12923295
Syt17.NO14	DG,VTA,AOBgr,PBl	GENSAT	MMRRC 034355-UCD	https://www.mmrrc.org/catalog/sds.php?mmrrc_id=34355	Y	http://www.gensat.org/creGeneView.jsp?founder_id=81072&gene_id=1708&backcrossed=false
TCGO	CUL4, 5gr	Brandeis			N		https://www.ncbi.nlm.nih.gov/pubmed/26999799	Sacha Nelson
TCLC	OE, MOE, VNO	Brandeis			Y		https://www.ncbi.nlm.nih.gov/pubmed/26999799	Sacha Nelson
TCLU	Epithelium, Ependyma	Brandeis			Y		https://www.ncbi.nlm.nih.gov/pubmed/26999799	Sacha Nelson
TH-Cre	SNc	Jax			N
TH-GFP	MV,LC	Jax			N	in NIH Blueprint www.credrivermice.org
Tmem90.TD24		GENSAT	MMRRC 036646-UCD	https://www.mmrrc.org/catalog/sds.php?mmrrc_id=36646	Y	http://www.gensat.org/creGeneView.jsp?founder_id=92334&gene_id=1673&backcrossed=false
Tph2.LO210-EGFP		GENSAT	MMRRC 032795-UCD	https://www.mmrrc.org/catalog/sds.php?mmrrc_id=32795	Y	http://www.gensat.org/ShowFounderLineImages.jsp?gensatFounderLine=LO210
TrpV1-Cre	T1.DRG, Jugular	Mark Hoon			N		http://www.ncbi.nlm.nih.gov/pubmed/21139565
TrpV1-GFP	Jugular	GENSAT	MMRRC 033029-UCD	https://www.mmrrc.org/catalog/sds.php?mmrrc_id=33029	N	http://www.gensat.org/imagenavigatorfileselection.jsp?bac.bac_experiment_name=BX2391
X98-GFP	Isocortex	Jax	Jax 006340	http://jaxmice.jax.org/strain/006340.html	N	in NIH Blueprint www.credrivermice.org
GFAP	Isocortex	Jax	Jax 003257	https://www.jax.org/strain/003257	N
