# Supplementary material for: Mapping the transcriptional diversity of genetically and anatomically defined cell populations in the mouse brain
Source: eLife journal article supplement (doi:10.7554/elife.38619), 2019-04-12
Supplement: supp [file elife-38619-supp-v1.zip › elife_poa_e38619_Supplementary_file_2.xlsx]

## Sheet: Sheet1
sample_id	sample_name	group	group_label	sample_label	seqlane	mouseline	sample_code	region	transmitter	allenregion	num_cells	age_(day)	sex	weight_(g)	ercc (10^-5 dilution ul)	ercc_mix	adaptor	total_reads	total_wo_ERCC	read_length	ercc%	ribosomal_etc%	unmapped_reads%	unique_reads%	nonunique_reads%	short_insert%	mapped_reads	comments
9	48L_PIR_m_9	48L_PIR	OLF.PIR_glu_48L	OLF.PIR_glu_48L_m57_9	120209-2	48L	cs.n	OLF	glu	PIR	40	57	M				solexa	8187285	8187285	96	0	0.259197	0.0806446	0.586538	0.02148	0.0521404	5309726
11	48L_PIR_m_11	48L_PIR	OLF.PIR_glu_48L	OLF.PIR_glu_48L_m58_11	120209-2	48L	cs.n	OLF	glu	PIR	40	58	M				solexa	10068140	10068140	96	0	0.321797	0.0609618	0.57556	0.022737	0.0189447	6441102
17	TCGO_CUL4..5gr_m122_17	TCGO_CUL4..5gr	CB.CUL4, 5gr_glu_TCGO	CB.CUL4, 5gr_glu_TCGO_m122_17	120530-2	TCGO	cs.n	CB	glu	CUL4..5gr	5000	122	M				solexa	16863940	16863940	96	0	0.101538	0.10153	0.773878	0.017582	0.00547191	13947847
18	TCGO_CUL4..5gr_m121_18	TCGO_CUL4..5gr	CB.CUL4, 5gr_glu_TCGO	CB.CUL4, 5gr_glu_TCGO_m121_18	120530-2	TCGO	cs.n	CB	glu	CUL4..5gr	5064	121	M				solexa	15627949	15627949	96	0	0.0867094	0.0903275	0.80374	0.0167279	0.00249547	13363555
24	Pcp2.Ai3_CUL4..5pu_m32_24	Pcp2.Ai_CUL4..5pu	CB.CUL4, 5pu_GABA_Pcp2	CB.CUL4, 5pu_GABA_Pcp2_m32_24	120530-3	Pcp2.Ai3	cs.n	CB	GABA	CUL4..5pu	242	32	M	18.4			solexa	17580736	17580736	96	0	0.263755	0.0608167	0.648297	0.0246596	0.00247106	12557473
25	Mpp3.KG118.Ai3_PG_m98_25	Mpp3.KG118.Ai_PG	P.PG_glu_Mpp3.KG118	P.PG_glu_Mpp3.KG118_m98_25	120530-4	Mpp3.KG118.Ai3	cs.n	P	glu	PG	128	98	M	24.1			solexa	18183884	18183884	96	0	0.210529	0.0550038	0.689259	0.0292445	0.0159633	14036899
26	Mpp3.KG118.Ai3_PG_m72_26	Mpp3.KG118.Ai_PG	P.PG_glu_Mpp3.KG118	P.PG_glu_Mpp3.KG118_m72_26	120530-4	Mpp3.KG118.Ai3	cs.n	P	glu	PG	106	72	M	23.2			solexa	15669105	15669105	96	0	0.253988	0.053695	0.66065	0.026437	0.00522985	11540604
27	Ntsr1.GN220.Ai3_VISp6a_f43_27	Ntsr1.GN220.Ai_VISp6a	Isocortex.VISp6a_glu_Ntsr1.GN220	Isocortex.VISp6a_glu_Ntsr1.GN220_f43_27	120530-4	Ntsr1.GN220.Ai3	cs.n	Isocortex	glu	VISp6a	101	43	F	17.2			solexa	15826375	15826375	96	0	0.139492	0.0660114	0.767812	0.0255087	0.00117551	13281997
28	Ntsr1.GN220.Ai3_VISp6a_f44_28	Ntsr1.GN220.Ai_VISp6a	Isocortex.VISp6a_glu_Ntsr1.GN220	Isocortex.VISp6a_glu_Ntsr1.GN220_f44_28	120530-4	Ntsr1.GN220.Ai3	cs.n	Isocortex	glu	VISp6a	86	44	F	18.1			solexa	16120463	16120463	96	0	0.266588	0.0764455	0.633795	0.0226871	0.000483547	11249956
65	Ntsr1.GN209.Ai3_CUL4..5pu_m216_65	Ntsr1.GN209.Ai_CUL4..5pu	CB.CUL4, 5pu_GABA_Ntsr1.GN209	CB.CUL4, 5pu_GABA_Ntsr1.GN209_m216_65	121220-1	Ntsr1.GN209.Ai3	cs.n	CB	GABA	CUL4..5pu	99	216	M	36.7	1.98	1	truseq	42419815	42384679	95	0.000828292	0.337529	0.0432429	0.589399	0.0297526	7.7009e-05	28364867
66	Ntsr1.GN209.Ai3_CUL4..5pu_m219_66	Ntsr1.GN209.Ai_CUL4..5pu	CB.CUL4, 5pu_GABA_Ntsr1.GN209	CB.CUL4, 5pu_GABA_Ntsr1.GN209_m219_66	121220-1	Ntsr1.GN209.Ai3	cs.n	CB	GABA	CUL4..5pu	64	219	M	39.9	1.28	1	truseq	27719665	27693775	95	0.000933994	0.367279	0.0454131	0.558641	0.0284877	0.000179102	17572681
67	Ntsr1.GN209.Ai3_CUL4..5pu_m219_67	Ntsr1.GN209.Ai_CUL4..5pu	CB.CUL4, 5pu_GABA_Ntsr1.GN209	CB.CUL4, 5pu_GABA_Ntsr1.GN209_m219_67	121220-1	Ntsr1.GN209.Ai3	cs.n	CB	GABA	CUL4..5pu	64	219	M	31.7	1.28	1	truseq	26991155	26963932	95	0.00100859	0.337246	0.044952	0.589011	0.0287	9.05654e-05	17967493
69	Sim1.KJ27.Ai9_COAp_m28_69	Sim1.KJ27.Ai_COAp	OLF.COAp_glu_Sim1.KJ27	OLF.COAp_glu_Sim1.KJ27_m28_69	121220-2	Sim1.KJ27.Ai9	cs.n	OLF	glu	COAp	46	28	M	18.7	0.92	1	truseq	24752930	24699043	95	0.002177	0.347434	0.0671109	0.560819	0.0242358	0.000399935	15601061
73	Cnnm2.KD19.Ai9_CA1_m23_73	Cnnm2.KD19.Ai_CA1	HPF.CA1_glu_Cnnm2.KD19	HPF.CA1_glu_Cnnm2.KD19_m23_73	121220-3	Cnnm2.KD19.Ai9	cs.n	HPF	glu	CA1	238	23	M	12.6	4.76	1	truseq	36322116	36052556	95	0.00742137	0.302879	0.0452653	0.623447	0.0283264	8.24075e-05	25542103
74	Ntsr1.GN220.Ai3_DG_m111_74	Ntsr1.GN220.Ai_DG	HPF.DG_glu_Ntsr1.GN220	HPF.DG_glu_Ntsr1.GN220_m111_74	121220-3	Ntsr1.GN220.Ai3	cs.n	HPF	glu	DG	152	111	M	27.7	3.04	1	truseq	26231702	25892501	95	0.012931	0.361047	0.0572898	0.556986	0.024451	0.000226475	16494216
75	Cnnm2.KD19.Ai9_CA1_m29_75	Cnnm2.KD19.Ai_CA1	HPF.CA1_glu_Cnnm2.KD19	HPF.CA1_glu_Cnnm2.KD19_m29_75	121220-4	Cnnm2.KD19.Ai9	cs.n	HPF	glu	CA1	235	29	M	17.9	4.7	1	truseq	29076110	28842385	95	0.00803839	0.293344	0.044918	0.63095	0.0307048	8.26561e-05	20856797
78	Cnnm2.KD19.Ai9_DG_m29_78	Cnnm2.KD19.Ai_DG	HPF.DG_glu_Cnnm2.KD19	HPF.DG_glu_Cnnm2.KD19_m29_78	121220-3	Cnnm2.KD19.Ai9	cs.n	HPF	glu	DG	237	29	M	17.9	4.74	1	truseq	29893325	29372427	95	0.0174252	0.290021	0.0478126	0.632866	0.0292166	8.31052e-05	21518144
79	X98-GFP_Isocortex@L5..6_m_79	X98-GFP_Isocortex@L5..6	Isocortex_GABA_X98-GFP	Isocortex_GABA_X98-GFP_m_79	121220-4	X98-GFP	cs.n	Isocortex	GABA	Isocortex@L5..6	60		M		1.2	1	truseq	36809781	36744540	95	0.00177238	0.226985	0.0512168	0.693126	0.028437	0.000235164	28522750
80	X98-GFP_Isocortex@L5..6_m_80	X98-GFP_Isocortex@L5..6	Isocortex_GABA_X98-GFP	Isocortex_GABA_X98-GFP_m_80	121220-4	X98-GFP	cs.n	Isocortex	GABA	Isocortex@L5..6	45		M		0.9	1	truseq	35762603	35675422	95	0.00243777	0.193707	0.0653099	0.714329	0.0264668	0.000187748	28276297
81	Gad2.33.7_@Re.RGC_m41_81	Gad2.33.7_@Re.RGC	@Re.RGC_glu_Gad2.33.7	@Re.RGC_glu_Gad2.33.7_m41_81	121220-5	Gad2.33.7	cs.n	others	glu	@Re.RGC	90	41	M		1.8	1	truseq	34508612	34368584	95	0.00405777	0.264477	0.0489153	0.651437	0.0350894	8.17898e-05	25898290	MTN projecting
83	Gad2.33.7_@Re.RGC__83	Gad2.33.7_@Re.RGC	@Re.RGC_glu_Gad2.33.7	@Re.RGC_glu_Gad2.33.7_m41_83	121220-5	Gad2.33.7	cs.n	others	glu	@Re.RGC	79	41	M		1.58	1	truseq	32207433	32084507	95	0.0038167	0.288726	0.0518191	0.625893	0.0334782	8.44333e-05	23197799	MTN projecting
84	Gad2.33.7_@Re.RGC__84	Gad2.33.7_@Re.RGC	@Re.RGC_glu_Gad2.33.7	@Re.RGC_glu_Gad2.33.7_m41_84	121220-5	Gad2.33.7	cs.n	others	glu	@Re.RGC	84	41	M		1.68	1	truseq	27172341	27015449	95	0.00577396	0.242711	0.0573007	0.66477	0.0351319	8.66171e-05	20795650	MTN projecting
86	SST23.2D2.virus_CA1_m94_86	SST23.2D2.virus_CA1	HPF.CA1_GABA_SST23.2D2.virus	HPF.CA1_GABA_SST23.2D2.virus_m94_86	121220-6	SST23.2D2.virus	cs.n	HPF	GABA	CA1	160	94	M	26.8	3.2	1	truseq	33377990	33286324	95	0.0027463	0.340131	0.0737325	0.555842	0.0302089	8.53504e-05	21395710
87	SST23.2D2.virus_CA1_m94_87	SST23.2D2.virus_CA1	HPF.CA1_GABA_SST23.2D2.virus	HPF.CA1_GABA_SST23.2D2.virus_m94_87	121220-6	SST23.2D2.virus	cs.n	HPF	GABA	CA1	148	94	M	28	2.96	1	truseq	38553784	38395989	95	0.00409285	0.32431	0.0713861	0.571734	0.0324702	9.90208e-05	25565606
90	TCGO_CUL4..5gr_m122_90	TCGO_CUL4..5gr	CB.CUL4, 5gr_glu_TCGO	CB.CUL4, 5gr_glu_TCGO_m122_90	130110-1	TCGO	cs.n	CB	glu	CUL4..5gr	5000	122	M		100	1	truseq	44042200	43918862	95	0.00280045	0.0780725	0.0488724	0.856813	0.0161376	0.000104465	39973249
91	Ntsr1.GN220.Ai3_VISp6a_m84_91	Ntsr1.GN220.Ai_VISp6a	Isocortex.VISp6a_glu_Ntsr1.GN220	Isocortex.VISp6a_glu_Ntsr1.GN220_m84_91	130110-1	Ntsr1.GN220.Ai3	cs.n	Isocortex	glu	VISp6a	51	84	M	27.5	1.02	1	truseq	51646606	51412354	95	0.00453567	0.175495	0.0398499	0.760879	0.0224843	0.00129235	42589206
92	Pcp2.Ai3_PYRpu_m25_92	Pcp2.Ai_PYRpu	CB.PYRpu_GABA_Pcp2	CB.PYRpu_GABA_Pcp2_m25_92	130110-1	Pcp2.Ai3	cs.n	CB	GABA	PYRpu	44	25	M	13.4	0.88	1	truseq	42602760	42577192	95	0.000600149	0.229978	0.037427	0.711186	0.0213506	5.77304e-05	32732713
93	Pcp2.Ai3_CUL4..5pu_m82_93	Pcp2.Ai_CUL4..5pu	CB.CUL4, 5pu_GABA_Pcp2	CB.CUL4, 5pu_GABA_Pcp2_m82_93	130110-2	Pcp2.Ai3	cs.n	CB	GABA	CUL4..5pu	100	82	M	26.1	2	1	truseq	48025427	47998455	95	0.000561619	0.199804	0.0370648	0.740049	0.0229781	0.000104045	38485151
94	TH-Cre.Ai9_SNc_m229_94	TH_SNc	MB.SNc_DA_TH-GFP	MB.SNc_DA_TH-Cre_m229_94	130110-2	TH-Cre.Ai9	cs.n	MB	DA	SNc	19	229	M		0.39	1	truseq	50629780	50590612	95	0.000773616	0.267904	0.0398022	0.666965	0.0252696	5.90228e-05	37326341
95	Pcp2.Ai3_CUL4..5pu_m38_95	Pcp2.Ai_CUL4..5pu	CB.CUL4, 5pu_GABA_Pcp2	CB.CUL4, 5pu_GABA_Pcp2_m38_95	130110-2	Pcp2.Ai3	cs.n	CB	GABA	CUL4..5pu	192	38	M	22.1	3.84	1	truseq	50069142	50048745	95	0.000407377	0.179601	0.0359139	0.760575	0.0237516	0.000158525	41216448
99	NPY-hrGFP.p55.fed_ARH_m46_99	NPY-hrGFP.p55.fed_ARH	HY.ARH_GABA_NPY-hrGFP	HY.ARH_GABA_NPY-hrGFP_m46_99	130110-4	NPY-hrGFP	cs.n	HY	GABA	ARH	112	46	M	25	2.24	1	truseq	50774328	50691626	95	0.00162882	0.238666	0.0446053	0.694871	0.0218261	3.15437e-05	38509735
100	NPY-hrGFP.p55.fed_ARH_m46_100	NPY-hrGFP.p55.fed_ARH	HY.ARH_GABA_NPY-hrGFP	HY.ARH_GABA_NPY-hrGFP_m46_100	130110-4	NPY-hrGFP	cs.n	HY	GABA	ARH	214	46	M	24	4.28	2	truseq	45533029	45480026	95	0.00116406	0.293047	0.0403777	0.644489	0.02205	3.61697e-05	32235295
105	TrpV1-Cre.Ai9_@Jugular_m68_105	TrpV1-Cre.Ai_@Jugular	@Jugular_glu_TrpV1-Cre	@Jugular_glu_TrpV1-Cre_m68_105	130110-5	TrpV1-Cre.Ai9	cs.n	others	glu	@Jugular	170	68	M		3.4	1	truseq	67533254	67520023	95	0.000195918	0.264626	0.034915	0.674769	0.0256153	7.49852e-05	50419093
106	TrpV1-Cre.Ai9_@Jugular_m29_106	TrpV1-Cre.Ai_@Jugular	@Jugular_glu_TrpV1-Cre	@Jugular_glu_TrpV1-Cre_m29_106	130110-5	TrpV1-Cre.Ai9	cs.n	others	glu	@Jugular	226	29	M		4.52	1	truseq	42001768	41994346	95	0.000176707	0.299596	0.0338252	0.641712	0.0248095	5.80554e-05	29863519
107	TrpV1-Cre.Ai9_@T1.DRG_m74_107	TrpV1-Cre.Ai_@T1.DRG	@T1.DRG_glu_TrpV1-Cre	@T1.DRG_glu_TrpV1-Cre_m74_107	130110-5	TrpV1-Cre.Ai9	cs.n	others	glu	@T1.DRG	158	74	M		3.16	2	truseq	45038495	45034032	95	9.9093e-05	0.241172	0.0335505	0.69928	0.0258612	0.000137007	34725021
108	TrpV1-Cre.Ai9_@T1.DRG_m35_108	TrpV1-Cre.Ai_@T1.DRG	@T1.DRG_glu_TrpV1-Cre	@T1.DRG_glu_TrpV1-Cre_m35_108	130110-5	TrpV1-Cre.Ai9	cs.n	others	glu	@T1.DRG	133	35	M		2.66	2	truseq	40828146	40824872	95	8.01898e-05	0.273103	0.03368	0.668715	0.0244112	9.07535e-05	30081904
109	TrpV1-Cre.Ai9_@Jugular_m35_109	TrpV1-Cre.Ai_@Jugular	@Jugular_glu_TrpV1-Cre	@Jugular_glu_TrpV1-Cre_m35_109	130110-6	TrpV1-Cre.Ai9	cs.n	others	glu	@Jugular	147	35	M		2.94	1	truseq	43735333	43727713	95	0.00017423	0.290852	0.032979	0.652906	0.0232329	2.93864e-05	31395530
112	PBAP_CUL4..5pu_m66_112	PBAP_CUL4..5pu	CB.CUL4, 5pu_GABA_PBAP	CB.CUL4, 5pu_GABA_PBAP_m66_112	130110-6	PBAP	cs.n	CB	GABA	CUL4..5pu	64	66	M	21	1.28	1	truseq	53561579	53537341	95	0.000452526	0.165514	0.043945	0.767371	0.0231395	2.97923e-05	44383888
113	TrpV1-Cre.Ai9_@Jugular__113	TrpV1-Cre.Ai_@Jugular	@Jugular_glu_TrpV1-Cre	@Jugular_glu_TrpV1-Cre_m_113	130110-7	TrpV1-Cre.Ai9	cs.n	others	glu	@Jugular	129		M		2.58	1	truseq	48772149	48758000	95	0.000290104	0.294729	0.0326836	0.647079	0.0254162	9.26617e-05	35013948
117	Oxytocin-GFP_PVH_m58_117	Oxytocin-GFP_PVH	HY.PVH_glu_Oxytocin-GFP	HY.PVH_glu_Oxytocin-GFP_m58_117	130403-1	Oxytocin-GFP	cs.n	HY	glu	PVH	108	58	M	22.8	2.16	1	truseq	31628387	31571667	100	0.00179333	0.242596	0.0502653	0.67083	0.0359599	0.000348604	24427743
118	Oxytocin-GFP_PVH_m59_118	Oxytocin-GFP_PVH	HY.PVH_glu_Oxytocin-GFP	HY.PVH_glu_Oxytocin-GFP_m59_118	130403-1	Oxytocin-GFP	cs.n	HY	glu	PVH	158	59	M	24	3.16	1	truseq	24338279	24285313	100	0.00217624	0.352488	0.0784699	0.536361	0.0325614	0.000119908	15267462
119	Oxytocin-GFP_PVH_f59_119	Oxytocin-GFP_PVH	HY.PVH_glu_Oxytocin-GFP	HY.PVH_glu_Oxytocin-GFP_f59_119	130403-1	Oxytocin-GFP	cs.n	HY	glu	PVH	116	59	F	20.4	2.32	1	truseq	28948085	28828317	100	0.00413734	0.292105	0.0502695	0.619389	0.038159	7.70423e-05	21023038
120	Oxytocin-GFP_PVH_f63_120	Oxytocin-GFP_PVH	HY.PVH_glu_Oxytocin-GFP	HY.PVH_glu_Oxytocin-GFP_f63_120	130403-1	Oxytocin-GFP	cs.n	HY	glu	PVH	116	63	F	18.8	2.32	1	truseq	29248912	29163768	100	0.00291101	0.277878	0.0466505	0.634864	0.0405249	8.24996e-05	21852800
121	Pomc-GFP_@Pituitary_m71_121	Pomc-GFP_@Pituitary	@Pituitary__Pomc-GFP	@Pituitary__Pomc-GFP_m71_121	130403-1	Pomc-GFP	cs.o	others		@Pituitary	86	71	M	23.9	1.72	1	truseq	27234361	27058139	100	0.00647058	0.275635	0.0452221	0.650109	0.0288786	0.000155037	20036861
122	Pomc-GFP_@Pituitary_m41_122	Pomc-GFP_@Pituitary	@Pituitary__Pomc-GFP	@Pituitary__Pomc-GFP_m41_122	130403-1	Pomc-GFP	cs.o	others		@Pituitary	106	41	M	16.2	2.12	1	truseq	30656832	30635032	100	0.000711098	0.272783	0.0444188	0.652861	0.0282148	0.00172309	22495706
123	Pomc-GFP_@Pituitary_m44_123	Pomc-GFP_@Pituitary	@Pituitary__Pomc-GFP	@Pituitary__Pomc-GFP_m44_123	130403-1	Pomc-GFP	cs.o	others		@Pituitary	112	44	M	19.4	2.24	1	truseq	30912384	30693532	100	0.00707975	0.24232	0.043915	0.681613	0.0320579	9.42544e-05	24002389
124	Oxytocin-GFP_PVH_m34_124	Oxytocin-GFP_PVH	HY.PVH_glu_Oxytocin-GFP	HY.PVH_glu_Oxytocin-GFP_m34_124	130403-1	Oxytocin-GFP	cs.n	HY	glu	PVH	94	34	M	18.3	1.88	1	truseq	33237556	33172301	100	0.00196329	0.246939	0.0494248	0.661133	0.0421401	0.000362953	25906614
125	PlxnD1.OG1.Ai3_CP_f48_125	PlxnD1.OG1.Ai_CP	STR.CP_GABA_PlxnD1.OG1	STR.CP_GABA_PlxnD1.OG1_f48_125	130403-2	PlxnD1.OG1.Ai3	cs.n	STR	GABA	CP	115	48	F	23.3	2.3	1	truseq	33101220	33020045	100	0.00245233	0.286627	0.0463598	0.639492	0.027407	0.0001149	23634497
126	PlxnD1.OG1.Ai3_CP_m55_126	PlxnD1.OG1.Ai_CP	STR.CP_GABA_PlxnD1.OG1	STR.CP_GABA_PlxnD1.OG1_m55_126	130403-2	PlxnD1.OG1.Ai3	cs.n	STR	GABA	CP	115	55	M	30.3	2.3	1	truseq	28755787	28523086	100	0.00809232	0.220251	0.0462812	0.703032	0.0301777	0.000258387	22609621
130	Pvalb-Cre.Ai9_@T1.DRG_m29_130	Pvalb-Cre.Ai_@T1.DRG	@T1.DRG_glu_Pvalb-Cre	@T1.DRG_glu_Pvalb-Cre_m29_130	130403-2	Pvalb-Cre.Ai9	cs.n	others	glu	@T1.DRG	163	29	M		3.26	1	truseq	26940587	26937760	100	0.000104935	0.321915	0.0390385	0.608393	0.0305708	8.27834e-05	18704827
131	Pvalb-Cre.Ai9_@T1.DRG_f37_131	Pvalb-Cre.Ai_@T1.DRG	@T1.DRG_glu_Pvalb-Cre	@T1.DRG_glu_Pvalb-Cre_f37_131	130403-2	Pvalb-Cre.Ai9	cs.n	others	glu	@T1.DRG	40	37	F		0.8	1	truseq	27840785	27837267	100	0.000126361	0.355785	0.0375889	0.574729	0.0318039	9.31844e-05	18469583
132	Pvalb-Cre.Ai9_@T1.DRG_f37_132	Pvalb-Cre.Ai_@T1.DRG	@T1.DRG_glu_Pvalb-Cre	@T1.DRG_glu_Pvalb-Cre_f37_132	130403-2	Pvalb-Cre.Ai9	cs.n	others	glu	@T1.DRG	97	37	F		1.94	1	truseq	28100692	28087787	100	0.000459241	0.414345	0.0445464	0.510439	0.0305488	0.000120373	16752082
133	Crh.ZJH.Ai3_IO_m37_133	Crh.ZJH.Ai_IO	MY.IO_glu_Crh.ZJH	MY.IO_glu_Crh.ZJH_m37_133	130411-1	Crh.ZJH.Ai3	cs.n	MY	glu	IO	33	37	M	20.3	0.66	1	truseq	32428006	32404051	95	0.000738713	0.289293	0.0603407	0.618557	0.031398	0.000410967	22927732
134	Crh.ZJH.Ai3_IO_m45_134	Crh.ZJH.Ai_IO	MY.IO_glu_Crh.ZJH	MY.IO_glu_Crh.ZJH_m45_134	130411-1	Crh.ZJH.Ai3	cs.n	MY	glu	IO	112	45	M	21.8	2.24	1	truseq	50087236	50011330	95	0.00151548	0.26761	0.0493524	0.650424	0.0324753	0.000137929	37145980
135	Crh.ZJH.Ai3_IO_m108_135	Crh.ZJH.Ai_IO	MY.IO_glu_Crh.ZJH	MY.IO_glu_Crh.ZJH_m108_135	130411-1	Crh.ZJH.Ai3	cs.n	MY	glu	IO	128	108	M	28.1	2.56	1	truseq	37670991	37617910	95	0.00140907	0.219986	0.234669	0.519179	0.0255126	0.000652827	22324982
141	Ntsr1.GN209.Ai3_CP_m105_141	Ntsr1.GN209.Ai_CP	STR.CP_GABA_Ntsr1.GN209	STR.CP_GABA_Ntsr1.GN209_m105_141	130411-2	Ntsr1.GN209.Ai3	cs.n	STR	GABA	CP	166	105	M	29.7	3.32	1	truseq	49325720	49097486	95	0.00462708	0.15758	0.0511798	0.756667	0.0343352	0.000238505	41986854
142	Ntsr1.GN209.Ai3_CP_m105_142	Ntsr1.GN209.Ai_CP	STR.CP_GABA_Ntsr1.GN209	STR.CP_GABA_Ntsr1.GN209_m105_142	130411-2	Ntsr1.GN209.Ai3	cs.n	STR	GABA	CP	176	105	M	28.4	3.52	1	truseq	38604422	38354177	95	0.00648229	0.151208	0.0533259	0.758071	0.0372467	0.000148146	33210254
143	Ntsr1.GN209.Ai3_CP_m60_143	Ntsr1.GN209.Ai_CP	STR.CP_GABA_Ntsr1.GN209	STR.CP_GABA_Ntsr1.GN209_m60_143	130411-2	Ntsr1.GN209.Ai3	cs.n	STR	GABA	CP	118	60	M	22.8	2.36	1	truseq	45278329	44964943	95	0.00692132	0.197732	0.0664129	0.697813	0.0373724	0.000670167	36353447
146	Ntsr1.GN209.Ai3_Isocortex_m57_146	Ntsr1.GN209.Ai_Isocortex	Isocortex_glu_Ntsr1.GN209	Isocortex_glu_Ntsr1.GN209_m57_146	130411-2	Ntsr1.GN209.Ai3	cs.n	Isocortex	glu	Isocortex	165	57	M	23	3.3	1	truseq	43163592	43029520	95	0.00310614	0.15424	0.0542957	0.750466	0.0408991	9.9606e-05	37187231
147	Ntsr1.GN209.Ai3_PIR_m61_147	Ntsr1.GN209.Ai_PIR	OLF.PIR_glu_Ntsr1.GN209	OLF.PIR_glu_Ntsr1.GN209_m61_147	130411-2	Ntsr1.GN209.Ai3	cs.n	OLF	glu	PIR	165	61	M	24.7	3.3	1	truseq	33561322	33477487	95	0.00249796	0.151027	0.0483165	0.761235	0.03934	8.20551e-05	29117528
148	Ntsr1.GN209.Ai3_PIR_m40_148	Ntsr1.GN209.Ai_PIR	OLF.PIR_glu_Ntsr1.GN209	OLF.PIR_glu_Ntsr1.GN209_m40_148	130411-2	Ntsr1.GN209.Ai3	cs.n	OLF	glu	PIR	136	40	M	20.6	2.72	1	truseq	34426678	34346877	95	0.002318	0.160302	0.0672274	0.735846	0.0365017	0.000122107	28790370
154	TCLC_@OE_f78_154	TCLC_@OE	@OE__TCLC	@OE__TCLC_f78_154	130411-3	TCLC	cs.o	others		@OE	92	78	F	21.2	1.84	1	truseq	51282073	51188654	95	0.00182167	0.273755	0.0370921	0.646629	0.0424768	4.73347e-05	39360267
155	TCLC_@OE_m78_155	TCLC_@OE	@OE__TCLC	@OE__TCLC_m78_155	130411-3	TCLC	cs.o	others		@OE	145	78	M	26.5	2.9	1	truseq	32207305	32087041	95	0.00373406	0.111174	0.71426	0.162626	0.0118809	5.92139e-05	6608566
168	PlxnD1.OG1.Ai3_CUL4..5pu_f51_168	PlxnD1.OG1.Ai_CUL4..5pu	CB.CUL4, 5pu_GABA_PlxnD1.OG1	CB.CUL4, 5pu_GABA_PlxnD1.OG1_f51_168	130418-2	PlxnD1.OG1.Ai3	cs.n	CB	GABA	CUL4..5pu	112	51	F	21.1	2.24	1	truseq	39672144	39642735	95	0.000741301	0.228879	0.0431548	0.694604	0.0332967	6.50056e-05	31078767
169	PlxnD1.OG1.Ai3_CUL4..5pu_f52_169	PlxnD1.OG1.Ai_CUL4..5pu	CB.CUL4, 5pu_GABA_PlxnD1.OG1	CB.CUL4, 5pu_GABA_PlxnD1.OG1_f52_169	130418-2	PlxnD1.OG1.Ai3	cs.n	CB	GABA	CUL4..5pu	157	52	F	20.7	3.14	1	truseq	44217689	44172747	95	0.00101638	0.242925	0.0419153	0.682956	0.032153	5.06421e-05	33984804
170	PlxnD1.OG1.Ai3_CUL4..5pu_f52_170	PlxnD1.OG1.Ai_CUL4..5pu	CB.CUL4, 5pu_GABA_PlxnD1.OG1	CB.CUL4, 5pu_GABA_PlxnD1.OG1_f52_170	130418-2	PlxnD1.OG1.Ai3	cs.n	CB	GABA	CUL4..5pu	49	52	F	24	0.98	1	truseq	42040406	42014780	95	0.000609556	0.282893	0.0425067	0.642761	0.031741	9.76561e-05	30554939
171	PlxnD1.OG1.Ai3_DG_f51_171	PlxnD1.OG1.Ai_DG	HPF.DG_glu_PlxnD1.OG1	HPF.DG_glu_PlxnD1.OG1_f51_171	130418-2	PlxnD1.OG1.Ai3	cs.n	HPF	glu	DG	120	51	F	21.1	2.4	1	truseq	45541293	45210904	95	0.00725471	0.1964	0.047999	0.726675	0.0288564	6.96735e-05	36888205
172	PlxnD1.OG1.Ai3_DG_f52_172	PlxnD1.OG1.Ai_DG	HPF.DG_glu_PlxnD1.OG1	HPF.DG_glu_PlxnD1.OG1_f52_172	130418-2	PlxnD1.OG1.Ai3	cs.n	HPF	glu	DG	114	52	F	20.7	2.28	1	truseq	48911404	48268469	95	0.0131449	0.204398	0.0571753	0.708128	0.0302398	5.94798e-05	38962988
181	HSD2-Cre.Ai3_NTSm_m76_181	HSD2-Cre.Ai_NTSm	MY.NTSm_glu_HSD2-Cre	MY.NTSm_glu_HSD2-Cre_m76_181	130418-3	HSD2-Cre.Ai3	cs.n	MY	glu	NTSm	125	76	M	28.5	2.5	1	truseq	50463154	50280220	95	0.0036251	0.284198	0.116211	0.56707	0.0324594	6.05208e-05	33243174
182	HSD2-Cre.Ai3_NTSm_m76_182	HSD2-Cre.Ai_NTSm	MY.NTSm_glu_HSD2-Cre	MY.NTSm_glu_HSD2-Cre_m76_182	130418-3	HSD2-Cre.Ai3	cs.n	MY	glu	NTSm	109	76	M	30.4	2.18	1	truseq	51598577	51261909	95	0.00652475	0.338785	0.0512086	0.575652	0.0342565	9.74018e-05	34733679
183	HSD2-Cre.Ai3_NTSm_m77_183	HSD2-Cre.Ai_NTSm	MY.NTSm_glu_HSD2-Cre	MY.NTSm_glu_HSD2-Cre_m77_183	130418-3	HSD2-Cre.Ai3	cs.n	MY	glu	NTSm	126	77	M	30.6	2.52	1	truseq	44140125	43968046	95	0.00389847	0.30873	0.0452394	0.611382	0.0345854	6.3114e-05	31229532
184	Sim1.KJ27.Ai9_COAp_m31_184	Sim1.KJ27.Ai_COAp	OLF.COAp_glu_Sim1.KJ27	OLF.COAp_glu_Sim1.KJ27_m31_184	130418-3	Sim1.KJ27.Ai9	cs.n	OLF	glu	COAp	128	31	M	20.3	2.56	1	truseq	44310675	44221462	95	0.00201335	0.241764	0.050171	0.676187	0.0317855	9.23081e-05	33894502
185	Sim1.KJ27.Ai9_COAp_m31_185	Sim1.KJ27.Ai_COAp	OLF.COAp_glu_Sim1.KJ27	OLF.COAp_glu_Sim1.KJ27_m31_185	130418-3	Sim1.KJ27.Ai9	cs.n	OLF	glu	COAp	130	31	M	20.9	2.6	1	truseq	44105964	44005728	95	0.00227262	0.217803	0.0484818	0.699984	0.033564	0.00016716	34951340
186	Sim1.KJ27.Ai9_COAp_m32_186	Sim1.KJ27.Ai_COAp	OLF.COAp_glu_Sim1.KJ27	OLF.COAp_glu_Sim1.KJ27_m32_186	130418-3	Sim1.KJ27.Ai9	cs.n	OLF	glu	COAp	122	32	M	22.4	2.44	1	truseq	44264450	44192444	95	0.00162672	0.230839	0.0489426	0.689869	0.0302702	7.94706e-05	34253674
189	Pvalb-Cre.virus_CA1_m100_189	Pvalb-Cre.virus_CA1	HPF.CA1_GABA_Pvalb-Cre.virus	HPF.CA1_GABA_Pvalb-Cre.virus_m100_189	130715-1	Pvalb-Cre.virus	cs.n	HPF	GABA	CA1	38	100	M	29	0.76	1	truseq	55420191	55352062	95	0.00122932	0.32427	0.0784347	0.571056	0.0261969	4.21845e-05	35725040
190	Pvalb-Cre.virus_CA1_m100_190	Pvalb-Cre.virus_CA1	HPF.CA1_GABA_Pvalb-Cre.virus	HPF.CA1_GABA_Pvalb-Cre.virus_m100_190	130715-1	Pvalb-Cre.virus	cs.n	HPF	GABA	CA1	63	100	M	26	1.26	1	truseq	52164304	52109763	95	0.00104556	0.249058	0.0708115	0.652101	0.0279405	8.89469e-05	38051178
191	Pvalb-Cre.virus_CA1_m100_191	Pvalb-Cre.virus_CA1	HPF.CA1_GABA_Pvalb-Cre.virus	HPF.CA1_GABA_Pvalb-Cre.virus_m100_191	130715-1	Pvalb-Cre.virus	cs.n	HPF	GABA	CA1	45	100	M	28	0.9	1	truseq	50963534	50916295	95	0.000926918	0.289102	0.0561774	0.628914	0.0257784	2.8812e-05	35680555
195	Slc17a7.2F8.Ai3_PG_m217_195	Slc17a7.2F8.Ai_PG	P.PG_glu_Slc17a7.2F8	P.PG_glu_Slc17a7.2F8_m217_195	130715-1	Slc17a7.2F8.Ai3	cs.n	P	glu	PG	48	217	M	32.4	0.96	1	truseq	43970672	43922035	95	0.00110612	0.382633	0.0579132	0.531705	0.0276945	5.487e-05	26822234
196	Slc17a7.2F8.Ai3_PG_m202_196	Slc17a7.2F8.Ai_PG	P.PG_glu_Slc17a7.2F8	P.PG_glu_Slc17a7.2F8_m202_196	130715-1	Slc17a7.2F8.Ai3	cs.n	P	glu	PG	55	202	M	37.1	1.1	1	truseq	49968564	49894704	95	0.00147813	0.409119	0.0592709	0.505743	0.0258145	5.2691e-05	28899408
198	SST23.2D2.virus_CA1_m103_198	SST23.2D2.virus_CA1	HPF.CA1_GABA_SST23.2D2.virus	HPF.CA1_GABA_SST23.2D2.virus_m103_198	130715-1	SST23.2D2.virus	cs.n	HPF	GABA	CA1	76	103	M	28.3	1.52	1	truseq	46620175	46553578	95	0.0014285	0.295115	0.0692569	0.608382	0.0271941	5.20261e-05	31942435
199	TCLC.allele42_NODgr_f53_199	TCLC.allele42_NODgr	CB.NODgr_glu_TCLC	CB.NODgr_glu_TCLC_f53_199	130715-1	TCLC	cs.n	CB	glu	NODgr	54	53	F	21.6	1.08	1	truseq	43851816	43654109	95	0.00450853	0.518518	0.0759815	0.389484	0.015951	6.56296e-05	19126109
200	TCLC.allele42_NODgr_f56_200	TCLC.allele42_NODgr	CB.NODgr_glu_TCLC	CB.NODgr_glu_TCLC_f56_200	130715-1	TCLC	cs.n	CB	glu	NODgr	64	56	F	20.8	1.28	1	truseq	37673708	37504479	95	0.00449197	0.421042	0.0606603	0.498846	0.0194063	4.53812e-05	20945755
202	Ntsr1.GN220.Ai3_DG_m32_202	Ntsr1.GN220.Ai_DG	HPF.DG_glu_Ntsr1.GN220	HPF.DG_glu_Ntsr1.GN220_m32_202	130715-1	Ntsr1.GN220.Ai3	cs.n	HPF	glu	DG	114	32	M	10.6	2.28	1	truseq	54356501	54171466	95	0.0034041	0.17725	0.0620906	0.736191	0.0244114	5.74288e-05	43811740
203	Grp.KH288.Ai14_MO_m55_203	Grp.KH288.Ai_MO	Isocortex.MO_glu_Grp.KH288	Isocortex.MO_glu_Grp.KH288_m55_203	130715-1	Grp.KH288.Ai14	cs.n	Isocortex	glu	MO	142	55	M	26	2.84	1	truseq	52960719	52894036	95	0.0012591	0.213141	0.0417724	0.716736	0.028317	3.37656e-05	42013767
204	Grp.KH288.Ai14_MO_m29_204	Grp.KH288.Ai_MO	Isocortex.MO_glu_Grp.KH288	Isocortex.MO_glu_Grp.KH288_m29_204	130715-1	Grp.KH288.Ai14	cs.n	Isocortex	glu	MO	150	29	M	24.2	3	1	truseq	44985426	44947777	95	0.000836915	0.247273	0.0421386	0.683566	0.0269816	4.06027e-05	34061075
205	GIN_Isocortex_m46_205	GIN_Isocortex	Isocortex_GABA_GIN	Isocortex_GABA_GIN_m46_205	130715-2	GIN	cs.n	Isocortex	GABA	Isocortex	146	46	M	25.4	2.92	1	truseq	50398333	50269926	95	0.00254784	0.199162	0.0847509	0.68511	0.0307889	0.000188522	38781482
206	GIN_Isocortex_m46_206	GIN_Isocortex	Isocortex_GABA_GIN	Isocortex_GABA_GIN_m46_206	130715-2	GIN	cs.n	Isocortex	GABA	Isocortex	164	46	M	26.9	3.28	1	truseq	44615097	44474917	95	0.00314199	0.256404	0.0977723	0.618024	0.027607	0.000193008	31030953
208	GIN_CA_m46_208	GIN_CA	HPF.CA_GABA_GIN	HPF.CA_GABA_GIN_m46_208	130715-2	GIN	cs.n	HPF	GABA	CA	102	46	M	25.4	2.04	1	truseq	37960097	37889481	95	0.00186027	0.208044	0.0939209	0.667419	0.0304089	0.000206574	28489833
209	GIN_CA_m46_209	GIN_CA	HPF.CA_GABA_GIN	HPF.CA_GABA_GIN_m46_209	130715-2	GIN	cs.n	HPF	GABA	CA	140	46	M	26.9	2.8	1	truseq	48321265	48249412	95	0.00148698	0.241019	0.0702265	0.660409	0.0281795	0.000166448	35589277
210	GIN_CA_m46_210	GIN_CA	HPF.CA_GABA_GIN	HPF.CA_GABA_GIN_m46_210	130715-2	GIN	cs.n	HPF	GABA	CA	121	46	M	27.5	2.42	1	truseq	49477512	49398953	95	0.00158777	0.288535	0.0870501	0.595822	0.0283684	0.000224742	33344359
211	Grp.KH288.Ai14_AI_m55_211	Grp.KH288.Ai_AI	Isocortex.AI_glu_Grp.KH288	Isocortex.AI_glu_Grp.KH288_m55_211	130715-2	Grp.KH288.Ai14	cs.n	Isocortex	glu	AI	168	55	M	26	3.36	1	truseq	43901358	43794049	95	0.00244432	0.150567	0.0876397	0.733242	0.0283307	0.000220555	35642019
212	Grp.KH288.Ai14_AI_m29_212	Grp.KH288.Ai_AI	Isocortex.AI_glu_Grp.KH288	Isocortex.AI_glu_Grp.KH288_m29_212	130715-2	Grp.KH288.Ai14	cs.n	Isocortex	glu	AI	104	29	M	24.2	2.08	1	truseq	45425056	45286419	95	0.00305199	0.178283	0.0926563	0.701143	0.0276656	0.000251819	35291222
221	HSD2-Cre.Ai3_PG_m53_221	HSD2-Cre.Ai_PG	P.PG_glu_HSD2-Cre	P.PG_glu_HSD2-Cre_m53_221	130715-3	HSD2-Cre.Ai3	cs.n	P	glu	PG	145	53	M	25.4	2.9	1	truseq	52503683	52388046	95	0.00220245	0.316012	0.0840467	0.570214	0.0295401	0.000187524	34272254
222	HSD2-Cre.Ai3_PG_m56_222	HSD2-Cre.Ai_PG	P.PG_glu_HSD2-Cre	P.PG_glu_HSD2-Cre_m56_222	130715-3	HSD2-Cre.Ai3	cs.n	P	glu	PG	158	56	M	23	3.16	1	truseq	49201761	49074213	95	0.00259235	0.233651	0.0788699	0.657877	0.0292882	0.000313423	36400621
223	HSD2-Cre.Ai3_PG_m56_223	HSD2-Cre.Ai_PG	P.PG_glu_HSD2-Cre	P.PG_glu_HSD2-Cre_m56_223	130715-3	HSD2-Cre.Ai3	cs.n	P	glu	PG	166	56	M	24.5	3.32	1	truseq	46363255	46278307	95	0.00183223	0.293162	0.074609	0.602485	0.0296054	0.000138531	31758954
229	Grp.KH288.Ai9_CA3_m22_229	Grp.KH288.Ai_CA3	HPF.CA3_glu_Grp.KH288	HPF.CA3_glu_Grp.KH288_m22_229	130715-3	Grp.KH288.Ai9	cs.n	HPF	glu	CA3	68	22	M	10.3	1.36	1	truseq	57345478	57342149	95	5.80517e-05	0.233027	0.049422	0.688371	0.029118	6.18916e-05	44046313
230	Grp.KH288.Ai9_CA3_m22_230	Grp.KH288.Ai_CA3	HPF.CA3_glu_Grp.KH288	HPF.CA3_glu_Grp.KH288_m22_230	130715-3	Grp.KH288.Ai9	cs.n	HPF	glu	CA3	125	22	M	11.1	2.5	1	truseq	41527969	41527397	95	1.37738e-05	0.346726	0.0398111	0.584016	0.0293999	4.67402e-05	27522277
231	Grp.KH288.Ai9_CA3_m22_231	Grp.KH288.Ai_CA3	HPF.CA3_glu_Grp.KH288	HPF.CA3_glu_Grp.KH288_m22_231	130715-3	Grp.KH288.Ai9	cs.n	HPF	glu	CA3	140	22	M	11.5	2.8	1	truseq	36750882	36750228	95	1.77955e-05	0.264213	0.0431861	0.661768	0.0307841	4.82446e-05	27376676
232	Grp.KH288.Ai9_VPM_m22_232	Grp.KH288.Ai_VPM	TH.VPM_glu_Grp.KH288	TH.VPM_glu_Grp.KH288_m22_232	130715-3	Grp.KH288.Ai9	cs.n	TH	glu	VPM	62	22	M	11.5	1.24	1	truseq	41294077	41293366	95	1.7218e-05	0.35236	0.0469419	0.575085	0.0246422	0.000970907	26559955
233	Grp.KH288.Ai9_VPM_m26_233	Grp.KH288.Ai_VPM	TH.VPM_glu_Grp.KH288	TH.VPM_glu_Grp.KH288_m26_233	130715-3	Grp.KH288.Ai9	cs.n	TH	glu	VPM	118	26	M	16.4	2.36	1	truseq	46319170	46318057	95	2.40289e-05	0.274736	0.042926	0.654263	0.0280118	6.28696e-05	33843404
234	Grp.KH288.Ai9_VPM_f26_234	Grp.KH288.Ai_VPM	TH.VPM_glu_Grp.KH288	TH.VPM_glu_Grp.KH288_f26_234	130715-3	Grp.KH288.Ai9	cs.n	TH	glu	VPM	78	26	F	13.7	1.56	1	truseq	49953440	49947981	95	0.000109282	0.269309	0.0468627	0.658886	0.0248822	5.95419e-05	36367029
235	Grp.KH288.Ai9_PCN_f27_235	Grp.KH288.Ai_PCN	TH.PCN_glu_Grp.KH288	TH.PCN_glu_Grp.KH288_f27_235	130715-3	Grp.KH288.Ai9	cs.n	TH	glu	PCN	150	27	F	12.7	3	1	truseq	48209047	48206460	95	5.36621e-05	0.251086	0.0474352	0.668919	0.0324991	6.07387e-05	36533290
236	Grp.KH288.Ai14_PCN_f77_236	Grp.KH288.Ai_PCN	TH.PCN_glu_Grp.KH288	TH.PCN_glu_Grp.KH288_f77_236	130715-3	Grp.KH288.Ai14	cs.n	TH	glu	PCN	132	77	F	21	2.64	1	truseq	45454121	45453151	95	2.13402e-05	0.260297	0.0441272	0.66336	0.0321648	5.06896e-05	34196882
237	Grp.KH288.Ai14_PCN_f77_237	Grp.KH288.Ai_PCN	TH.PCN_glu_Grp.KH288	TH.PCN_glu_Grp.KH288_f77_237	130715-4	Grp.KH288.Ai14	cs.n	TH	glu	PCN	145	77	F	22.6	2.9	1	truseq	58463354	58443786	95	0.000334705	0.23657	0.0445968	0.687419	0.0313691	4.51716e-05	45263416
238	Pomc-GFP_DG_f58_238	Pomc-GFP_DG	HPF.DG__Pomc-GFP	HPF.DG__Pomc-GFP_f58_238	130715-4	Pomc-GFP	cs.p	HPF		DG	90	58	F	17.3	1.8	1	truseq	51654721	51651315	95	6.59378e-05	0.154144	0.0606327	0.76096	0.0240781	0.000185978	42995820
239	Pomc-GFP_DG_f62_239	Pomc-GFP_DG	HPF.DG__Pomc-GFP	HPF.DG__Pomc-GFP_f62_239	130715-4	Pomc-GFP	cs.p	HPF		DG	134	62	F	20	2.68	1	truseq	50796402	50794210	95	4.31527e-05	0.125326	0.0570264	0.792045	0.025535	6.72518e-05	44140073
240	Pomc-GFP_DG_f62_240	Pomc-GFP_DG	HPF.DG__Pomc-GFP	HPF.DG__Pomc-GFP_f62_240	130715-4	Pomc-GFP	cs.p	HPF		DG	142	62	F	18.4	2.84	1	truseq	49994212	49991653	95	5.11859e-05	0.0827293	0.0664578	0.83145	0.0193039	5.88698e-05	44492842
244	Sla.KJ303.Ai3_COAp_f143_244	Sla.KJ303.Ai_COAp	OLF.COAp_glu_Sla.KJ303	OLF.COAp_glu_Sla.KJ303_f143_244	130715-4	Sla.KJ303.Ai3	cs.n	OLF	glu	COAp	150	143	F	24.4	3	1	truseq	50989107	50988509	95	1.1728e-05	0.249508	0.0429688	0.675224	0.0322525	4.62261e-05	38936431
250	Slc17a6.OX23.Ai3_IC_m145_250	Slc17a6.OX23.Ai_IC	MB.IC_glu_Slc17a6.OX23	MB.IC_glu_Slc17a6.OX23_m145_250	130715-4	Slc17a6.OX23.Ai3	cs.n	MB	glu	IC	152	145	M	28.9	3.04	1	truseq	55318611	55299297	95	0.000349141	0.170368	0.0520272	0.747064	0.0304487	9.21892e-05	46093448
251	Slc17a6.OX23.Ai3_IC_m148_251	Slc17a6.OX23.Ai_IC	MB.IC_glu_Slc17a6.OX23	MB.IC_glu_Slc17a6.OX23_m148_251	130715-4	Slc17a6.OX23.Ai3	cs.n	MB	glu	IC	138	148	M	30.5	2.76	1	truseq	42451333	42446098	95	0.000123318	0.227858	0.0545536	0.687245	0.0302746	6.96648e-05	32798719
252	Slc17a6.OX23.Ai3_IC_m126_252	Slc17a6.OX23.Ai_IC	MB.IC_glu_Slc17a6.OX23	MB.IC_glu_Slc17a6.OX23_m126_252	130715-4	Slc17a6.OX23.Ai3	cs.n	MB	glu	IC	142	126	M	29.2	2.84	1	truseq	45586625	45567989	95	0.000408804	0.203486	0.0535421	0.711863	0.0310339	7.47455e-05	36435812
376	HSD2-Cre.Ai3.ctrl_NTSm_m206_376	HSD2-Cre.Ai.ctrl_NTSm	MY.NTSm_glu_HSD2-Cre	MY.NTSm_glu_HSD2-Cre_m206_376	130815-1	HSD2-Cre.Ai3	cs.n	MY	glu	NTSm	76	206	M	32.9	1.52	1	truseq	36528513	36464240	100	0.00175953	0.27803	0.0445294	0.648947	0.0284242	6.96299e-05	26579308
377	HSD2-Cre.Ai3.ctrl_NTSm_m206_377	HSD2-Cre.Ai.ctrl_NTSm	MY.NTSm_glu_HSD2-Cre	MY.NTSm_glu_HSD2-Cre_m206_377	130815-1	HSD2-Cre.Ai3	cs.n	MY	glu	NTSm	64	206	M	34.2	1.28	1	truseq	31583410	31447061	100	0.00431711	0.373694	0.0667164	0.530701	0.0287453	0.000143225	19301338
378	HSD2-Cre.Ai3.ctrl_NTSm_f206_378	HSD2-Cre.Ai.ctrl_NTSm	MY.NTSm_glu_HSD2-Cre	MY.NTSm_glu_HSD2-Cre_f206_378	130815-1	HSD2-Cre.Ai3	cs.n	MY	glu	NTSm	128	206	F	24.8	2.56	1	truseq	68301278	68166948	100	0.00196673	0.283752	0.0414585	0.642227	0.0324343	0.000127643	49950948
380	Crh.ZJH.Ai14_PVH_m46_380	Crh.ZJH.Ai_PVH	HY.PVH_glu_Crh.ZJH	HY.PVH_glu_Crh.ZJH_m46_380	130815-1	Crh.ZJH.Ai14	cs.n	HY	glu	PVH	122	46	M	21.5	2.44	1	truseq	24144916	24030494	100	0.00473897	0.31346	0.0525906	0.605883	0.0279662	0.000100747	16565574
381	Pomc-GFP.p55.fed_ARH_m51_381	Pomc-GFP.p55.fed_ARH	HY.ARH_glu_Pomc-GFP	HY.ARH_glu_Pomc-GFP_m51_381	130815-2	Pomc-GFP	cs.n	HY	glu	ARH	108	51	M	21.3	2.16	1	truseq	44203695	44120053	100	0.00189219	0.31816	0.0487503	0.60308	0.0297681	0.000241568	30372301
382	Pomc-GFP.p55.fed_ARH_m51_382	Pomc-GFP.p55.fed_ARH	HY.ARH_glu_Pomc-GFP	HY.ARH_glu_Pomc-GFP_m51_382	130815-2	Pomc-GFP	cs.n	HY	glu	ARH	51	51	M	21.7	1.02	1	truseq	48110406	48059567	100	0.00105671	0.410296	0.0573772	0.50731	0.0248832	0.000133439	27787970
383	Pomc-GFP.p55.fed_ARH_m51_383	Pomc-GFP.p55.fed_ARH	HY.ARH_glu_Pomc-GFP	HY.ARH_glu_Pomc-GFP_m51_383	130815-2	Pomc-GFP	cs.n	HY	glu	ARH	102	51	M	19.1	2.04	1	truseq	64688943	64586308	100	0.00158659	0.273367	0.0458436	0.652363	0.0280473	0.000379059	47354359
389	Syt17.NO14.Ai3_VTA_f49_389	Syt17.NO14.Ai_VTA	MB.VTA_glu,DA_Syt17.NO14	MB.VTA_glu,DA_Syt17.NO14_f49_389	130820-1	Syt17.NO14.Ai3	cs.n	MB	glu,DA	VTA	121	49	F	18.9	2.42	1	truseq	52303904	52296482	95	0.000141901	0.304724	0.0431821	0.618026	0.0339814	8.57993e-05	37287365
390	Syt17.NO14.Ai3_VTA_f52_390	Syt17.NO14.Ai_VTA	MB.VTA_glu,DA_Syt17.NO14	MB.VTA_glu,DA_Syt17.NO14_f52_390	130820-1	Syt17.NO14.Ai3	cs.n	MB	glu,DA	VTA	127	52	F	19.1	2.54	1	truseq	50565052	50546518	95	0.000366538	0.321689	0.0399261	0.604677	0.0336548	5.27039e-05	35309575
391	Rbp4.KL100.Ai3_AOB_f87_391	Rbp4.KL100.Ai_AOB	OLF.AOB_glu_Rbp4.KL100	OLF.AOB_glu_Rbp4.KL100_f87_391	130820-1	Rbp4.KL100.Ai3	cs.n	OLF	glu	AOB	128	87	F	22.7	2.56	1	truseq	54899004	54830930	95	0.00123999	0.204385	0.0444734	0.719288	0.031812	4.14729e-05	44363038
392	Rbp4.KL100.Ai3_AOB_f88_392	Rbp4.KL100.Ai_AOB	OLF.AOB_glu_Rbp4.KL100	OLF.AOB_glu_Rbp4.KL100_f88_392	130820-1	Rbp4.KL100.Ai3	cs.n	OLF	glu	AOB	141	88	F	28.9	2.82	1	truseq	50677454	50646121	95	0.000618283	0.219861	0.0467491	0.701556	0.0317877	4.59463e-05	40034192
393	Rbp4.KL100.Ai3_AOB@EPlA_f88_393	Rbp4.KL100.Ai_AOB@EPlA	OLF.AOB@EPlA_glu_Rbp4.KL100	OLF.AOB@EPlA_glu_Rbp4.KL100_f88_393	130820-1	Rbp4.KL100.Ai3	cs.n	OLF	glu	AOB@EPlA	125	88	F	28.9	2.5	1	truseq	52581341	52528715	95	0.00100085	0.222418	0.0503344	0.696774	0.0304171	5.5779e-05	41129993
394	Rbp4.KL100.Ai3_AOB_f66_394	Rbp4.KL100.Ai_AOB	OLF.AOB_glu_Rbp4.KL100	OLF.AOB_glu_Rbp4.KL100_f66_394	130820-1	Rbp4.KL100.Ai3	cs.n	OLF	glu	AOB	130	66	F	17.7	2.6	1	truseq	55859506	55736454	95	0.00220288	0.221351	0.0422452	0.701942	0.0344171	4.53204e-05	44554704
395	Rbp4.KL100.Ai3_AOB@EPlA_f66_395	Rbp4.KL100.Ai_AOB@EPlA	OLF.AOB@EPlA_glu_Rbp4.KL100	OLF.AOB@EPlA_glu_Rbp4.KL100_f66_395	130820-1	Rbp4.KL100.Ai3	cs.n	OLF	glu	AOB@EPlA	125	66	F	17.7	2.5	1	truseq	51363765	51341312	95	0.000437137	0.198331	0.0431693	0.725313	0.03314	4.67265e-05	42003301
396	Rbp4.KL100.Ai3_AOB@EPlA_f44_396	Rbp4.KL100.Ai_AOB@EPlA	OLF.AOB@EPlA_glu_Rbp4.KL100	OLF.AOB@EPlA_glu_Rbp4.KL100_f44_396	130820-1	Rbp4.KL100.Ai3	cs.n	OLF	glu	AOB@EPlA	66	44	F	18.8	1.32	1	truseq	59128456	59105373	95	0.000390387	0.193276	0.0509196	0.722657	0.0330664	8.14308e-05	48155243
397	Gng7.KH67.Ai3_CP_m50_397	Gng7.KH67.Ai_CP	STR.CP_GABA_Gng7.KH67	STR.CP_GABA_Gng7.KH67_m50_397	130820-1	Gng7.KH67.Ai3	cs.n	STR	GABA	CP	158	50	M	26.4	3.16	1	truseq	58030474	57846379	95	0.00317238	0.189088	0.0509452	0.733815	0.0259579	0.000193564	46838570
398	Gng7.KH67.Ai3_CP_m50_398	Gng7.KH67.Ai_CP	STR.CP_GABA_Gng7.KH67	STR.CP_GABA_Gng7.KH67_m50_398	130820-1	Gng7.KH67.Ai3	cs.n	STR	GABA	CP	156	50	M	27.2	3.12	1	truseq	50017815	49878343	95	0.00278845	0.222142	0.0488632	0.700374	0.0285112	0.000109506	38984124
399	Gng7.KH67.Ai3_CP_m51_399	Gng7.KH67.Ai_CP	STR.CP_GABA_Gng7.KH67	STR.CP_GABA_Gng7.KH67_m51_399	130820-1	Gng7.KH67.Ai3	cs.n	STR	GABA	CP	157	51	M	27	3.14	1	truseq	40813278	40720392	95	0.00227588	0.187407	0.0415386	0.742012	0.0289735	6.90563e-05	33529185
400	Gng7.KH67.Ai3_DG_m51_400	Gng7.KH67.Ai_DG	HPF.DG_glu_Gng7.KH67	HPF.DG_glu_Gng7.KH67_m51_400	130820-1	Gng7.KH67.Ai3	cs.n	HPF	glu	DG	152	51	M	27	3.04	1	truseq	45145858	44915200	95	0.00510917	0.16497	0.0490882	0.757542	0.0282998	9.9788e-05	37910377
404	Gng7.KH67.Ai3_DG_m55_404	Gng7.KH67.Ai_DG	HPF.DG_glu_Gng7.KH67	HPF.DG_glu_Gng7.KH67_m55_404	130820-1	Gng7.KH67.Ai3	cs.n	HPF	glu	DG	152	55	M	29.1	3.04	1	truseq	49969742	49773010	95	0.00393702	0.190339	0.0522354	0.729821	0.0275356	6.89129e-05	40412438
405	Gng7.KH67.Ai3_DG_f102_405	Gng7.KH67.Ai_DG	HPF.DG_glu_Gng7.KH67	HPF.DG_glu_Gng7.KH67_f102_405	130820-2	Gng7.KH67.Ai3	cs.n	HPF	glu	DG	176	102	F	25	3.52	1	truseq	51767424	51649350	95	0.00228086	0.197285	0.0506009	0.725806	0.0262491	5.8568e-05	41484690
409	Gng7.KH67.Ai3_SFO_f110_409	Gng7.KH67.Ai_SFO	HY.SFO_glu,GABA_Gng7.KH67	HY.SFO_glu,GABA_Gng7.KH67_f110_409	130820-2	Gng7.KH67.Ai3	cs.n	HY	glu,GABA	SFO	68	110	F	21.8	1.36	1	truseq	39017674	38852205	95	0.00424087	0.23537	0.0537155	0.682199	0.0286252	9.02394e-05	29880460
410	Gng7.KH67.Ai3_SFO_f110_410	Gng7.KH67.Ai_SFO	HY.SFO_glu,GABA_Gng7.KH67	HY.SFO_glu,GABA_Gng7.KH67_f110_410	130820-2	Gng7.KH67.Ai3	cs.n	HY	glu,GABA	SFO	87	110	F	22.4	1.74	1	truseq	44582561	44225412	95	0.00801096	0.299429	0.0559906	0.611781	0.0327166	8.24639e-05	31507768
414	Slc17a6.OX23.Ai3_MM_f182_414	Slc17a6.OX23.Ai_MM	HY.MM_glu_Slc17a6.OX23	HY.MM_glu_Slc17a6.OX23_f182_414	130820-2	Slc17a6.OX23.Ai3	cs.n	HY	glu	MM	117	182	F	25.8	2.34	1	truseq	46935646	46849957	95	0.00182567	0.251855	0.0450543	0.67266	0.0303941	3.72039e-05	35588227
415	Slc17a6.OX23.Ai3_MM_f182_415	Slc17a6.OX23.Ai_MM	HY.MM_glu_Slc17a6.OX23	HY.MM_glu_Slc17a6.OX23_f182_415	130820-2	Slc17a6.OX23.Ai3	cs.n	HY	glu	MM	121	182	F	29.6	2.42	1	truseq	40966598	40856893	95	0.00267791	0.205397	0.0414539	0.725627	0.0274773	4.45213e-05	32937082
416	Slc17a6.OX23.Ai3_MM_m183_416	Slc17a6.OX23.Ai_MM	HY.MM_glu_Slc17a6.OX23	HY.MM_glu_Slc17a6.OX23_m183_416	130820-2	Slc17a6.OX23.Ai3	cs.n	HY	glu	MM	126	183	M	35.1	2.52	1	truseq	47443405	47352317	95	0.00191993	0.25479	0.0431291	0.670082	0.0319434	5.54355e-05	36011473
417	Gpr26.KO250.Ai3_CEAl_m77_417	Gpr26.KO250.Ai_CEAl	STR.CEAl_GABA_Gpr26.KO250	STR.CEAl_GABA_Gpr26.KO250_m77_417	130820-2	Gpr26.KO250.Ai3	cs.n	STR	GABA	CEAl	96	77	M	32	1.92	1	truseq	50009812	49930743	95	0.00158107	0.19458	0.0446793	0.734297	0.0263736	6.99168e-05	40453884
418	Gpr26.KO250.Ai3_CEAl_m77_418	Gpr26.KO250.Ai_CEAl	STR.CEAl_GABA_Gpr26.KO250	STR.CEAl_GABA_Gpr26.KO250_m77_418	130820-2	Gpr26.KO250.Ai3	cs.n	STR	GABA	CEAl	100	77	M	34.7	2	1	truseq	54523054	54431690	95	0.0016757	0.24123	0.0499461	0.677315	0.0314262	8.23969e-05	41718652
419	Gpr26.KO250.Ai3_CEAl_m78_419	Gpr26.KO250.Ai_CEAl	STR.CEAl_GABA_Gpr26.KO250	STR.CEAl_GABA_Gpr26.KO250_m78_419	130820-2	Gpr26.KO250.Ai3	cs.n	STR	GABA	CEAl	50	78	M	32.9	1	1	truseq	47903746	47840907	95	0.00131178	0.203252	0.0796684	0.69014	0.0268383	0.000101273	36727531
420	TrpV1-GFP_@Jugular_f298_420	TrpV1-GFP_@Jugular	@Jugular_glu_TrpV1-GFP	@Jugular_glu_TrpV1-GFP_f298_420	130820-2	TrpV1-GFP	cs.n	others	glu	@Jugular	93	298	F		1.86	1	truseq	49662878	49640264	95	0.00045535	0.308585	0.0384481	0.6153	0.0376231	4.40167e-05	35850701
421	TrpV1-GFP_@Jugular_m298_421	TrpV1-GFP_@Jugular	@Jugular_glu_TrpV1-GFP	@Jugular_glu_TrpV1-GFP_m298_421	130919-1	TrpV1-GFP	cs.n	others	glu	@Jugular	81	298	M		1.62	1	truseq	48957468	48948076	95	0.00019184	0.248759	0.0363486	0.675481	0.0393497	6.24131e-05	38477112
422	TrpV1-GFP_@Jugular_f298_422	TrpV1-GFP_@Jugular	@Jugular_glu_TrpV1-GFP	@Jugular_glu_TrpV1-GFP_f298_422	130919-1	TrpV1-GFP	cs.n	others	glu	@Jugular	83	298	F		1.66	1	truseq	47549927	47531773	95	0.000381788	0.314015	0.0385215	0.610469	0.0369391	5.46582e-05	33989560
423	Gpr26.KO250.Ai3_MOBgl_m106_423	Gpr26.KO250.Ai_MOBgl	OLF.MOBgl_glu_Gpr26.KO250	OLF.MOBgl_glu_Gpr26.KO250_m106_423	130919-1	Gpr26.KO250.Ai3	cs.n	OLF	glu	MOBgl	74	106	M	29.9	1.48	1	truseq	46596915	46533255	95	0.00136619	0.349796	0.0606471	0.566182	0.0232287	0.000145788	29540585
424	Gpr26.KO250.Ai3_AOB_m106_424	Gpr26.KO250.Ai_AOB	OLF.AOB_glu_Gpr26.KO250	OLF.AOB_glu_Gpr26.KO250_m106_424	130919-1	Gpr26.KO250.Ai3	cs.n	OLF	glu	AOB	51	106	M	29.9	1.02	1	truseq	49535111	49479470	95	0.00112326	0.219827	0.051456	0.695784	0.0328271	0.000106307	39012732
425	Gpr26.KO250.Ai3_MOBgl_m107_425	Gpr26.KO250.Ai_MOBgl	OLF.MOBgl_glu_Gpr26.KO250	OLF.MOBgl_glu_Gpr26.KO250_m107_425	130919-1	Gpr26.KO250.Ai3	cs.n	OLF	glu	MOBgl	110	107	M	30.3	2.2	1	truseq	43585374	43480898	95	0.00239704	0.266922	0.0527717	0.655294	0.0248975	0.000114694	31760055
426	Gpr26.KO250.Ai3_AOB_m107_426	Gpr26.KO250.Ai_AOB	OLF.AOB_glu_Gpr26.KO250	OLF.AOB_glu_Gpr26.KO250_m107_426	130919-1	Gpr26.KO250.Ai3	cs.n	OLF	glu	AOB	84	107	M	30.3	1.68	1	truseq	52225541	52139546	95	0.00164661	0.188013	0.0478887	0.732209	0.0317827	0.000106579	42923742
428	Gpr26.KO250.Ai3_AOB_f132_428	Gpr26.KO250.Ai_AOB	OLF.AOB_glu_Gpr26.KO250	OLF.AOB_glu_Gpr26.KO250_f132_428	130919-1	Gpr26.KO250.Ai3	cs.n	OLF	glu	AOB	77	132	F	27.2	1.54	1	truseq	64455899	64356300	95	0.00154523	0.18124	0.0525606	0.738197	0.027885	0.000117331	52764732
429	GIN_@Sp.L.dcs_m116_429	GIN_@Sp.L.dcs	@Sp.L.dcs_GABA_GIN	@Sp.L.dcs_GABA_GIN_m116_429	130919-1	GIN	cs.n	others	GABA	@Sp.L.dcs	40	116	M	32	0.8	1	truseq	31692719	31574915	95	0.00371707	0.218156	0.0638742	0.692236	0.0254221	0.000311133	24346911
430	GIN_@Sp.L.Sp_m116_430	GIN_@Sp.L.Sp	@Sp.L.Sp_GABA_GIN	@Sp.L.Sp_GABA_GIN_m116_430	130919-1	GIN	cs.n	others	GABA	@Sp.L.Sp	73	116	M	32	1.46	1	truseq	31273596	31166245	95	0.00343264	0.182025	0.0527292	0.739387	0.0257103	0.000148077	25477018
431	GIN_@Sp.L.dcs_m120_431	GIN_@Sp.L.dcs	@Sp.L.dcs_GABA_GIN	@Sp.L.dcs_GABA_GIN_m120_431	130919-1	GIN	cs.n	others	GABA	@Sp.L.dcs	96	120	M	30.4	1.92	1	truseq	31138923	31018613	95	0.00386365	0.224411	0.0560974	0.694155	0.0247612	0.000575977	23905794
432	GIN_@Sp.L.Sp_m120_432	GIN_@Sp.L.Sp	@Sp.L.Sp_GABA_GIN	@Sp.L.Sp_GABA_GIN_m120_432	130919-1	GIN	cs.n	others	GABA	@Sp.L.Sp	54	120	M	30.4	1.08	1	truseq	31780199	31644577	95	0.0042675	0.167588	0.0538226	0.751487	0.0267397	0.000362558	26374842
433	GIN_@Sp.L.dcs_m78_433	GIN_@Sp.L.dcs	@Sp.L.dcs_GABA_GIN	@Sp.L.dcs_GABA_GIN_m78_433	130919-1	GIN	cs.n	others	GABA	@Sp.L.dcs	71	78	M	29.4	1.42	1	truseq	26846826	26747163	95	0.00371228	0.27915	0.0574181	0.637002	0.0262574	0.000173402	19205026
434	GIN_@Sp.L.Sp_m78_434	GIN_@Sp.L.Sp	@Sp.L.Sp_GABA_GIN	@Sp.L.Sp_GABA_GIN_m78_434	130919-1	GIN	cs.n	others	GABA	@Sp.L.Sp	132	78	M	29.4	2.64	1	truseq	31427224	31267029	95	0.00509733	0.216756	0.0543482	0.702125	0.0266367	0.000134071	24524896
435	Gpr26.KO250.Ai3_PVT_m47_435	Gpr26.KO250.Ai_PVT	TH.PVT_glu_Gpr26.KO250	TH.PVT_glu_Gpr26.KO250_m47_435	130919-1	Gpr26.KO250.Ai3	cs.n	TH	glu	PVT	130	47	M	30.8	2.6	1	truseq	30677383	30621368	95	0.00182594	0.226728	0.044216	0.695855	0.0331014	0.000100028	24227176
436	Gpr26.KO250.Ai3_LGd_m47_436	Gpr26.KO250.Ai_LGd	TH.LGd_glu_Gpr26.KO250	TH.LGd_glu_Gpr26.KO250_m47_436	130919-1	Gpr26.KO250.Ai3	cs.n	TH	glu	LGd	125	47	M	30.8	2.5	1	truseq	39344320	39289085	95	0.00140389	0.21177	0.138306	0.622279	0.0275379	0.000107638	27516551
444	Crh.ZJH.Ai14_CEAm_m46_444	Crh.ZJH.Ai_CEAm	STR.CEAm_GABA_Crh.ZJH	STR.CEAm_GABA_Crh.ZJH_m46_444	130919-2	Crh.ZJH.Ai14	cs.n	STR	GABA	CEAm	70	46	M	21.5	1.4	1	truseq	43996065	43813447	95	0.00415078	0.201799	0.0521119	0.719514	0.0264189	0.000156527	34914692
453	Gpr26.KO250.Ai3_PVT_f135_453	Gpr26.KO250.Ai_PVT	TH.PVT_glu_Gpr26.KO250	TH.PVT_glu_Gpr26.KO250_f135_453	130919-3	Gpr26.KO250.Ai3	cs.n	TH	glu	PVT	130	135	F	23.5	2.6	1	truseq	61968761	61895946	95	0.00117503	0.21499	0.0447954	0.709846	0.0303083	6.04401e-05	49360612
454	Gpr26.KO250.Ai3_LGd_f135_454	Gpr26.KO250.Ai_LGd	TH.LGd_glu_Gpr26.KO250	TH.LGd_glu_Gpr26.KO250_f135_454	130919-3	Gpr26.KO250.Ai3	cs.n	TH	glu	LGd	126	135	F	23.5	2.52	1	truseq	56126463	56069622	95	0.00101273	0.20304	0.0403586	0.726496	0.0300619	4.33568e-05	45406572
455	Gpr26.KO250.Ai3_PVT_f38_455	Gpr26.KO250.Ai_PVT	TH.PVT_glu_Gpr26.KO250	TH.PVT_glu_Gpr26.KO250_m38_455	130919-3	Gpr26.KO250.Ai3	cs.n	TH	glu	PVT	130	38	M	25.3	2.6	1	truseq	48551883	48500922	95	0.00104962	0.232339	0.0429608	0.692955	0.0316592	8.64107e-05	37924127
456	Gpr26.KO250.Ai3_LGd_f38_456	Gpr26.KO250.Ai_LGd	TH.LGd_glu_Gpr26.KO250	TH.LGd_glu_Gpr26.KO250_m38_456	130919-3	Gpr26.KO250.Ai3	cs.n	TH	glu	LGd	122	38	M	25.35	2.44	1	truseq	47055246	47000959	95	0.00115369	0.217558	0.0412417	0.709734	0.0313879	7.77005e-05	37421801
458	PBAU_COAp_m59_458	PBAU_COAp	OLF.COAp_glu_PBAU	OLF.COAp_glu_PBAU_m59_458	130919-3	PBAU	cs.n	OLF	glu	COAp	32	59	M	23.7	0.64	1	truseq	39923375	39866884	95	0.00141499	0.23346	0.0542786	0.681962	0.0301426	0.000156696	30538981
459	PBAU_COAp_m49_459	PBAU_COAp	OLF.COAp_glu_PBAU	OLF.COAp_glu_PBAU_m49_459	130919-3	PBAU	cs.n	OLF	glu	COAp	72	49	M	23.9	1.44	1	truseq	53909216	53864713	95	0.000825517	0.17374	0.0432606	0.755029	0.027932	3.86153e-05	44870020
460	PBAU_COAp_m36_460	PBAU_COAp	OLF.COAp_glu_PBAU	OLF.COAp_glu_PBAU_m36_460	130919-3	PBAU	cs.n	OLF	glu	COAp	132	36	M	21.8	2.64	1	truseq	53552303	53509169	95	0.000805456	0.200652	0.0431807	0.727224	0.0288124	0.000131174	43184452
466	Grp.KH288.Ai14_@Sp.L.Sp_f184_466	Grp.KH288.Ai_@Sp.L.Sp	@Sp.L.Sp_glu_Grp.KH288	@Sp.L.Sp_glu_Grp.KH288_f184_466	130919-3	Grp.KH288.Ai14	cs.n	others	glu	@Sp.L.Sp	125	184	F	24.4	2.5	1	truseq	68187353	67732558	95	0.00666979	0.13712	0.0504323	0.789237	0.0231688	4.20477e-05	58462714
467	Grp.KH288.Ai14_@Sp.L.Sp_f184_467	Grp.KH288.Ai_@Sp.L.Sp	@Sp.L.Sp_glu_Grp.KH288	@Sp.L.Sp_glu_Grp.KH288_f184_467	130919-3	Grp.KH288.Ai14	cs.n	others	glu	@Sp.L.Sp	105	184	F	28	2.1	1	truseq	67202215	66794381	95	0.00606876	0.149223	0.052581	0.77474	0.0233765	7.89887e-05	56652667
468	Grp.KH288.Ai14_@Sp.L.Sp_m33_468	Grp.KH288.Ai_@Sp.L.Sp	@Sp.L.Sp_glu_Grp.KH288	@Sp.L.Sp_glu_Grp.KH288_m33_468	130919-3	Grp.KH288.Ai14	cs.n	others	glu	@Sp.L.Sp	140	33	M	21.5	2.8	1	truseq	56702501	56379625	95	0.00569421	0.141562	0.0552358	0.779684	0.0234556	6.28241e-05	48119119
469	Np219Amig01.SC.inj_@Re.RGC_m60_469	Np219Amig01.SC.inj_@Re.RGC	@Re.RGC_glu_Np219Amig01	@Re.RGC_glu_Np219Amig01_m60_469	130919-4	Np219Amig01	cs.n	others	glu	@Re.RGC	64	60	M		1.28	1	truseq	57048624	56883145	95	0.00290067	0.197984	0.0506252	0.72028	0.0310288	8.22739e-05	46064386	SC projecting
470	Np219Amig01.SC.inj_@Re.RGC_m60_470	Np219Amig01.SC.inj_@Re.RGC	@Re.RGC_glu_Np219Amig01	@Re.RGC_glu_Np219Amig01_m60_470	130919-4	Np219Amig01	cs.n	others	glu	@Re.RGC	60	60	M		1.2	1	truseq	48731755	48623933	95	0.00221256	0.179961	0.0533237	0.734641	0.0319889	8.49787e-05	40162039	SC projecting
471	Np219Amig01.SC.inj_@Re.RGC_m60_471	Np219Amig01.SC.inj_@Re.RGC	@Re.RGC_glu_Np219Amig01	@Re.RGC_glu_Np219Amig01_m60_471	130919-4	Np219Amig01	cs.n	others	glu	@Re.RGC	73	60	M		1.46	1	truseq	52908985	52754726	95	0.00291555	0.194474	0.0512877	0.722556	0.0315122	0.00017026	42898487	SC projecting
472	Np219Amig01.SC.inj_@Re.RGC_m60_472	Np219Amig01.SC.inj_@Re.RGC	@Re.RGC_glu_Np219Amig01	@Re.RGC_glu_Np219Amig01_m60_472	130919-4	Np219Amig01	cs.n	others	glu	@Re.RGC	57	60	M		1.14	1	truseq	53478473	53337259	95	0.00264058	0.214421	0.0532398	0.699416	0.0328695	5.43897e-05	42315656	SC projecting
474	Pvalb-Cre.Ai32_SSp@L2..3_m204_474	Pvalb-Cre.Ai_SSp@L2..3	Isocortex.SSp@L2..3_GABA_Pvalb-Cre	Isocortex.SSp@L2..3_GABA_Pvalb-Cre_m204_474	130919-4	Pvalb-Cre.Ai32	cs.n	Isocortex	GABA	SSp@L2..3	82	204	M	28.1	1.64	1	truseq	49550319	49496504	95	0.00108607	0.251461	0.055041	0.666018	0.0273538	0.000125746	36718859
475	Pvalb-Cre.Ai32_SSp@L2..3_f205_475	Pvalb-Cre.Ai_SSp@L2..3	Isocortex.SSp@L2..3_GABA_Pvalb-Cre	Isocortex.SSp@L2..3_GABA_Pvalb-Cre_f205_475	130919-4	Pvalb-Cre.Ai32	cs.n	Isocortex	GABA	SSp@L2..3	123	205	F	20.6	2.46	1	truseq	54077651	54014537	95	0.0011671	0.227383	0.048508	0.696386	0.0276657	5.69476e-05	41737749
476	Pvalb-Cre.Ai32_@ependyma_f205_476	Pvalb-Cre.Ai_@ependyma	@ependyma__Pvalb-Cre	@ependyma__Pvalb-Cre_f205_476	130919-4	Pvalb-Cre.Ai32	cs.o	others		@ependyma	52	205	F	20.6	1.04	1	truseq	47871700	47528106	95	0.00717739	0.318127	0.0716288	0.586934	0.0229831	0.000326165	31425096
477	Pvalb-Cre.Ai32_SSp@L2..3_f206_477	Pvalb-Cre.Ai_SSp@L2..3	Isocortex.SSp@L2..3_GABA_Pvalb-Cre	Isocortex.SSp@L2..3_GABA_Pvalb-Cre_f206_477	130919-4	Pvalb-Cre.Ai32	cs.n	Isocortex	GABA	SSp@L2..3	99	206	F	18.1	1.98	1	truseq	56681016	56638160	95	0.000756091	0.26143	0.0464059	0.665758	0.0263711	3.52766e-05	41832308
478	Pvalb-Cre.Ai32_@ependyma_f206_478	Pvalb-Cre.Ai_@ependyma	@ependyma__Pvalb-Cre	@ependyma__Pvalb-Cre_f206_478	130919-4	Pvalb-Cre.Ai32	cs.o	others		@ependyma	84	206	F	18.1	1.68	1	truseq	57075755	56710651	95	0.00639683	0.375613	0.0488169	0.550554	0.024901	0.00011504	35696310
479	PBAV_MOBmi_m129_479	PBAV_MOBmi	OLF.MOBmi_GABA_PBAV	OLF.MOBmi_GABA_PBAV_m129_479	130919-4	PBAV	cs.n	OLF	GABA	MOBmi	132	129	M	28.5	2.64	1	truseq	54758302	54389974	95	0.00672643	0.153216	0.0589293	0.763301	0.024486	6.7347e-05	45658092
480	PBAV_MOBmi_m130_480	PBAV_MOBmi	OLF.MOBmi_GABA_PBAV	OLF.MOBmi_GABA_PBAV_m130_480	130919-4	PBAV	cs.n	OLF	GABA	MOBmi	132	130	M	28.5	2.64	1	truseq	53244885	52789425	95	0.00855406	0.218403	0.0745176	0.679853	0.0271676	5.88944e-05	40336578
481	Sla.KJ319.Ai14_CUL4..5mo_f50_481	Sla.KJ319.Ai_CUL4..5mo	CB.CUL4, 5mo_GABA_Sla.KJ319	CB.CUL4, 5mo_GABA_Sla.KJ319_f50_481	130919-4	Sla.KJ319.Ai14	cs.n	CB	GABA	CUL4..5mo	92	50	F	24.3	1.84	1	truseq	67181380	66757211	95	0.00631379	0.12519	0.0532666	0.794605	0.0268855	5.28332e-05	58559017
482	Sla.KJ319.Ai14_CUL4..5mo_m43_482	Sla.KJ319.Ai_CUL4..5mo	CB.CUL4, 5mo_GABA_Sla.KJ319	CB.CUL4, 5mo_GABA_Sla.KJ319_m43_482	130919-4	Sla.KJ319.Ai14	cs.n	CB	GABA	CUL4..5mo	97	43	M	21.5	1.94	1	truseq	66089169	65741662	95	0.00525815	0.154025	0.0563162	0.764188	0.025403	6.77652e-05	55459958
483	PBAV_MOBmi_m76_483	PBAV_MOBmi	OLF.MOBmi_GABA_PBAV	OLF.MOBmi_GABA_PBAV_m76_483	130919-4	PBAV	cs.n	OLF	GABA	MOBmi	99	76	M	26	1.98	1	truseq	53396958	52971343	95	0.00797077	0.15888	0.0653857	0.750021	0.0256344	7.87407e-05	44003793
520	Rbp4.KL100.Ai14_@Sp.L.Sp_m87_520	Rbp4.KL100.Ai_@Sp.L.Sp	@Sp.L.Sp_GABA_Rbp4.KL100	@Sp.L.Sp_GABA_Rbp4.KL100_m87_520	130927-1	Rbp4.KL100.Ai14	cs.n	others	GABA	@Sp.L.Sp	104	87	M	26.4	2.08	1	truseq	27928786	27765684	95	0.00583992	0.191607	0.047035	0.736745	0.0245672	4.55959e-05	22627437
526	Pvalb-Cre.Ai32_@ependyma_f219_526	Pvalb-Cre.Ai_@ependyma	@ependyma__Pvalb-Cre	@ependyma__Pvalb-Cre_f219_526	130927-1	Pvalb-Cre.Ai32	cs.o	others		@ependyma	128	219	F	21.3	2.56	1	truseq	46949361	46259892	95	0.0146854	0.312364	0.0526285	0.610974	0.0239858	4.77736e-05	32191378
527	Gng7.KH67.Ai14_chpl_m59_527	chpl	chpl__Gng7.KH67	chpl__Gng7.KH67_m59_527	130927-1	Gng7.KH67.Ai14	cs.o	others		chpl	136	59	M	29.1	2.72	1	truseq	43035298	42915264	95	0.0027892	0.319062	0.0509485	0.604819	0.0251081	6.24719e-05	29049579
536	GIN.p55.fed_CA3_m58_536	GIN.p55.fed_CA3	HPF.CA3_GABA_GIN	HPF.CA3_GABA_GIN_m58_536	140124-1	GIN	cs.n	HPF	GABA	CA3	59	58	M	27.4	1	1	truseq	31124645	31120691	100	0.000127038	0.252512	0.0590515	0.665828	0.0225605	4.74283e-05	22666986
537	GIN.p55.fed_CA3_m58_537	GIN.p55.fed_CA3	HPF.CA3_GABA_GIN	HPF.CA3_GABA_GIN_m58_537	140124-1	GIN	cs.n	HPF	GABA	CA3	51	58	M	28.5	1	1	truseq	39607435	39600541	100	0.000174058	0.217164	0.0741178	0.684874	0.0237957	4.92418e-05	29721044
538	GIN.p55.fed_CA3_m58_538	GIN.p55.fed_CA3	HPF.CA3_GABA_GIN	HPF.CA3_GABA_GIN_m58_538	140124-1	GIN	cs.n	HPF	GABA	CA3	101	58	M	27.2	1	1	truseq	36152599	36147456	100	0.000142258	0.253369	0.0604076	0.661293	0.0248702	6.09172e-05	26372917
539	Gng7.KH67.Ai3_IG_m123_539	Gng7.KH67.Ai_IG	HPF.IG_glu_Gng7.KH67	HPF.IG_glu_Gng7.KH67_m123_539	140124-1	Gng7.KH67.Ai3	cs.n	HPF	glu	IG	46	123	M	32.4	1	1	truseq	26813551	26808692	100	0.000181214	0.140703	0.0631544	0.777935	0.0181581	4.92751e-05	22264955
540	Gng7.KH67.Ai3_IG_m123_540	Gng7.KH67.Ai_IG	HPF.IG_glu_Gng7.KH67	HPF.IG_glu_Gng7.KH67_m123_540	140124-1	Gng7.KH67.Ai3	cs.n	HPF	glu	IG	62	123	M	41.1	1	1	truseq	37293247	37285814	100	0.000199312	0.169005	0.0592084	0.750952	0.0206695	0.000165183	30246913
542	Grm2.MR90.Ai14_DG_f129_542	Grm2.MR90.Ai_DG	HPF.DG_glu_Grm2.MR90	HPF.DG_glu_Grm2.MR90_f129_542	140124-1	Grm2.MR90.Ai14	cs.n	HPF	glu	DG	105	129	F	21.9	1	1	truseq	46125791	46108059	100	0.000384427	0.16911	0.053478	0.756484	0.0208245	0.000103518	37644211
543	Grm2.MR90.Ai14_DG_f129_543	Grm2.MR90.Ai_DG	HPF.DG_glu_Grm2.MR90	HPF.DG_glu_Grm2.MR90_f129_543	140124-1	Grm2.MR90.Ai14	cs.n	HPF	glu	DG	110	129	F	27.4	1	1	truseq	46260315	46251491	100	0.000190747	0.217006	0.0496624	0.712069	0.0212024	6.01278e-05	35711881
544	Grm2.MR90.Ai14_DG_m107_544	Grm2.MR90.Ai_DG	HPF.DG_glu_Grm2.MR90	HPF.DG_glu_Grm2.MR90_m107_544	140124-1	Grm2.MR90.Ai14	cs.n	HPF	glu	DG	70	107	M	30.6	1	1	truseq	46386707	46373027	100	0.000294912	0.128179	0.0487017	0.804084	0.0189365	9.84193e-05	39888929
556	wt.beads.M1.inj_Ssp-bfd@L2..3_f66_556	wt.beads.M1.inj_Ssp-bfd@L2..3	Isocortex.SSp-bfd@L2..3_glu_wt.beads	Isocortex.SSp-bfd@L2..3_glu_wt.beads_f66_556	140124-2	wt.beads	cs.n	Isocortex	glu	SSp-bfd@L2..3	14	66	F	18.4	1	1	truseq	31728396	31666648	100	0.00194614	0.198806	0.0617462	0.719229	0.0195214	0.000697358	24574774
573	wt.beads.S2.inj_Ssp-bfd@L2..3_m88_573	wt.beads.S2.inj_Ssp-bfd@L2..3	Isocortex.SSp-bfd@L2..3_glu_wt.beads	Isocortex.SSp-bfd@L2..3_glu_wt.beads_m88_573	140124-3	wt.beads	cs.n	Isocortex	glu	SSp-bfd@L2..3	70	88	M	25.8	1	1	truseq	45251230	45007104	100	0.0053949	0.294232	0.0475137	0.63773	0.0204736	5.10808e-05	31434595
575	wt.beads.M1.inj_Ssp-bfd@L2..3_m90_575	wt.beads.M1.inj_Ssp-bfd@L2..3	Isocortex.SSp-bfd@L2..3_glu_wt.beads	Isocortex.SSp-bfd@L2..3_glu_wt.beads_m90_575	140124-3	wt.beads	cs.n	Isocortex	glu	SSp-bfd@L2..3	102	90	M	27.9	1	1	truseq	39419268	39194478	100	0.00570254	0.309852	0.0467023	0.627743	0.015638	6.39886e-05	26575780
576	wt.beads.S2.inj_Ssp-bfd@L2..3_m90_576	wt.beads.S2.inj_Ssp-bfd@L2..3	Isocortex.SSp-bfd@L2..3_glu_wt.beads	Isocortex.SSp-bfd@L2..3_glu_wt.beads_m90_576	140124-3	wt.beads	cs.n	Isocortex	glu	SSp-bfd@L2..3	93	90	M	27.9	1	1	truseq	40276632	40074709	100	0.0050134	0.230275	0.0470192	0.705689	0.0169272	8.97075e-05	30418758
578	wt.beads.S2.inj_Ssp-bfd@L2..3_f97_578	wt.beads.S2.inj_Ssp-bfd@L2..3	Isocortex.SSp-bfd@L2..3_glu_wt.beads	Isocortex.SSp-bfd@L2..3_glu_wt.beads_f97_578	140124-3	wt.beads	cs.n	Isocortex	glu	SSp-bfd@L2..3	112	97	F	22.7	1	1	truseq	52838438	52595131	100	0.00460474	0.288408	0.044002	0.646329	0.0211951	6.60708e-05	37253416
581	wt.beads.LGN.inj_@Re.RGC__581	wt.beads.LGN.inj_@Re.RGC	@Re.RGC_glu_wt.beads	@Re.RGC_glu_wt.beads_f_581	140124-4	wt.beads	cs.n	others	glu	@Re.RGC	78		F		1	1	truseq	40583715	40354528	100	0.00564727	0.162844	0.0698942	0.743078	0.0241452	3.85087e-05	32954246	LGN projecting
582	wt.beads.LGN.inj_@Re.RGC__582	wt.beads.LGN.inj_@Re.RGC	@Re.RGC_glu_wt.beads	@Re.RGC_glu_wt.beads_m_582	140124-4	wt.beads	cs.n	others	glu	@Re.RGC	98		M		1	1	truseq	33729121	33577805	100	0.00448621	0.19658	0.0434364	0.736157	0.0237952	3.10622e-05	27098468	LGN projecting
583	wt.beads.LGN.inj_@Re.RGC__583	wt.beads.LGN.inj_@Re.RGC	@Re.RGC_glu_wt.beads	@Re.RGC_glu_wt.beads_f_583	140124-4	wt.beads	cs.n	others	glu	@Re.RGC	68		F		1	1	truseq	40920387	40497755	100	0.0103282	0.174899	0.0497054	0.751047	0.0242619	8.61035e-05	33584201	LGN projecting
584	wt.beads.LGN.inj_@Re.RGC__584	wt.beads.LGN.inj_@Re.RGC	@Re.RGC_glu_wt.beads	@Re.RGC_glu_wt.beads_m_584	140124-4	wt.beads	cs.n	others	glu	@Re.RGC	90		M		1	1	truseq	36591333	36450914	100	0.00383749	0.237381	0.0488187	0.689868	0.023896	3.69264e-05	27706899	LGN projecting
585	wt.beads.LGNSC.inj_@Re.RGC__585	wt.beads.LGNSC.inj_@Re.RGC	@Re.RGC_glu_wt.beads	@Re.RGC_glu_wt.beads_f_585	140124-4	wt.beads	cs.n	others	glu	@Re.RGC	29		F		1	1	truseq	39241345	38688028	100	0.0141004	0.180856	0.062087	0.732941	0.0240709	4.5854e-05	31530105	LGN &SC projecting
586	wt.beads.LGNSC.inj_@Re.RGC__586	wt.beads.LGNSC.inj_@Re.RGC	@Re.RGC_glu_wt.beads	@Re.RGC_glu_wt.beads_f_586	140124-4	wt.beads	cs.n	others	glu	@Re.RGC	30		F		1	1	truseq	33634931	33073229	100	0.0167	0.177976	0.0696243	0.729383	0.0229745	4.24513e-05	26829116	LGN &SC projecting
588	wt.beads.S2.inj_Ssp-bfd@L2..3_f66_588	wt.beads.S2.inj_Ssp-bfd@L2..3	Isocortex.SSp-bfd@L2..3_glu_wt.beads	Isocortex.SSp-bfd@L2..3_glu_wt.beads_f66_588	140124-4	wt.beads	cs.n	Isocortex	glu	SSp-bfd@L2..3	57	66	F	20.3	1	1	truseq	36111838	35938769	100	0.00479258	0.12782	0.0792342	0.771747	0.0210663	0.000133199	30059134
589	Adora2a.KG139.Ai14_CP_m179_589	Adora2a.KG139.Ai_CP	STR.CP_GABA_Adora2a.KG139	STR.CP_GABA_Adora2a.KG139_m179_589	140124-4	Adora2a.KG139.Ai14	cs.n	STR	GABA	CP	95	179	M	28.3	1	1	truseq	58202406	57899609	100	0.00520248	0.168643	0.039345	0.770584	0.0214015	2.65805e-05	48349462
590	Adora2a.KG139.Ai14_OT_m179_590	Adora2a.KG139.Ai_OT	STR.OT_GABA_Adora2a.KG139	STR.OT_GABA_Adora2a.KG139_m179_590	140124-4	Adora2a.KG139.Ai14	cs.n	STR	GABA	OT	102	179	M	28.3	1	1	truseq	100223500	99746666	100	0.00475771	0.132983	0.0458285	0.801429	0.0197232	3.65325e-05	85984031
591	Drd3.KI198.Ai14_MOBgr_f123_591	Drd3.KI198.Ai_MOBgr	OLF.MOBgr_GABA_Drd3.KI198	OLF.MOBgr_GABA_Drd3.KI198_f123_591	140124-4	Drd3.KI198.Ai14	cs.n	OLF	GABA	MOBgr	67	123	F	25.5	1	1	truseq	44330294	43064406	100	0.0285558	0.125973	0.060768	0.79403	0.0191946	3.44832e-05	37898268
593	Drd3.KI198.Ai14_MOBgr_f124_593	Drd3.KI198.Ai_MOBgr	OLF.MOBgr_GABA_Drd3.KI198	OLF.MOBgr_GABA_Drd3.KI198_f124_593	140124-4	Drd3.KI198.Ai14	cs.n	OLF	GABA	MOBgr	80	124	F	21.5	1	1	truseq	62494537	61628214	100	0.0138624	0.107536	0.0527232	0.821577	0.0181291	3.38644e-05	54788295
594	Drd3.KI198.Ai14_MOBgr_f124_594	Drd3.KI198.Ai_MOBgr	OLF.MOBgr_GABA_Drd3.KI198	OLF.MOBgr_GABA_Drd3.KI198_f124_594	140124-4	Drd3.KI198.Ai14	cs.n	OLF	GABA	MOBgr	68	124	F	24	1	1	truseq	48582330	47242149	100	0.0275858	0.117519	0.062605	0.800905	0.0189137	5.68348e-05	41832492
595	Crh.ZJH.Ai14_PVH_m51_595	Crh.ZJH.Ai_PVH	HY.PVH_glu_Crh.ZJH	HY.PVH_glu_Crh.ZJH_m51_595	140124-4	Crh.ZJH.Ai14	cs.n	HY	glu	PVH	105	51	M	24.9	1	1	truseq	51126492	50861421	100	0.00518461	0.203264	0.0498799	0.721444	0.0253559	5.70963e-05	40649054
596	Crh.ZJH.Ai14_CEAm_m51_596	Crh.ZJH.Ai_CEAm	STR.CEAm_GABA_Crh.ZJH	STR.CEAm_GABA_Crh.ZJH_m51_596	140124-4	Crh.ZJH.Ai14	cs.n	STR	GABA	CEAm	44	51	M	24.9	1	1	truseq	40474533	39998294	100	0.0117664	0.162268	0.0477891	0.767456	0.0224344	5.30273e-05	33681990
635	Sla.KJ303.Ai3_COAp_f126_635	Sla.KJ303.Ai_COAp	OLF.COAp_glu_Sla.KJ303	OLF.COAp_glu_Sla.KJ303_f126_635	130800-1	Sla.KJ303.Ai3	cs.n	OLF	glu	COAp	153	126	F	26.4	3.06	1	truseq	34437769	34432832	100	0.00014336	0.288006	0.0452081	0.636721	0.0300221	4.2808e-05	24745476
639	Chrnb4.OL57.Ai14_ACB_m87_639	Chrnb4.OL57.Ai_ACB	STR.ACB_GABA_Chrnb4.OL57	STR.ACB_GABA_Chrnb4.OL57_m87_639	130800-1	Chrnb4.OL57.Ai14	cs.n	STR	GABA	ACB	112	87	M	30.2	2.24	1	truseq	26703643	26697378	100	0.000234612	0.152528	0.0577348	0.764559	0.0238938	0.00128503	22192381
640	Chrnb4.OL57.Ai14_ACB_m87_640	Chrnb4.OL57.Ai_ACB	STR.ACB_GABA_Chrnb4.OL57	STR.ACB_GABA_Chrnb4.OL57_m87_640	130800-1	Chrnb4.OL57.Ai14	cs.n	STR	GABA	ACB	96	87	M	28.9	1.92	1	truseq	28994529	28987218	100	0.000252151	0.195048	0.0503807	0.727385	0.0271233	6.29588e-05	23254844
641	Rbp4.KL100.Ai14_MOp5_m45_641	Rbp4.KL100.Ai_MOp5	Isocortex.MOp5_glu_Rbp4.KL100	Isocortex.MOp5_glu_Rbp4.KL100_m45_641	130800-1	Rbp4.KL100.Ai14	cs.n	Isocortex	glu	MOp5	146	45	M	19.4	2.92	1	truseq	29549599	29544617	100	0.000168598	0.260557	0.050721	0.659077	0.029577	6.81342e-05	21837394
642	GIN_NTSge_m75_642	GIN_NTSge	MY.NTSge_GABA_GIN	MY.NTSge_GABA_GIN_m75_642	130800-1	GIN	cs.n	MY	GABA	NTSge	158	75	M	30.6	3.16	1	truseq	29771198	29700039	100	0.0023902	0.259165	0.0467774	0.662917	0.031095	4.54882e-05	22332275
643	GIN_AP_m75_643	GIN_AP	MY.AP_GABA_GIN	MY.AP_GABA_GIN_m75_643	130800-1	GIN	cs.n	MY	GABA	AP	55	75	M	30.6	1.1	1	truseq	36959321	36954053	100	0.000142535	0.279225	0.054389	0.637418	0.0289084	5.94793e-05	26575526
644	GIN_NTSge_m76_644	GIN_NTSge	MY.NTSge_GABA_GIN	MY.NTSge_GABA_GIN_m76_644	130800-1	GIN	cs.n	MY	GABA	NTSge	45	76	M	28.7	0.9	1	truseq	30610007	30605801	100	0.000137406	0.338627	0.0690494	0.565879	0.0262901	0.000154219	19605786
645	GIN_AP_m76_645	GIN_AP	MY.AP_GABA_GIN	MY.AP_GABA_GIN_m76_645	130800-1	GIN	cs.n	MY	GABA	AP	126	76	M	28.7	2.52	1	truseq	24368058	24364246	100	0.000156434	0.250219	0.0514552	0.669623	0.0286531	4.9704e-05	18293445
646	GIN_NTSge_m76_646	GIN_NTSge	MY.NTSge_GABA_GIN	MY.NTSge_GABA_GIN_m76_646	130800-1	GIN	cs.n	MY	GABA	NTSge	148	76	M	31.3	2.96	1	truseq	32677213	32672281	100	0.000150931	0.31997	0.0570296	0.593218	0.0297044	7.80784e-05	22101872
647	GIN_AP_m76_647	GIN_AP	MY.AP_GABA_GIN	MY.AP_GABA_GIN_m76_647	130800-1	GIN	cs.n	MY	GABA	AP	150	76	M	31.3	3	1	truseq	30001643	29967358	100	0.00114277	0.240179	0.0550633	0.676097	0.0285858	7.47146e-05	22709348
651	Syt17.NO14.Ai3_DG_m83_651	Syt17.NO14.Ai_DG	HPF.DG_glu_Syt17.NO14	HPF.DG_glu_Syt17.NO14_m83_651	130800-2	Syt17.NO14.Ai3	cs.n	HPF	glu	DG	152	83	M	32	3.04	1	truseq	40345576	40342728	100	7.05901e-05	0.222839	0.0457525	0.705214	0.0261263	6.79924e-05	31336940
652	Syt17.NO14.Ai3_DG_m83_652	Syt17.NO14.Ai_DG	HPF.DG_glu_Syt17.NO14	HPF.DG_glu_Syt17.NO14_m83_652	130800-2	Syt17.NO14.Ai3	cs.n	HPF	glu	DG	156	83	M	31.3	3.12	1	truseq	35388321	35383660	100	0.00013171	0.185363	0.0566232	0.731419	0.0264882	0.000106575	28471282
653	Syt17.NO14.Ai3_DG_m84_653	Syt17.NO14.Ai_DG	HPF.DG_glu_Syt17.NO14	HPF.DG_glu_Syt17.NO14_m84_653	130800-2	Syt17.NO14.Ai3	cs.n	HPF	glu	DG	148	84	M	32.4	2.96	1	truseq	32253909	32248737	100	0.000160353	0.213338	0.0500901	0.710904	0.0254907	0.000177433	25250750
654	Syt17.NO14.Ai3_AOBgr_m61_654	Syt17.NO14.Ai_AOBgr	OLF.AOBgr_GABA_Syt17.NO14	OLF.AOBgr_GABA_Syt17.NO14_m61_654	130800-2	Syt17.NO14.Ai3	cs.n	OLF	GABA	AOBgr	115	61	M	30.9	2.3	1	truseq	32989176	32816694	100	0.00522844	0.229232	0.0685267	0.67877	0.0232501	0.000221259	24631159
655	Syt17.NO14.Ai3_AOBgr_m61_655	Syt17.NO14.Ai_AOBgr	OLF.AOBgr_GABA_Syt17.NO14	OLF.AOBgr_GABA_Syt17.NO14_m61_655	130800-2	Syt17.NO14.Ai3	cs.n	OLF	GABA	AOBgr	118	61	M	30.9	2.36	1	truseq	31086771	31079541	100	0.000232575	0.228185	0.0666396	0.682874	0.0221455	0.000155826	23197031
659	Syt17.NO14.Ai3_AOBgr_m65_659	Syt17.NO14.Ai_AOBgr	OLF.AOBgr_GABA_Syt17.NO14	OLF.AOBgr_GABA_Syt17.NO14_m65_659	130800-2	Syt17.NO14.Ai3	cs.n	OLF	GABA	AOBgr	118	65	M	29.1	2.36	1	truseq	31133022	30929208	100	0.00654655	0.171509	0.0559973	0.747967	0.0232419	0.00128429	25412847
660	Gng7.KH67.Ai3_ACB_m88_660	Gng7.KH67.Ai_ACB	STR.ACB_GABA_Gng7.KH67	STR.ACB_GABA_Gng7.KH67_m88_660	130800-2	Gng7.KH67.Ai3	cs.n	STR	GABA	ACB	156	88	M	33.8	3.12	1	truseq	27938199	27908391	100	0.00106693	0.251489	0.0480577	0.672239	0.0281303	8.35591e-05	20962336
661	Gng7.KH67.Ai3_ACB_m89_661	Gng7.KH67.Ai_ACB	STR.ACB_GABA_Gng7.KH67	STR.ACB_GABA_Gng7.KH67_m89_661	130800-2	Gng7.KH67.Ai3	cs.n	STR	GABA	ACB	107	89	M	31.6	2.14	1	truseq	25534325	25478284	100	0.00219473	0.244317	0.0678803	0.659743	0.0279148	0.00014424	18874380
662	Gng7.KH67.Ai3_ACB_m89_662	Gng7.KH67.Ai_ACB	STR.ACB_GABA_Gng7.KH67	STR.ACB_GABA_Gng7.KH67_m89_662	130800-2	Gng7.KH67.Ai3	cs.n	STR	GABA	ACB	145	89	M	26.9	2.9	1	truseq	31703447	31676548	100	0.000848457	0.240606	0.0514521	0.679676	0.0281865	7.927e-05	24037713
663	Syt17.NO14.Ai3_PBl_m48_663	Syt17.NO14.Ai_PBl	P.PBl_glu_Syt17.NO14	P.PBl_glu_Syt17.NO14_m48_663	130800-2	Syt17.NO14.Ai3	cs.n	P	glu	PBl	92	48	M	27.5	1.84	1	truseq	35722697	35680697	100	0.00117572	0.300798	0.0479194	0.617208	0.0339864	8.80028e-05	25457848
664	Syt17.NO14.Ai3_PBl_m48_664	Syt17.NO14.Ai_PBl	P.PBl_glu_Syt17.NO14	P.PBl_glu_Syt17.NO14_m48_664	130800-2	Syt17.NO14.Ai3	cs.n	P	glu	PBl	39	48	M	28.3	0.78	1	truseq	41960908	41947223	100	0.000326137	0.207875	0.0572456	0.707608	0.027157	0.000114763	32976804
665	Syt17.NO14.Ai3_PBl_m48_665	Syt17.NO14.Ai_PBl	P.PBl_glu_Syt17.NO14	P.PBl_glu_Syt17.NO14_m48_665	130800-2	Syt17.NO14.Ai3	cs.n	P	glu	PBl	142	48	M	26.7	2.84	1	truseq	36932506	36904100	100	0.000769133	0.287205	0.0427886	0.634203	0.0356904	0.000113836	27076927
666	Syt17.NO14.Ai3_VTA_f49_666	Syt17.NO14.Ai_VTA	MB.VTA_glu,DA_Syt17.NO14	MB.VTA_glu,DA_Syt17.NO14_f49_666	130800-2	Syt17.NO14.Ai3	cs.n	MB	glu,DA	VTA	60	49	F	20.8	1.2	1	truseq	39388646	39034077	100	0.00900181	0.22576	0.0510319	0.692667	0.0304488	9.25089e-05	30752289
667	Grm2.MR90.Ai14_SFO_m116_667	Grm2.MR90.Ai_SFO	HY.SFO_glu,GABA_Grm2.MR90	HY.SFO_glu,GABA_Grm2.MR90_m116_667	140417-1	Grm2.MR90.Ai14	cs.n	HY	glu,GABA	SFO	73	116	M	34.55	1	1	truseq	48978888	48681707	100	0.00606753	0.210005	0.0500468	0.716154	0.0237635	3.01961e-05	38465478
668	Slc6a5.KF109.Ai9_CUL4..5pu_m178_668	Slc6a5.KF109.Ai_CUL4..5pu	CB.CUL4, 5pu_GABA_Slc6a5.KF109	CB.CUL4, 5pu_GABA_Slc6a5.KF109_m178_668	140417-1	Slc6a5.KF109.Ai9	cs.n	CB	GABA	CUL4..5pu	97	178	M	31.9	1	1	truseq	50712387	50682103	100	0.000597172	0.265973	0.0370852	0.67293	0.0239831	2.86294e-05	37315776
669	Slc6a5.KF109.Ai9_CUL4..5pu_m178_669	Slc6a5.KF109.Ai_CUL4..5pu	CB.CUL4, 5pu_GABA_Slc6a5.KF109	CB.CUL4, 5pu_GABA_Slc6a5.KF109_m178_669	140417-1	Slc6a5.KF109.Ai9	cs.n	CB	GABA	CUL4..5pu	112	178	M	32.3	1	1	truseq	38882936	38852391	100	0.000785563	0.242035	0.0389387	0.694607	0.0243849	3.34857e-05	29509166
670	Slc6a5.KF109.Ai9_CUL4..5pu_m88_670	Slc6a5.KF109.Ai_CUL4..5pu	CB.CUL4, 5pu_GABA_Slc6a5.KF109	CB.CUL4, 5pu_GABA_Slc6a5.KF109_m88_670	140417-1	Slc6a5.KF109.Ai9	cs.n	CB	GABA	CUL4..5pu	108	88	M	27.4	1	1	truseq	33697936	33675382	100	0.000669299	0.253594	0.0413337	0.681884	0.0231474	4.14249e-05	25049105
671	Slc6a5.KF109.Ai9_PAG_m88_671	Slc6a5.KF109.Ai_PAG	MB.PAG_GABA_Slc6a5.KF109	MB.PAG_GABA_Slc6a5.KF109_m88_671	140417-1	Slc6a5.KF109.Ai9	cs.n	MB	GABA	PAG	102	88	M	27.4	1	1	truseq	39689121	39549604	100	0.00351525	0.254266	0.0493899	0.673922	0.0223925	3.04175e-05	29357715
672	Slc6a5.KF109.Ai9_PAG_m89_672	Slc6a5.KF109.Ai_PAG	MB.PAG_GABA_Slc6a5.KF109	MB.PAG_GABA_Slc6a5.KF109_m89_672	140417-1	Slc6a5.KF109.Ai9	cs.n	MB	GABA	PAG	112	89	M	25.7	1	1	truseq	29561544	29477789	100	0.00283324	0.24639	0.0475024	0.681566	0.0244977	4.36939e-05	22245489
673	Slc6a5.KF109.Ai9_PAG_f131_673	Slc6a5.KF109.Ai_PAG	MB.PAG_GABA_Slc6a5.KF109	MB.PAG_GABA_Slc6a5.KF109_f131_673	140417-1	Slc6a5.KF109.Ai9	cs.n	MB	GABA	PAG	83	131	F	22.4	1	1	truseq	30880737	30784267	100	0.00312395	0.212857	0.0472232	0.716786	0.0230806	5.37937e-05	24220354
675	Gng7.KH67.Ai14_RSPv_m65_675	Gng7.KH67.Ai_RSPv	Isocortex.RSPv_glu,GABA_Gng7.KH67	Isocortex.RSPv_glu,GABA_Gng7.KH67_m65_675	140417-1	Gng7.KH67.Ai14	cs.n	Isocortex	glu,GABA	RSPv	120	65	M	28.8	1	1	truseq	58010680	57679854	100	0.00570285	0.18411	0.0557885	0.736506	0.0235117	8.40675e-05	46621413
676	Gng7.KH67.Ai14_RSPv_m65_676	Gng7.KH67.Ai_RSPv	Isocortex.RSPv_glu,GABA_Gng7.KH67	Isocortex.RSPv_glu,GABA_Gng7.KH67_m65_676	140417-1	Gng7.KH67.Ai14	cs.n	Isocortex	glu,GABA	RSPv	115	65	M	30.7	1	1	truseq	64887205	64503586	100	0.00591209	0.186733	0.068087	0.724034	0.021053	9.21499e-05	50941814
677	Gng7.KH67.Ai3_RSPv_m112_677	Gng7.KH67.Ai_RSPv	Isocortex.RSPv_glu,GABA_Gng7.KH67	Isocortex.RSPv_glu,GABA_Gng7.KH67_m112_677	140417-1	Gng7.KH67.Ai3	cs.n	Isocortex	glu,GABA	RSPv	118	112	M	33.4	1	1	truseq	43218121	42926372	100	0.00675062	0.204429	0.054066	0.717149	0.024176	0.00017982	33975649
678	Gng7.KH67.Ai3_IG_m112_678	Gng7.KH67.Ai_IG	HPF.IG_glu_Gng7.KH67	HPF.IG_glu_Gng7.KH67_m112_678	140417-1	Gng7.KH67.Ai3	cs.n	HPF	glu	IG	52	112	M	34.4	1	1	truseq	44952885	44663072	100	0.00644704	0.205056	0.0452004	0.726716	0.0229569	7.08863e-05	35565573
679	Adora2a.KG139.Ai14_CP_m177_679	Adora2a.KG139.Ai_CP	STR.CP_GABA_Adora2a.KG139	STR.CP_GABA_Adora2a.KG139_m177_679	140417-1	Adora2a.KG139.Ai14	cs.n	STR	GABA	CP	110	177	M	29.2	1	1	truseq	53304679	53051852	100	0.00474306	0.18912	0.052481	0.737829	0.0205171	5.29859e-05	42441035
680	Adora2a.KG139.Ai14_OT_m177_680	Adora2a.KG139.Ai_OT	STR.OT_GABA_Adora2a.KG139	STR.OT_GABA_Adora2a.KG139_m177_680	140417-1	Adora2a.KG139.Ai14	cs.n	STR	GABA	OT	106	177	M	29.2	1	1	truseq	48630389	48428810	100	0.00414512	0.18714	0.0485157	0.744676	0.0196044	6.35159e-05	38938766
681	Adora2a.KG139.Ai14_CP_m178_681	Adora2a.KG139.Ai_CP	STR.CP_GABA_Adora2a.KG139	STR.CP_GABA_Adora2a.KG139_m178_681	140417-1	Adora2a.KG139.Ai14	cs.n	STR	GABA	CP	106	178	M	37.5	1	1	truseq	54885966	54613058	100	0.00497227	0.211364	0.0497613	0.716942	0.0217754	0.0001576	42722799
682	Adora2a.KG139.Ai14_OT_m178_682	Adora2a.KG139.Ai_OT	STR.OT_GABA_Adora2a.KG139	STR.OT_GABA_Adora2a.KG139_m178_682	140417-1	Adora2a.KG139.Ai14	cs.n	STR	GABA	OT	73	178	M	37.5	1	1	truseq	47647448	47425808	100	0.00465167	0.188869	0.0530934	0.738495	0.0191611	0.000381817	37850464
811	HSD2-Cre.Ai14_MM_m112_811	HSD2-Cre.Ai_MM	HY.MM_glu_HSD2-Cre	HY.MM_glu_HSD2-Cre_m112_811	140603-1	HSD2-Cre.Ai14	cs.n	HY	glu	MM	112	112	M	19.2	1	1	truseq	19011643	18993513	100	0.000953626	0.231714	0.0456932	0.700251	0.0223027	3.97504e-05	14522683
812	Mpp3.KG118.Ai32_PG_f40_812	Mpp3.KG118.Ai_PG	P.PG_glu_Mpp3.KG118	P.PG_glu_Mpp3.KG118_f40_812	140603-1	Mpp3.KG118.Ai32	cs.n	P	glu	PG	55	40	F	16.9	1	1	truseq	21441724	21420101	100	0.00100845	0.321636	0.0589529	0.597003	0.0223731	3.58542e-05	14153093
813	Cx3cr1-GFP_MOp5_m80_813	Cx3cr1-GFP_MOp5	Isocortex.MOp5__Cx3cr1-GFP	Isocortex.MOp5__Cx3cr1-GFP_m80_813	140603-1	Cx3cr1-GFP	cs.o	Isocortex		MOp5	152	80	M	24.9	1	1	truseq	17883359	17776544	100	0.00597287	0.18465	0.0600365	0.734735	0.0205112	6.68296e-05	14299097
814	Cx3cr1-GFP_UVU_m80_814	Cx3cr1-GFP_UVU	CB.UVU__Cx3cr1-GFP	CB.UVU__Cx3cr1-GFP_m80_814	140603-1	Cx3cr1-GFP	cs.o	CB		UVU	94	80	M	24.9	1	1	truseq	17733721	17731132	100	0.000145993	0.12844	0.0600934	0.789581	0.021831	5.40857e-05	15213679
815	Cx3cr1-GFP_MOp5_m87_815	Cx3cr1-GFP_MOp5	Isocortex.MOp5__Cx3cr1-GFP	Isocortex.MOp5__Cx3cr1-GFP_m87_815	140603-1	Cx3cr1-GFP	cs.o	Isocortex		MOp5	160	87	M	24.4	1	1	truseq	20182519	19981120	100	0.00997888	0.191368	0.0592629	0.726048	0.0232319	8.9034e-05	16125270
816	Cx3cr1-GFP_UVU_m87_816	Cx3cr1-GFP_UVU	CB.UVU__Cx3cr1-GFP	CB.UVU__Cx3cr1-GFP_m87_816	140603-1	Cx3cr1-GFP	cs.o	CB		UVU	125	87	M	24.4	1	1	truseq	14344747	14342646	100	0.000146465	0.17521	0.060559	0.739651	0.0244428	0.000137213	11689733
817	Cx3cr1-GFP_MOp5_m89_817	Cx3cr1-GFP_MOp5	Isocortex.MOp5__Cx3cr1-GFP	Isocortex.MOp5__Cx3cr1-GFP_m89_817	140603-1	Cx3cr1-GFP	cs.o	Isocortex		MOp5	156	89	M	24.9	1	1	truseq	17147777	17145453	100	0.000135528	0.151649	0.0587384	0.769339	0.020156	0.000117291	14254762
818	Cx3cr1-GFP_UVU_m89_818	Cx3cr1-GFP_UVU	CB.UVU__Cx3cr1-GFP	CB.UVU__Cx3cr1-GFP_m89_818	140603-1	Cx3cr1-GFP	cs.o	CB		UVU	140	89	M	24.9	1	1	truseq	16353974	16180814	100	0.0105883	0.164289	0.090116	0.7222	0.0214267	0.00196801	12949528
819	wt.beads.M1.inj_Ssp-bfd@L2..3_f103_819	wt.beads.M1.inj_Ssp-bfd@L2..3	Isocortex.SSp-bfd@L2..3_glu_wt.beads	Isocortex.SSp-bfd@L2..3_glu_wt.beads_f103_819	140603-1	wt.beads	cs.n	Isocortex	glu	SSp-bfd@L2..3	106	103	F	24.5	1	1	truseq	11731516	11702136	100	0.00250437	0.283606	0.054472	0.642924	0.0189621	3.55491e-05	8162770
821	wt.beads.M1.inj_Ssp-bfd@L2..3_f68_821	wt.beads.M1.inj_Ssp-bfd@L2..3	Isocortex.SSp-bfd@L2..3_glu_wt.beads	Isocortex.SSp-bfd@L2..3_glu_wt.beads_f68_821	140603-1	wt.beads	cs.n	Isocortex	glu	SSp-bfd@L2..3	101	68	F	20.5	1	1	truseq	16493080	16415818	100	0.00468451	0.22922	0.0488085	0.701345	0.0205772	4.88553e-05	12516521
822	wt.beads.M1.inj_Ssp-bfd@L2..3_f69_822	wt.beads.M1.inj_Ssp-bfd@L2..3	Isocortex.SSp-bfd@L2..3_glu_wt.beads	Isocortex.SSp-bfd@L2..3_glu_wt.beads_f69_822	140603-1	wt.beads	cs.n	Isocortex	glu	SSp-bfd@L2..3	70	69	F	19.55	1	1	truseq	13979310	13836630	100	0.0102065	0.159409	0.0580574	0.760447	0.0220484	3.83041e-05	11498817
823	wt.beads.M1.inj_Ssp-bfd@L2..3_m75_823	wt.beads.M1.inj_Ssp-bfd@L2..3	Isocortex.SSp-bfd@L2..3_glu_wt.beads	Isocortex.SSp-bfd@L2..3_glu_wt.beads_m72.5_823	140603-1	wt.beads	cs.n	Isocortex	glu	SSp-bfd@L2..3	101	72.5	M	26.3	1	1	truseq	16677084	16594508	100	0.00495147	0.212792	0.0513513	0.715015	0.0207825	5.9598e-05	12892699
824	TCLU_@bloodvessel_m81_824	TCLU_@bloodvessel	@bloodvessel__TCLU	@bloodvessel__TCLU_m81_824	140603-1	TCLU	cs.o	others		@bloodvessel	98	81	M	28.7	1	1	truseq	19136274	18560588	100	0.0300835	0.31978	0.137225	0.523438	0.0194608	9.68181e-05	11306275
825	TCLU_@bloodvessel_m181_825	TCLU_@bloodvessel	@bloodvessel__TCLU	@bloodvessel__TCLU_m181_825	140603-1	TCLU	cs.o	others		@bloodvessel	92	181	M	27.4	1	1	truseq	15455338	14996112	100	0.0297131	0.359253	0.0873929	0.533345	0.0182003	0.0018096	9259046
826	TCLU_@bloodvessel_m181_826	TCLU_@bloodvessel	@bloodvessel__TCLU	@bloodvessel__TCLU_m181_826	140603-1	TCLU	cs.o	others		@bloodvessel	80	181	M	29.3	1	1	truseq	17480974	17055387	100	0.0243457	0.28754	0.122932	0.570375	0.0188934	0.000259038	11119333
926	Rbp4.KL100.Ai14_AOBmi_m101_926	Rbp4.KL100.Ai_AOBmi	OLF.AOBmi_glu_Rbp4.KL100	OLF.AOBmi_glu_Rbp4.KL100_m101_926	140417-2	Rbp4.KL100.Ai14	cs.n	OLF	glu	AOBmi	90	101	M	27.7	10	1	truseq	30994540	29835276	100	0.0374022	0.198312	0.0510253	0.724363	0.0262601	3.88466e-05	24942320
927	Rbp4.KL100.Ai14_AOBmi_m104_927	Rbp4.KL100.Ai_AOBmi	OLF.AOBmi_glu_Rbp4.KL100	OLF.AOBmi_glu_Rbp4.KL100_m104_927	140417-2	Rbp4.KL100.Ai14	cs.n	OLF	glu	AOBmi	114	104	M	31.3	10	1	truseq	29933896	29308239	100	0.0209013	0.205187	0.0459042	0.722644	0.0261678	9.73446e-05	23955141
928	Rbp4.KL100.Ai14_AOBmi_m104_928	Rbp4.KL100.Ai_AOBmi	OLF.AOBmi_glu_Rbp4.KL100	OLF.AOBmi_glu_Rbp4.KL100_m104_928	140417-2	Rbp4.KL100.Ai14	cs.n	OLF	glu	AOBmi	116	104	M	33.3	10	1	truseq	34622535	33689108	100	0.0269601	0.181461	0.0461789	0.745685	0.0265039	0.000170708	28538832
930	Rbp4.KL100.Ai14_@Sp.L.Sp_m105_930	Rbp4.KL100.Ai_@Sp.L.Sp	@Sp.L.Sp_GABA_Rbp4.KL100	@Sp.L.Sp_GABA_Rbp4.KL100_m105_930	140417-2	Rbp4.KL100.Ai14	cs.n	others	GABA	@Sp.L.Sp	63	105	M	33.4	10	1	truseq	48938735	44631346	100	0.0880159	0.180227	0.0575634	0.739332	0.0225756	0.000301783	40216084
931	NPY-hrGFP.p55.fed_ARH_m51_931	NPY-hrGFP.p55.fed_ARH	HY.ARH_GABA_NPY-hrGFP	HY.ARH_GABA_NPY-hrGFP_m51_931	140417-2	NPY-hrGFP	cs.n	HY	GABA	ARH	87	51	M	20.6	10	1	truseq	49989436	47879288	100	0.0422119	0.224309	0.0443574	0.711341	0.0199396	5.2695e-05	38980516
932	NPY-hrGFP.p55.fed_ARH_m55_932	NPY-hrGFP.p55.fed_ARH	HY.ARH_GABA_NPY-hrGFP	HY.ARH_GABA_NPY-hrGFP_m55_932	140417-2	NPY-hrGFP	cs.n	HY	GABA	ARH	102	55	M	22.9	10	1	truseq	47805024	45051996	100	0.0575887	0.311463	0.0435236	0.62201	0.0229212	8.21051e-05	33721957
1059	Orexin-Cre.Ai14_CEAm_f182_1059	Orexin-Cre.Ai_CEAm	STR.CEAm_GABA_Orexin-Cre	STR.CEAm_GABA_Orexin-Cre_f182_1059	140702-1	Orexin-Cre.Ai14	cs.n	STR	GABA	CEAm	85	182	F	21.9	1	1	truseq	52069335	51729864	100	0.0065196	0.209139	0.0806569	0.691848	0.018288	6.85871e-05	38884390
1060	TH-GFP_MV_m191_1060	TH-GFP_MV	MY.MV_GABA_TH-GFP	MY.MV_GABA_TH-GFP_m191_1060	140702-1	TH-GFP	cs.n	MY	GABA	MV	27	191	M	32.8	1	1	truseq	29204558	28463003	100	0.0253918	0.244352	0.0845629	0.647781	0.023149	0.000154973	21064793
1062	Orexin-Cre.Ai14_CEAm_f172_1062	Orexin-Cre.Ai_CEAm	STR.CEAm_GABA_Orexin-Cre	STR.CEAm_GABA_Orexin-Cre_f172_1062	140702-1	Orexin-Cre.Ai14	cs.n	STR	GABA	CEAm	54	172	F	22.4	1	1	truseq	31299254	30919990	100	0.0121174	0.268941	0.0704323	0.639452	0.0211009	7.43855e-05	21982626
1064	TH-GFP_MV_f252_1064	TH-GFP_MV	MY.MV_GABA_TH-GFP	MY.MV_GABA_TH-GFP_f252_1064	140702-1	TH-GFP	cs.n	MY	GABA	MV	21	252	F	30.8	1	1	truseq	26968845	25976454	100	0.0367977	0.29208	0.0865346	0.600618	0.0206144	0.000152138	18131956
1083	Gpr26.KO250.Ai14_SSp@L5_m97_1083	Gpr26.KO250.Ai_SSp@L5	Isocortex.SSp@L5_glu_Gpr26.KO250	Isocortex.SSp@L5_glu_Gpr26.KO250_m97_1083	140801-1	Gpr26.KO250.Ai14	cs.n	Isocortex	glu	SSp@L5	60	97	M	28.8	1	1	truseq	31608005	31572887	100	0.00111105	0.198651	0.043451	0.734817	0.0230518	2.91706e-05	25291842
1084	Gpr26.KO250.Ai14_SSp@L5_m97_1084	Gpr26.KO250.Ai_SSp@L5	Isocortex.SSp@L5_glu_Gpr26.KO250	Isocortex.SSp@L5_glu_Gpr26.KO250_m97_1084	140801-1	Gpr26.KO250.Ai14	cs.n	Isocortex	glu	SSp@L5	106	97	M	28.8	1	1	truseq	25291923	25174448	100	0.00464476	0.162004	0.0562617	0.758278	0.0234314	2.45884e-05	20921123
1085	Gpr26.KO250.Ai14_SSp@L5_m97_1085	Gpr26.KO250.Ai_SSp@L5	Isocortex.SSp@L5_glu_Gpr26.KO250	Isocortex.SSp@L5_glu_Gpr26.KO250_m97_1085	140801-1	Gpr26.KO250.Ai14	cs.n	Isocortex	glu	SSp@L5	48	97	M	30	1	1	truseq	27527332	27430795	100	0.00350695	0.222197	0.0461078	0.710205	0.0214617	2.92008e-05	21240947
1086	Gpr26.KO250.Ai14_SSp@L5_m97_1086	Gpr26.KO250.Ai_SSp@L5	Isocortex.SSp@L5_glu_Gpr26.KO250	Isocortex.SSp@L5_glu_Gpr26.KO250_m97_1086	140801-1	Gpr26.KO250.Ai14	cs.n	Isocortex	glu	SSp@L5	132	97	M	30	1	1	truseq	35251020	35152802	100	0.00278625	0.179053	0.0483625	0.748636	0.0239059	4.25571e-05	28835211
1088	Rbp4.KL100.Ai14_@OE.MOE.up_m209_1088	Rbp4.KL100.Ai_@OE.MOE.up	@OE.MOE.up_glu_Rbp4.KL100	@OE.MOE.up_glu_Rbp4.KL100_m209_1088	140801-1	Rbp4.KL100.Ai14	cs.n	others	glu	@OE.MOE.up	155	209	M	30.2	1	1	truseq	30847074	30716145	100	0.00424445	0.144917	0.0508349	0.788297	0.0159253	2.54264e-05	25766171
1089	Rbp4.KL100.Ai14_@OE.MOE.up_m212_1089	Rbp4.KL100.Ai_@OE.MOE.up	@OE.MOE.up_glu_Rbp4.KL100	@OE.MOE.up_glu_Rbp4.KL100_m212_1089	140801-1	Rbp4.KL100.Ai14	cs.n	others	glu	@OE.MOE.up	142	212	M	33.6	1	1	truseq	28259803	28102747	100	0.00555758	0.125574	0.0426628	0.816081	0.0154555	0.000226775	24349977
1091	Cdhr1.KG66.Ai14_MOBgl_m132_1091	Cdhr1.KG66.Ai_MOBgl	OLF.MOBgl_glu_Cdhr1.KG66	OLF.MOBgl_glu_Cdhr1.KG66_m132_1091	140801-1	Cdhr1.KG66.Ai14	cs.n	OLF	glu	MOBgl	117	132	M	34.1	1	1	truseq	43269168	43198343	100	0.00163685	0.285334	0.0502141	0.643868	0.0205504	3.35661e-05	30499841
1092	Cdhr1.KG66.Ai14_MOBgl_m132_1092	Cdhr1.KG66.Ai_MOBgl	OLF.MOBgl_glu_Cdhr1.KG66	OLF.MOBgl_glu_Cdhr1.KG66_m132_1092	140801-1	Cdhr1.KG66.Ai14	cs.n	OLF	glu	MOBgl	120	132	M	35.4	1	1	truseq	34618534	34521140	100	0.00281335	0.275285	0.0484607	0.654881	0.0213293	4.46683e-05	24871570
1093	Cdhr1.KG66.Ai14_MOBgl_m133_1093	Cdhr1.KG66.Ai_MOBgl	OLF.MOBgl_glu_Cdhr1.KG66	OLF.MOBgl_glu_Cdhr1.KG66_m133_1093	140801-1	Cdhr1.KG66.Ai14	cs.n	OLF	glu	MOBgl	105	133	M	44.8	1	1	truseq	37501069	37446445	100	0.0014566	0.270412	0.0513129	0.659524	0.0187205	2.9856e-05	26906122
1135	HSD2-Cre.Ai14_CUL4..5gr_m196_1135	HSD2-Cre.Ai_CUL4..5gr	CB.CUL4, 5gr_glu_HSD2-Cre	CB.CUL4, 5gr_glu_HSD2-Cre_m196_1135	140905-2	HSD2-Cre.Ai14	cs.n	CB	glu	CUL4..5gr	542	196	M	32.9	1	1	truseq	22223979	22095910	95	0.00576265	0.0716172	0.0622165	0.851491	0.0145941	8.1101e-05	19955275
1136	HSD2-Cre.Ai14_CUL4..5gr_m196_1136	HSD2-Cre.Ai_CUL4..5gr	CB.CUL4, 5gr_glu_HSD2-Cre	CB.CUL4, 5gr_glu_HSD2-Cre_m196_1136	140905-2	HSD2-Cre.Ai14	cs.n	CB	glu	CUL4..5gr	780	196	M	32.9	1	1	truseq	49353661	49075485	95	0.00563638	0.0736467	0.0477309	0.863108	0.0154612	5.36113e-05	44996320
1143	P157_IG_m24_1143	P157_IG	HPF.IG_glu_P157	HPF.IG_glu_P157_m24_1143	140905-2	P157	cs.n	HPF	glu	IG	102	24	M	13.2	1	1	truseq	41531341	41109323	95	0.0101614	0.258998	0.0544225	0.666186	0.0203048	8.83984e-05	30190487
1144	P157_IG_f24_1144	P157_IG	HPF.IG_glu_P157	HPF.IG_glu_P157_f24_1144	140905-2	P157	cs.n	HPF	glu	IG	105	24	F	11.6	1	1	truseq	51989635	51559673	95	0.00827015	0.24501	0.0557622	0.678321	0.0208443	6.22967e-05	38432705
1145	P157_AI_m24_1145	P157_AI	Isocortex.AI_glu_P157	Isocortex.AI_glu_P157_f24_1145	140905-2	P157	cs.n	Isocortex	glu	AI	61	24	F	13.2	1	1	truseq	42650299	42117170	95	0.0125	0.226057	0.0613083	0.690794	0.0211527	0.00068808	32120809
1163	Drd3.KI198.Ai14_isl_m125_1163	Drd3.KI198.Ai_isl	STR.isl_GABA_Drd3.KI198	STR.isl_GABA_Drd3.KI198_m125_1163	140910-1	Drd3.KI198.Ai14	cs.n	STR	GABA	isl	186	125	M	28.7	3.72	1	truseq	50367067	49855512	100	0.0101565	0.157424	0.0635898	0.757443	0.0215065	3.65256e-05	41377954
1164	Drd3.KI198.Ai14_isl_f71_1164	Drd3.KI198.Ai_isl	STR.isl_GABA_Drd3.KI198	STR.isl_GABA_Drd3.KI198_f71_1164	140910-1	Drd3.KI198.Ai14	cs.n	STR	GABA	isl	152	71	F	21.5	3.04	1	truseq	68241986	67278777	100	0.0141146	0.139374	0.0689033	0.769081	0.0225877	5.41627e-05	57037191
1165	Drd3.KI198.Ai14_islm_f71_1165	Drd3.KI198.Ai_islm	STR.islm_GABA_Drd3.KI198	STR.islm_GABA_Drd3.KI198_f71_1165	140910-1	Drd3.KI198.Ai14	cs.n	STR	GABA	islm	162	71	F	21.5	3.24	1	truseq	48472433	47681971	100	0.0163075	0.179288	0.069026	0.727267	0.024394	2.53974e-05	38747164
1166	Drd3.KI198.Ai14_isl_f74_1166	Drd3.KI198.Ai_isl	STR.isl_GABA_Drd3.KI198	STR.isl_GABA_Drd3.KI198_f74_1166	140910-1	Drd3.KI198.Ai14	cs.n	STR	GABA	isl	160	74	F	20.7	3.2	1	truseq	44614897	43897103	100	0.0160887	0.142898	0.0701293	0.765335	0.0215434	9.44709e-05	37082971
1167	Drd3.KI198.Ai14_islm_f74_1167	Drd3.KI198.Ai_islm	STR.islm_GABA_Drd3.KI198	STR.islm_GABA_Drd3.KI198_f74_1167	140910-1	Drd3.KI198.Ai14	cs.n	STR	GABA	islm	140	74	F	20.7	2.8	1	truseq	45933651	45271680	100	0.0144115	0.150076	0.06484	0.761032	0.0239994	5.25052e-05	38248823
1168	Drd3.KI198.Ai14_isl_m67_1168	Drd3.KI198.Ai_isl	STR.isl_GABA_Drd3.KI198	STR.isl_GABA_Drd3.KI198_m67_1168	140910-1	Drd3.KI198.Ai14	cs.n	STR	GABA	isl	220	67	M	28.7	4.4	1	truseq	41739584	41225262	100	0.0123222	0.163275	0.0648451	0.747651	0.0241155	0.000113838	34191360
1169	Drd3.KI198.Ai14_chpl_m67_1169	chpl	chpl__Drd3.KI198	chpl__Drd3.KI198_m67_1169	140910-1	Drd3.KI198.Ai14	cs.o	others		chpl	137	67	M	28.7	2.74	1	truseq	41311546	41220587	100	0.00220178	0.329424	0.0503074	0.595439	0.0247942	3.60742e-05	27441539
1184	TCLU_@ependyma_f99_1184	TCLU_@ependyma	@ependyma__TCLU	@ependyma__TCLU_f99_1184	141001-3	TCLU	cs.o	others		@ependyma	96	99	F	22	1	1	truseq	36007206	35439897	93	0.0157554	0.392648	0.05996	0.524774	0.0225572	6.07507e-05	21465733
1185	TCLU_@ependyma_f99_1185	TCLU_@ependyma	@ependyma__TCLU	@ependyma__TCLU_f99_1185	141001-3	TCLU	cs.o	others		@ependyma	107	99	F	20.7	1	1	truseq	43451748	42968400	93	0.0111238	0.461142	0.0470643	0.470132	0.0209402	0.00072153	23196767
1186	TCLU_@ependyma_f100_1186	TCLU_@ependyma	@ependyma__TCLU	@ependyma__TCLU_f100_1186	141001-3	TCLU	cs.o	others		@ependyma	98	100	F	21.45	1	1	truseq	37184515	36569791	93	0.0165317	0.424124	0.0453404	0.511226	0.0192107	9.89068e-05	21324703
1187	TCLC_@OE.MOE_m336_1187	TCLC_@OE.MOE	@OE.MOE_glu_TCLC	@OE.MOE_glu_TCLC_m336_1187	141001-3	TCLC	cs.n	others	glu	@OE.MOE	115	336	M	35.6	1	1	truseq	39155738	38657773	93	0.0127175	0.197348	0.0555446	0.727376	0.0196759	5.45557e-05	30788615
1188	TCLC_@OE.MOE_f329_1188	TCLC_@OE.MOE	@OE.MOE_glu_TCLC	@OE.MOE_glu_TCLC_f329_1188	141001-3	TCLC	cs.n	others	glu	@OE.MOE	152	329	F	24.4	1	1	truseq	33963432	33391752	93	0.0168322	0.200013	0.0592948	0.720687	0.0199353	6.99873e-05	26519237
1189	Rbp4.KL100.Ai14_@OE.MOE.low_m195_1189	Rbp4.KL100.Ai_@OE.MOE.low	@OE.MOE.low_glu_Rbp4.KL100	@OE.MOE.low_glu_Rbp4.KL100_m195_1189	141001-3	Rbp4.KL100.Ai14	cs.n	others	glu	@OE.MOE.low	122	195	M	30.8	1	1	truseq	41211184	40748666	93	0.0112231	0.168634	0.0502542	0.762363	0.0186944	5.39404e-05	33728625
1190	Rbp4.KL100.Ai14_@OE.MOE.low_m198_1190	Rbp4.KL100.Ai_@OE.MOE.low	@OE.MOE.low_glu_Rbp4.KL100	@OE.MOE.low_glu_Rbp4.KL100_m198_1190	141001-3	Rbp4.KL100.Ai14	cs.n	others	glu	@OE.MOE.low	152	198	M	29.7	1	1	truseq	131593798	130559590	93	0.00785909	0.166102	0.0474031	0.76891	0.0175205	6.53112e-05	108108888
1191	TCLC_@OE.VNO_m336_1191	TCLC_@OE.VNO	@OE.VNO_glu_TCLC	@OE.VNO_glu_TCLC_m336_1191	141001-3	TCLC	cs.n	others	glu	@OE.VNO	132	336	M	32.5	1	1	truseq	43894401	43422371	93	0.0107538	0.228194	0.0526666	0.697038	0.0220567	4.53223e-05	33453539
1192	TCLC_@OE.VNO_m336_1192	TCLC_@OE.VNO	@OE.VNO_glu_TCLC	@OE.VNO_glu_TCLC_m336_1192	141001-3	TCLC	cs.n	others	glu	@OE.VNO	128	336	M	35.6	1	1	truseq	41390809	41023311	93	0.00887873	0.212719	0.0483652	0.716866	0.022014	3.57845e-05	32340258
1193	TCLC_@OE.VNO_f329_1193	TCLC_@OE.VNO	@OE.VNO_glu_TCLC	@OE.VNO_glu_TCLC_f329_1193	141001-3	TCLC	cs.n	others	glu	@OE.VNO	175	329	F	24.4	1	1	truseq	45953883	45687420	93	0.00579849	0.213849	0.0434447	0.719918	0.0227541	3.397e-05	36061786
1209	Slc6a5.KF109.Ai9_PVT_m161_1209	Slc6a5.KF109.Ai_PVT	TH.PVT_glu_Slc6a5.KF109	TH.PVT_glu_Slc6a5.KF109_m161_1209	141001-2	Slc6a5.KF109.Ai9	cs.n	TH	glu	PVT	108	161	M	29.4	1	1	truseq	63818272	63721592	93	0.00151493	0.196007	0.0463251	0.732847	0.0237788	0.00104247	51139536
1227	Slc6a5.KF109.Ai9_AD_m159_1227	Slc6a5.KF109.Ai_AD	TH.AD_glu_Slc6a5.KF109	TH.AD_glu_Slc6a5.KF109_m159_1227	141031-2	Slc6a5.KF109.Ai9	cs.n	TH	glu	AD	108	159	M	29	1	1	truseq	31617768	31554097	95	0.00201377	0.276717	0.0469796	0.650157	0.0261169	2.9188e-05	22922185
1228	Slc6a5.KF109.Ai9_AD_m161_1228	Slc6a5.KF109.Ai_AD	TH.AD_glu_Slc6a5.KF109	TH.AD_glu_Slc6a5.KF109_m161_1228	141031-2	Slc6a5.KF109.Ai9	cs.n	TH	glu	AD	122	161	M	29.4	1	1	truseq	43155950	43111349	95	0.00103348	0.254171	0.0484291	0.672578	0.0247863	3.51184e-05	32169499
1229	Slc6a5.KF109.Ai9_AD_f118_1229	Slc6a5.KF109.Ai_AD	TH.AD_glu_Slc6a5.KF109	TH.AD_glu_Slc6a5.KF109_f118_1229	141031-2	Slc6a5.KF109.Ai9	cs.n	TH	glu	AD	110	118	F	21.2	1	1	truseq	49112327	49021233	95	0.00185481	0.217503	0.0488464	0.708029	0.0255866	3.54744e-05	38500843
1230	Slc6a5.KF109.Ai9_PVT_f118_1230	Slc6a5.KF109.Ai_PVT	TH.PVT_glu_Slc6a5.KF109	TH.PVT_glu_Slc6a5.KF109_f118_1230	141031-2	Slc6a5.KF109.Ai9	cs.n	TH	glu	PVT	112	118	F	21.2	1	1	truseq	40452765	40382831	95	0.00172878	0.249434	0.0418373	0.679518	0.0291732	3.71445e-05	30871421
1231	Slc6a5.KF109.Ai9_AV_m161_1231	Slc6a5.KF109.Ai_AV	TH.AV_glu_Slc6a5.KF109	TH.AV_glu_Slc6a5.KF109_m161_1231	141031-2	Slc6a5.KF109.Ai9	cs.n	TH	glu	AV	118	161	M	29.4	1	1	truseq	44600767	44538427	95	0.00139773	0.205092	0.0424474	0.728314	0.0241173	2.95026e-05	35476291
1232	Slc6a5.KF109.Ai9_AV_f118_1232	Slc6a5.KF109.Ai_AV	TH.AV_glu_Slc6a5.KF109	TH.AV_glu_Slc6a5.KF109_f118_1232	141031-2	Slc6a5.KF109.Ai9	cs.n	TH	glu	AV	115	118	F	21.2	1	1	truseq	40047572	40037797	95	0.000244085	0.202576	0.0618692	0.710905	0.0246256	2.41272e-05	31215707
1234	Slc6a5.KF109.Ai9_AV_f119_1234	Slc6a5.KF109.Ai_AV	TH.AV_glu_Slc6a5.KF109	TH.AV_glu_Slc6a5.KF109_f119_1234	141031-2	Slc6a5.KF109.Ai9	cs.n	TH	glu	AV	50	119	F	22.3	1	1	truseq	36811265	36709672	95	0.00275983	0.196263	0.0503453	0.730202	0.0231145	7.55387e-05	29264300
1235	Slc6a5.KF109.Ai9_LGd_f119_1235	Slc6a5.KF109.Ai_LGd	TH.LGd_glu_Slc6a5.KF109	TH.LGd_glu_Slc6a5.KF109_f119_1235	141031-2	Slc6a5.KF109.Ai9	cs.n	TH	glu	LGd	48	119	F	22.3	1	1	truseq	43225244	42652984	95	0.013239	0.161583	0.145924	0.668291	0.0241419	5.97614e-05	31958224
1236	Slc6a5.KF109.Ai9_LGd_m120_1236	Slc6a5.KF109.Ai_LGd	TH.LGd_glu_Slc6a5.KF109	TH.LGd_glu_Slc6a5.KF109_m120_1236	141031-2	Slc6a5.KF109.Ai9	cs.n	TH	glu	LGd	70	120	M	24.7	1	1	truseq	51971271	51785774	95	0.00356922	0.208096	0.0504934	0.72207	0.0193066	3.42179e-05	40472098
1237	Slc6a5.KF109.Ai9_LGd_m75_1237	Slc6a5.KF109.Ai_LGd	TH.LGd_glu_Slc6a5.KF109	TH.LGd_glu_Slc6a5.KF109_m75_1237	141031-2	Slc6a5.KF109.Ai9	cs.n	TH	glu	LGd	106	75	M	25.5	1	1	truseq	43023377	42857302	95	0.00386011	0.210346	0.0516393	0.714006	0.0239691	3.99699e-05	33635262
1238	Slc6a5.KF109.Ai9_LGd_m98_1238	Slc6a5.KF109.Ai_LGd	TH.LGd_glu_Slc6a5.KF109	TH.LGd_glu_Slc6a5.KF109_m98_1238	141031-2	Slc6a5.KF109.Ai9	cs.n	TH	glu	LGd	110	98	M	28	1	1	truseq	52091214	51993549	95	0.00187488	0.197459	0.0412695	0.735066	0.0261769	2.86382e-05	42071137
1240	Slc6a5.KF109.Ai9_PAG_f91_1240	Slc6a5.KF109.Ai_PAG	MB.PAG_GABA_Slc6a5.KF109	MB.PAG_GABA_Slc6a5.KF109_f91_1240	141031-2	Slc6a5.KF109.Ai9	cs.n	MB	GABA	PAG	93	91	F	23.4	1	1	truseq	67600932	67307400	95	0.00434213	0.220198	0.0503642	0.706151	0.0232577	2.89864e-05	52404136
1266	Pomc-GFP.p55.fed_ARH_m69_1266	Pomc-GFP.p55.fed_ARH	HY.ARH_glu_Pomc-GFP	HY.ARH_glu_Pomc-GFP_m69_1266	141212-1	Pomc-GFP	cs.n	HY	glu	ARH	80	69	M	21.8	1	1	truseq	41707470	41644862	94	0.00150112	0.259465	0.0424015	0.675095	0.0230153	2.38685e-05	30909663
1268	Ntsr1.GN209.SC.inj_@Re.RGC_m42_1268	Ntsr1.GN209.SC.inj_@Re.RGC	@Re.RGC_glu_Ntsr1.GN209	@Re.RGC_glu_Ntsr1.GN209_m42_1268	141212-1	Ntsr1.GN209	cs.n	others	glu	@Re.RGC	16	42	M		1	1	truseq	34300263	33756452	94	0.0158544	0.148965	0.0711643	0.757492	0.0223435	3.54303e-05	28261499	SC projecting
1269	AVP.QZ20.Ai14_SCH_m40_1269	AVP.QZ20.Ai_SCH	HY.SCH_GABA_AVP.QZ20	HY.SCH_GABA_AVP.QZ20_m40_1269	141212-1	AVP.QZ20.Ai14	cs.n	HY	GABA	SCH	138	40	M	24.3	1	1	truseq	58738615	58612720	94	0.00214331	0.144561	0.0426138	0.793363	0.0194264	3.5436e-05	49957061
1270	AVP.QZ20.Ai14_SCH_m40_1270	AVP.QZ20.Ai_SCH	HY.SCH_GABA_AVP.QZ20	HY.SCH_GABA_AVP.QZ20_m40_1270	141212-1	AVP.QZ20.Ai14	cs.n	HY	GABA	SCH	130	40	M	24	1	1	truseq	48954723	48812040	94	0.00291459	0.12402	0.0530694	0.802984	0.0198884	3.82897e-05	42186495
1271	AVP.QZ20.Ai14_PVHp_f74_1271	AVP.QZ20.Ai_PVHp	HY.PVHp_glu_AVP.QZ20	HY.PVHp_glu_AVP.QZ20_f74_1271	141212-1	AVP.QZ20.Ai14	cs.n	HY	glu	PVHp	112	74	F	21.1	1	1	truseq	51059625	50946688	94	0.00221186	0.23818	0.0470475	0.688723	0.0260187	3.10324e-05	38918037
1272	AVP.QZ20.Ai14_SCH_f74_1272	AVP.QZ20.Ai_SCH	HY.SCH_GABA_AVP.QZ20	HY.SCH_GABA_AVP.QZ20_f74_1272	141212-1	AVP.QZ20.Ai14	cs.n	HY	GABA	SCH	152	74	F	21.1	1	1	truseq	42779261	42658442	94	0.00282424	0.143197	0.0442647	0.792637	0.0198633	3.81167e-05	36404969
1273	P159_CUL4..5mo_f42_1273	P159_CUL4..5mo	CB.CUL4, 5mo_GABA_P159	CB.CUL4, 5mo_GABA_P159_f42_1273	141212-1	P159	cs.n	CB	GABA	CUL4..5mo	60	42	F	19	1	1	truseq	47990976	47327147	94	0.0138324	0.153849	0.0709608	0.75204	0.0231159	3.36382e-05	39524883
1274	P159_CUL4..5mo_m42_1274	P159_CUL4..5mo	CB.CUL4, 5mo_GABA_P159	CB.CUL4, 5mo_GABA_P159_m42_1274	141212-1	P159	cs.n	CB	GABA	CUL4..5mo	126	42	M	18.5	1	1	truseq	47657529	47333980	94	0.00678904	0.223714	0.0595265	0.690586	0.0261255	4.86965e-05	36499750
1275	P159_CUL4..5mo_f42_1275	P159_CUL4..5mo	CB.CUL4, 5mo_GABA_P159	CB.CUL4, 5mo_GABA_P159_f42_1275	141212-1	P159	cs.n	CB	GABA	CUL4..5mo	61	42	F	12.8	1	1	truseq	53556255	52597732	94	0.0178975	0.189706	0.0649715	0.720131	0.0250337	0.000157763	42658502
1305	Gpr26.KO250.Ai14_Ctx.L7_m139_1305	Gpr26.KO250.Ai_Ctx.L7	Isocortex.SSp@L7_glu_Gpr26.KO250	Isocortex.SSp@L7_glu_Gpr26.KO250_m141_1305	150116-1	Gpr26.KO250.Ai14	cs.n	Isocortex	glu	SSp@L7	128	141	M	32.28	1	1	truseq	42377597	42314249	95	0.00149485	0.175391	0.0395395	0.760228	0.0248297	1.16746e-05	35157432
1306	Gpr26.KO250.Ai14_Ctx.L7_m139_1306	Gpr26.KO250.Ai_Ctx.L7	Isocortex.SSp@L7_glu_Gpr26.KO250	Isocortex.SSp@L7_glu_Gpr26.KO250_m141_1306	150116-1	Gpr26.KO250.Ai14	cs.n	Isocortex	glu	SSp@L7	125	141	M	30.48	1	1	truseq	34227978	34179601	95	0.00141338	0.196595	0.0385148	0.740211	0.0246682	1.14103e-05	27686204
1307	Gpr26.KO250.Ai14_Ctx.L7_m140_1307	Gpr26.KO250.Ai_Ctx.L7	Isocortex.SSp@L7_glu_Gpr26.KO250	Isocortex.SSp@L7_glu_Gpr26.KO250_m142_1307	150116-1	Gpr26.KO250.Ai14	cs.n	Isocortex	glu	SSp@L7	101	142	M	27.9	1	1	truseq	34783835	34716148	95	0.00194593	0.224377	0.0401674	0.71019	0.0252543	1.14644e-05	27149875
1308	Gpr26.KO250.Ai14_Ctx.L5_m140_1308	Gpr26.KO250.Ai_Ctx.L5	Isocortex.SSp@L7_glu_Gpr26.KO250	Isocortex.SSp@L7_glu_Gpr26.KO250_m142_1308	150116-1	Gpr26.KO250.Ai14	cs.n	Isocortex	glu	SSp@L7	110	142	M	27.9	1	1	truseq	36417823	36272362	95	0.00399423	0.209139	0.0455953	0.7209	0.0243549	1.0559e-05	28855670
1309	Grp.KH288.Ai14_Th.CL_f126_1309	Grp.KH288.Ai_CL	TH.CL_glu_Grp.KH288	TH.CL_glu_Grp.KH288_f128_1309	150116-1	Grp.KH288.Ai14	cs.n	TH	glu	CL	90	128	F	22.7	1	1	truseq	36913254	36767440	95	0.00395018	0.24439	0.0428767	0.686694	0.0260279	1.22119e-05	28072912
1310	Grp.KH288.Ai14_Th.CL_f126_1310	Grp.KH288.Ai_CL	TH.CL_glu_Grp.KH288	TH.CL_glu_Grp.KH288_f128_1310	150116-1	Grp.KH288.Ai14	cs.n	TH	glu	CL	82	128	F	19.2	1	1	truseq	44402915	44259808	95	0.00322292	0.217951	0.0402323	0.715616	0.0261878	1.27429e-05	35049002
1311	Grp.KH288.Ai14_Th.CL_f129_1311	Grp.KH288.Ai_CL	TH.CL_glu_Grp.KH288	TH.CL_glu_Grp.KH288_f131_1311	150116-1	Grp.KH288.Ai14	cs.n	TH	glu	CL	80	131	F	23.1	1	1	truseq	45449911	45260700	95	0.00416307	0.226089	0.0438529	0.70583	0.0242153	1.30798e-05	35200637
1312	Grp.KH288.Ai14_Hy.DMC_f129_1312	Grp.KH288.Ai_DMHp	HY.DMHp_glu_Grp.KH288	HY.DMHp_glu_Grp.KH288_f131_1312	150116-1	Grp.KH288.Ai14	cs.n	HY	glu	DMHp	25	131	F	23.1	1	1	truseq	47693425	46901876	95	0.0165966	0.121139	0.0487267	0.809746	0.0202517	0.000136839	41579883
1313	P078_Ctx.V1_m40_1313	P078_VISp	Isocortex.VISp_glu_P078	Isocortex.VISp_glu_P078_m40_1313	150116-1	P078	cs.n	Isocortex	glu	VISp	95	40	M		1	1	truseq	50611066	50469018	95	0.00280666	0.190652	0.0500431	0.735249	0.0240429	1.33547e-05	40699710
1314	P078_Ctx.V1_m83_1314	P078_VISp	Isocortex.VISp_glu_P078	Isocortex.VISp_glu_P078_m83_1314	150116-1	P078	cs.n	Isocortex	glu	VISp	76	83	M		1	1	truseq	39933144	39616269	95	0.00793514	0.202498	0.0496457	0.720703	0.027138	1.53725e-05	31859966
1315	P078_Ctx.V1_m83_1315	P078_VISp	Isocortex.VISp_glu_P078	Isocortex.VISp_glu_P078_m83_1315	150116-1	P078	cs.n	Isocortex	glu	VISp	55	83	M		1	1	truseq	42179458	41824052	95	0.00842605	0.179228	0.0468936	0.748639	0.0252263	1.23852e-05	34651977
1316	P078_Ctx.V1_m40_1316	P078_VISp	Isocortex.VISp_glu_P078	Isocortex.VISp_glu_P078_m40_1316	150116-1	P078	cs.n	Isocortex	glu	VISp	54	40	M		1	1	truseq	48069337	47839315	95	0.00478521	0.265784	0.0461691	0.664778	0.0232551	1.42979e-05	35156132
1317	P118_Me.solDL_f72_1317	P118_NTS	MY.NTS_GABA_P118	MY.NTS_GABA_P118_m72_1317	150116-1	P118	cs.n	MY	GABA	NTS	125	72	M		1	1	truseq	45889050	45687998	95	0.00438126	0.206246	0.0455607	0.7249	0.0232805	1.32201e-05	36396477
1319	P118_Me.solDL_m38_1319	P118_NTS	MY.NTS_GABA_P118	MY.NTS_GABA_P118_m38_1319	150116-1	P118	cs.n	MY	GABA	NTS	102	38	M		1	1	truseq	57109498	56782919	95	0.00571847	0.204524	0.0475016	0.72451	0.0234004	6.39277e-05	45255081
1320	P118_Me.solDL_m38_1320	P118_NTS	MY.NTS_GABA_P118	MY.NTS_GABA_P118_m38_1320	150116-1	P118	cs.n	MY	GABA	NTS	101	38	M		1	1	truseq	51373519	51103884	95	0.00524852	0.150946	0.0480536	0.779023	0.0219568	2.02137e-05	43374967
1323	Slc6a5.KF109.Ai9_VPM_m95_1323	Slc6a5.KF109.Ai_VPM	TH.VPM_glu_Slc6a5.KF109	TH.VPM_glu_Slc6a5.KF109_m95_1323	150213-1	Slc6a5.KF109.Ai9	cs.n	TH	glu	VPM	39	95	M	27.2	1	1	truseq	43753783	41044759	100	0.0619152	0.235391	0.0625701	0.683463	0.0171793	0.00139665	32813588
1324	P084_CA1sp_m51_1324	P084_CA1sp	HPF.CA1sp_glu_P084	HPF.CA1sp_glu_P084_f51_1324	150213-1	P084	cs.n	HPF	glu	CA1sp	64	51	F		1	1	truseq	36300517	34143647	100	0.0594171	0.177684	0.0501268	0.746675	0.0241103	0.00140413	29876098
1325	P084_SUBd-sp_f190_1325	P084_SUBd-sp	HPF.SUBd-sp_glu_P084	HPF.SUBd-sp_glu_P084_m190_1325	150213-1	P084	cs.n	HPF	glu	SUBd-sp	52	190	M		1	1	truseq	41565300	39203867	100	0.0568126	0.180835	0.106968	0.68798	0.0228598	0.00135737	31851246
1326	P084_CA1sp_f95_1326	P084_CA1sp	HPF.CA1sp_glu_P084	HPF.CA1sp_glu_P084_f95_1326	150213-1	P084	cs.n	HPF	glu	CA1sp	106	95	F		1	1	truseq	41354828	39889273	100	0.0354385	0.175164	0.0483009	0.749161	0.0260609	0.00131303	34105062
1327	P084_CA1sp_f51_1327	P084_CA1sp	HPF.CA1sp_glu_P084	HPF.CA1sp_glu_P084_f51_1327	150213-1	P084	cs.n	HPF	glu	CA1sp	95	51	F		1	1	truseq	50488966	49343015	100	0.0226971	0.175463	0.0551021	0.742453	0.0243189	0.00266289	40998661
1329	P118_SCm_f72_1329	P118_SCm	MB.SCm_glu_P118	MB.SCm_glu_P118_m72_1329	150213-2	P118	cs.n	MB	glu	SCm	61	72	M		1	1	truseq	38318273	37827028	100	0.0128201	0.187161	0.0540366	0.737513	0.0199984	0.00129066	30602531
1330	P118_SCm_m38_1330	P118_SCm	MB.SCm_glu_P118	MB.SCm_glu_P118_f38_1330	150213-2	P118	cs.n	MB	glu	SCm	57	38	F		1	1	truseq	44441076	43835613	100	0.0136239	0.189234	0.0620277	0.728528	0.0188403	0.00136991	35030863
1331	P118_SCm_m38_1331	P118_SCm	MB.SCm_glu_P118	MB.SCm_glu_P118_m38_1331	150213-2	P118	cs.n	MB	glu	SCm	98	38	M		1	1	truseq	42140331	41891188	100	0.00591222	0.167037	0.0570642	0.754777	0.0198054	0.00131612	34293488
1334	P038_ECT@L6__1334	P038_ECT@L6	Isocortex.ECT@L6_glu_P038	Isocortex.ECT@L6_glu_P038_m35_1334	150213-2	P038	cs.n	Isocortex	glu	ECT@L6	98	35	M		1	1	truseq	46741530	46430540	100	0.0066534	0.21544	0.0391619	0.720525	0.0237712	0.00110221	36779153
1335	P038_ECT@L6__1335	P038_ECT@L6	Isocortex.ECT@L6_glu_P038	Isocortex.ECT@L6_glu_P038_m35_1335	150213-2	P038	cs.n	Isocortex	glu	ECT@L6	76	35	M		1	1	truseq	49243163	48943057	100	0.00609437	0.183406	0.0429326	0.749925	0.0226	0.00113661	40086307
1336	P038_ECT@L6__1336	P038_ECT@L6	Isocortex.ECT@L6_glu_P038	Isocortex.ECT@L6_glu_P038_m35_1336	150213-2	P038	cs.n	Isocortex	glu	ECT@L6	97	35	M		1	1	truseq	50473494	50208911	100	0.00524202	0.190757	0.0420598	0.742409	0.0235911	0.00118288	40746036
1337	P093_PRP__1337	P093_PRP	MY.PRP_glu,GABA_P093	MY.PRP_glu,GABA_P093_m42_1337	150213-3	P093	cs.n	MY	glu,GABA	PRP	152	42	M		1	1	truseq	49342721	49151504	100	0.00387528	0.18303	0.0461634	0.745277	0.0242963	0.00123357	40271731
1338	P093_MV__1338	P093_MV	MY.MV_GABA_P093	MY.MV_GABA_P093_m42_1338	150213-3	P093	cs.n	MY	GABA	MV	115	42	M		1	1	truseq	45000196	44892446	100	0.00239443	0.276464	0.0411572	0.658961	0.022232	0.00118508	32544410
1339	P093_DCO__1339	P093_DCO	MY.DCO_GABA_P093	MY.DCO_GABA_P093_m42_1339	150213-3	P093	cs.n	MY	GABA	DCO	60	42	M		1	1	truseq	44627486	44475941	100	0.00339578	0.250661	0.0396185	0.68539	0.0231149	0.00121639	33385754
1340	P093_MV__1340	P093_MV	MY.MV_GABA_P093	MY.MV_GABA_P093_m42_1340	150213-3	P093	cs.n	MY	GABA	MV	130	42	M		1	1	truseq	41971352	41874560	100	0.00230614	0.241152	0.0388142	0.693953	0.0248685	0.00121286	32051260
1341	P093_PRP__1341	P093_PRP	MY.PRP_glu,GABA_P093	MY.PRP_glu,GABA_P093_f42_1341	150213-3	P093	cs.n	MY	glu,GABA	PRP	60	42	F		1	1	truseq	40888187	40476493	100	0.0100688	0.195281	0.0581601	0.723436	0.021823	0.00129996	32292951
1342	P093_PRP__1342	P093_PRP	MY.PRP_glu,GABA_P093	MY.PRP_glu,GABA_P093_m42_1342	150213-3	P093	cs.n	MY	glu,GABA	PRP	113	42	M		1	1	truseq	45653694	45493399	100	0.00351111	0.134629	0.0473647	0.795159	0.0215105	0.00133756	39175735
1345	P157_ORBm_m37_1345	P157_ORBm	Isocortex.ORBm_glu_P157	Isocortex.ORBm_glu_P157_m37_1345	150213-4	P157	cs.n	Isocortex	glu	ORBm	120	37	M	13.3	1	1	truseq	52354901	52245097	100	0.0020973	0.19158	0.0377699	0.748171	0.0213601	0.00111898	42218405
1346	P157_ORBm_m37_1346	P157_ORBm	Isocortex.ORBm_glu_P157	Isocortex.ORBm_glu_P157_m37_1346	150213-4	P157	cs.n	Isocortex	glu	ORBm	105	37	M	12.1	1	1	truseq	44577614	44449649	100	0.00287061	0.1864	0.0387936	0.752328	0.0213696	0.00110815	36162187
1347	P157_ORBm_m37_1347	P157_ORBm	Isocortex.ORBm_glu_P157	Isocortex.ORBm_glu_P157_m37_1347	150213-4	P157	cs.n	Isocortex	glu	ORBm	95	37	M	14.1	1	1	truseq	43791469	43716145	100	0.00172006	0.201054	0.03671	0.739814	0.0213949	0.00102715	34942221
1348	P157_ORBm_m37_1348	P157_ORBm	Isocortex.ORBm_glu_P157	Isocortex.ORBm_glu_P157_m37_1348	150213-4	P157	cs.n	Isocortex	glu	ORBm	110	37	M	13.7	1	1	truseq	43455724	43371496	100	0.00193825	0.210804	0.0362775	0.730202	0.0216336	0.00108285	34261895
1349	P157_AI_m37_1349	P157_AI	Isocortex.AI_glu_P157	Isocortex.AI_glu_P157_m37_1349	150213-4	P157	cs.n	Isocortex	glu	AI	67	37	M		1	1	truseq	49634584	49451004	100	0.00369863	0.137482	0.0371742	0.8031	0.021148	0.00109646	42735014
1350	P157_AI_m37_1350	P157_AI	Isocortex.AI_glu_P157	Isocortex.AI_glu_P157_m37_1350	150213-4	P157	cs.n	Isocortex	glu	AI	73	37	M		1	1	truseq	53374104	53199510	100	0.00327114	0.160918	0.0391239	0.778684	0.0201631	0.00111057	44545262
1351	Orexin-Cre.Ai14_CEAm_m136_1351	Orexin-Cre.Ai_CEAm	STR.CEAm_GABA_Orexin-Cre	STR.CEAm_GABA_Orexin-Cre_m136_1351	150213-4	Orexin-Cre.Ai14	cs.n	STR	GABA	CEAm	113	136	M	28.6	1	1	truseq	58168808	57949850	100	0.00376418	0.205009	0.0475275	0.725374	0.02092	0.00116927	45652049
1353	TH-GFP_LC_m201_1353	TH-GFP_LC	P.LC_NE_TH-GFP	P.LC_NE_TH-GFP_m201_1353	150213-5	TH-GFP	cs.n	P	NE	LC	100	201	M	30.1	1	1	truseq	39446381	39390370	100	0.00141993	0.363799	0.0325427	0.5791	0.0233991	0.00115866	25437248
1354	TH-GFP_LC_m205_1354	TH-GFP_LC	P.LC_NE_TH-GFP	P.LC_NE_TH-GFP_m205_1354	150213-5	TH-GFP	cs.n	P	NE	LC	104	205	M	29.7	1	1	truseq	42135333	42094091	100	0.000978798	0.353549	0.0344618	0.588509	0.0222703	0.00121034	27449856
1358	Pomc-GFP.P55.fed_ARH_m56_1358	Pomc-GFP.p55.fed_ARH	HY.ARH_glu_Pomc-GFP	HY.ARH_glu_Pomc-GFP_m56_1358	150213-6	Pomc-GFP	cs.n	HY	glu	ARH	72	56	M	19.7	1	1	truseq	46873343	46706125	100	0.00356744	0.239973	0.0416543	0.693556	0.0235361	0.00128077	35665568
1359	NPY-hrGFP.p55.fed_ARH_m55_1359	NPY-hrGFP.p55.fed_ARH	HY.ARH_GABA_NPY-hrGFP	HY.ARH_GABA_NPY-hrGFP_m55_1359	150213-6	NPY-hrGFP	cs.n	HY	GABA	ARH	142	55	M	20.2	1	1	truseq	54035801	53981368	100	0.00100735	0.195906	0.0385134	0.742446	0.0218636	0.0012717	43548770
1362	Pomc-GFP.P55.fed_ARH_m55_1362	Pomc-GFP.p55.fed_ARH	HY.ARH_glu_Pomc-GFP	HY.ARH_glu_Pomc-GFP_m55_1362	150213-6	Pomc-GFP	cs.n	HY	glu	ARH	78	55	M	19.1	1	1	truseq	62885643	62705857	100	0.00285894	0.198399	0.0427235	0.734098	0.0234744	0.00130465	50383197
1363	Pomc-GFP.P55.fed_ARH_m55_1363	Pomc-GFP.p55.fed_ARH	HY.ARH_glu_Pomc-GFP	HY.ARH_glu_Pomc-GFP_m55_1363	150213-7	Pomc-GFP	cs.n	HY	glu	ARH	82	55	M	19.5	1	1	truseq	47648679	47554584	100	0.00197477	0.197862	0.0412799	0.736628	0.0229561	0.00127401	38221747
1365	Pomc-GFP.P55.fed_ARH_f55_1365	Pomc-GFP.p55.fed_ARH	HY.ARH_glu_Pomc-GFP	HY.ARH_glu_Pomc-GFP_f55_1365	150213-7	Pomc-GFP	cs.n	HY	glu	ARH	130	55	F	16.1	1	1	truseq	21409440	21388109	100	0.000996336	0.204929	0.0403773	0.729706	0.0237246	0.0012628	17047260
1377	P162_RSPv_f52_1377	P162_RSPv	Isocortex.RSPv_glu_P162	Isocortex.RSPv_glu_P162_f52_1377	150213-8	P162	cs.n	Isocortex	glu	RSPv	92	52	F	22.9	1	1	truseq	54524987	54291760	100	0.00427743	0.166675	0.0434362	0.76172	0.0270357	0.00113279	45615270
1378	P162_RSPv_f52_1378	P162_RSPv	Isocortex.RSPv_glu_P162	Isocortex.RSPv_glu_P162_f52_1378	150213-8	P162	cs.n	Isocortex	glu	RSPv	102	52	F	17.9	1	1	truseq	52758780	52579521	100	0.00339771	0.108833	0.0410105	0.824121	0.0247993	0.00123615	47131961
1379	Pvalb-Cre.Ai14_@myofiber_f47_1379	Pvalb-Cre.Ai_@myofiber	@myofiber__Pvalb-Cre	@myofiber__Pvalb-Cre_f47_1379	150324-1	Pvalb-Cre.Ai14	cs.o	others		@myofiber	31	47	F		1	1	truseq	34564614	34563403	100	3.50358e-05	0.527829	0.0334107	0.421882	0.01599	0.000887586	16159873
1381	Pvalb-Cre.Ai14_@myofiber_f48_1381	Pvalb-Cre.Ai_@myofiber	@myofiber__Pvalb-Cre	@myofiber__Pvalb-Cre_f48_1381	150324-1	Pvalb-Cre.Ai14	cs.o	others		@myofiber	32	48	F		1	1	truseq	32609489	32607917	100	4.82068e-05	0.629508	0.0305875	0.326288	0.0129152	0.000700443	11822601
1382	PR26_@myofiber_m53_1382	PR26_@myofiber	@myofiber__PR26	@myofiber__PR26_m53_1382	150324-1	PR26	cs.o	others		@myofiber	38	53	M	25	1	1	truseq	32155095	32154202	100	2.77716e-05	0.429328	0.0330826	0.517748	0.0190005	0.000840263	18366659
1383	PR26_@myofiber_m53_1383	PR26_@myofiber	@myofiber__PR26	@myofiber__PR26_m53_1383	150324-1	PR26	cs.o	others		@myofiber	36	53	M	25	1	1	truseq	42162338	42158302	100	9.57252e-05	0.427356	0.0353938	0.518454	0.0179214	0.000875344	24000571
1384	PR26_@myofiber_m53_1384	PR26_@myofiber	@myofiber__PR26	@myofiber__PR26_m53_1384	150324-1	PR26	cs.o	others		@myofiber	30	53	M	22	1	1	truseq	39227347	39219424	100	0.000201976	0.469911	0.0386856	0.473344	0.0171795	0.000880227	20486384
1385	PR26_@myofiber_m53_1385	PR26_@myofiber	@myofiber__PR26	@myofiber__PR26_m53_1385	150324-1	PR26	cs.o	others		@myofiber	30	53	M	22	1	1	truseq	34266668	34263749	100	8.51848e-05	0.497299	0.03433	0.450838	0.0167363	0.000796965	17068020
1386	PR26_@myofiber_f54_1386	PR26_@myofiber	@myofiber__PR26	@myofiber__PR26_f54_1386	150324-1	PR26	cs.o	others		@myofiber	46	54	F	20.6	1	1	truseq	34936910	34934575	100	6.68348e-05	0.498215	0.0330904	0.452098	0.0158365	0.000759763	17346254
1431	AVP.QZ20.Ai14_PVHp_f48_1431	AVP.QZ20.Ai_PVHp	HY.PVHp_glu_AVP.QZ20	HY.PVHp_glu_AVP.QZ20_f48_1431	150331-1	AVP.QZ20.Ai14	cs.n	HY	glu	PVHp	125	48	F	16.4	1	1	truseq	49090049	48835103	100	0.00519343	0.194871	0.0531594	0.72453	0.0262585	0.00118163	39289456
1432	AVP.QZ20.Ai14_PVHp_f48_1432	AVP.QZ20.Ai_PVHp	HY.PVHp_glu_AVP.QZ20	HY.PVHp_glu_AVP.QZ20_f48_1432	150331-1	AVP.QZ20.Ai14	cs.n	HY	glu	PVHp	122	48	F	18.3	1	1	truseq	41856880	41595186	100	0.00625211	0.168133	0.0574723	0.747595	0.0255342	0.00126604	34414706
1433	AVP.QZ20.Ai14_SO_f103_1433	AVP.QZ20.Ai_SO	HY.SO_glu_AVP.QZ20	HY.SO_glu_AVP.QZ20_f103_1433	150331-1	AVP.QZ20.Ai14	cs.n	HY	glu	SO	126	103	F	20.5	1	1	truseq	44859787	44617600	100	0.00539875	0.225023	0.0559267	0.688128	0.029757	0.0011651	34723277
1434	AVP.QZ20.Ai14_SO_m103_1434	AVP.QZ20.Ai_SO	HY.SO_glu_AVP.QZ20	HY.SO_glu_AVP.QZ20_m103_1434	150331-1	AVP.QZ20.Ai14	cs.n	HY	glu	SO	122	103	M	26.2	1	1	truseq	35224312	35095974	100	0.00364345	0.204312	0.0554183	0.708815	0.0302514	0.00120333	27998672
1435	AVP.QZ20.Ai14_SO_m109_1435	AVP.QZ20.Ai_SO	HY.SO_glu_AVP.QZ20	HY.SO_glu_AVP.QZ20_m109_1435	150331-1	AVP.QZ20.Ai14	cs.n	HY	glu	SO	110	109	M	27.7	1	1	truseq	33146153	32975477	100	0.00514919	0.190975	0.0599278	0.71686	0.0310196	0.00121751	26693987
1436	AVP.QZ20.Ai14_SO_m109_1436	AVP.QZ20.Ai_SO	HY.SO_glu_AVP.QZ20	HY.SO_glu_AVP.QZ20_m109_1436	150331-1	AVP.QZ20.Ai14	cs.n	HY	glu	SO	138	109	M	29.1	1	1	truseq	31070319	30954659	100	0.00372252	0.20014	0.0546423	0.714753	0.029301	0.00116451	24808079
1437	AVP.QZ20.Ai14_sup_m110_1437	AVP.QZ20.Ai_sup	HY.SO_glu_AVP.QZ20	HY.SO_glu_AVP.QZ20_m110_1437	150331-1	AVP.QZ20.Ai14	cs.n	HY	glu	SO	148	110	M	31.9	1	1	truseq	42065246	41968225	100	0.00230644	0.169824	0.0520787	0.748703	0.0282724	0.00112247	34889668
1438	AVP.QZ20.Ai14_sup_m31_1438	AVP.QZ20.Ai_sup	HY.SO_glu_AVP.QZ20	HY.SO_glu_AVP.QZ20_m31_1438	150331-1	AVP.QZ20.Ai14	cs.n	HY	glu	SO	120	31	M	15.9	1	1	truseq	35294139	34432406	100	0.0244158	0.371779	0.101964	0.49155	0.0324617	0.00224512	21091671
1440	P170_@pancreas_f38_1440	P170_@pancreas	@pancreas__P170	@pancreas__P170_f38_1440	150331-2	P170	cs.o	others		@pancreas	92	38	F	14.5	1	1	truseq	46542027	46394945	100	0.0031602	0.193501	0.0491848	0.485027	0.271417	0.000870353	73592973
1441	P170_@pancreas_m39_1441	P170_@pancreas	@pancreas__P170	@pancreas__P170_m39_1441	150331-2	P170	cs.o	others		@pancreas	86	39	M	19.4	1	1	truseq	40018787	39831970	100	0.00466823	0.389383	0.0498944	0.426778	0.133175	0.000769834	38913628
1442	P170_@pancreas_m39_1442	P170_@pancreas	@pancreas__P170	@pancreas__P170_m39_1442	150331-2	P170	cs.o	others		@pancreas	53	39	M	17.4	1	1	truseq	37626740	37455404	100	0.00455357	0.355418	0.0443923	0.466504	0.132949	0.000735568	38064956
1443	56L_@BAT_f137_1443	56L_@BAT	@BAT__56L	@BAT__56L_f147_1443	150331-2	56L	cs.o	others		@BAT	61	147	F	27.9	1	1	truseq	39608746	38890058	100	0.0181447	0.651271	0.0631329	0.26694	0.0177201	0.000935612	13047776
1444	56L_@BAT_f105_1444	56L_@BAT	@BAT__56L	@BAT__56L_f105_1444	150331-2	56L	cs.o	others		@BAT	101	105	F	22	1	1	truseq	45023718	44813280	100	0.00467394	0.674181	0.0483647	0.258327	0.0183179	0.000809938	14017881
1445	56L_@BAT_f107_1445	56L_@BAT	@BAT__56L	@BAT__56L_f107_1445	150331-2	56L	cs.o	others		@BAT	84	107	F	19.9	1	1	truseq	40773416	40004015	100	0.0188702	0.575026	0.0781981	0.321122	0.0244031	0.0012512	16362718
1446	56L_@BAT_f107_1446	56L_@BAT	@BAT__56L	@BAT__56L_f107_1446	150331-2	56L	cs.o	others		@BAT	102	107	F	24	1	1	truseq	46416941	45796959	100	0.0133568	0.606222	0.0629572	0.307055	0.0229084	0.000857786	17628655
1505	bb_wc__1505	BB_WC	Isocortex_glu,GABA_bb	Isocortex_glu,GABA_bb_mf_1505	bb-8	bb	ti.b	Isocortex	glu,GABA	Isocortex			MF				truseq	33681654	33681654	101	0	0.109307	0.0237106	0.826599	0.0403835	0.00395893	31863288
1506	bb_wc__1506	BB_WC	Isocortex_glu_bb	Isocortex_glu_bb_mf_1506	bb-8	bb	ti.b	Isocortex	glu	Isocortex			MF				truseq	34281890	34281890	101	0	0.124902	0.0224106	0.81341	0.0392772	0.00146274	31870736
1507	bb_wc__1507	BB_WC	Isocortex_glu_bb	Isocortex_glu_bb_mf_1507	bb-8	bb	ti.b	Isocortex	glu	Isocortex			MF				truseq	33305359	33305359	101	0	0.0992441	0.0234109	0.837306	0.0400393	0.00173563	31823021
1509	sanger_liver__1509	SANGER_@Liver	@Liver__sanger	@Liver__sanger_mf_1509	sanger	sanger	ti.o	others		@Liver			MF				truseq	29959017	29959017	76	0	0.133076	0.09237	0.706069	0.0679771	0.00050746	28107621
1510	sanger_liver__1510	SANGER_@Liver	@Liver__sanger	@Liver__sanger_mf_1510	sanger	sanger	ti.o	others		@Liver			MF				truseq	29301937	29301937	76	0	0.129933	0.0528384	0.752898	0.063887	0.000443998	28293518
1511	sanger_liver__1511	SANGER_@Liver	@Liver__sanger	@Liver__sanger_mf_1511	sanger	sanger	ti.o	others		@Liver			MF				truseq	30796033	30796033	76	0	0.139886	0.0413002	0.759537	0.0588145	0.00046217	29445683
1512	sanger_liver__1512	SANGER_@Liver	@Liver__sanger	@Liver__sanger_mf_1512	sanger	sanger	ti.o	others		@Liver			MF				truseq	31321240	31321240	76	0	0.127871	0.0438642	0.76243	0.0653884	0.000446342	30849467
1513	sanger_liver__1513	SANGER_@Liver	@Liver__sanger	@Liver__sanger_mf_1513	sanger	sanger	ti.o	others		@Liver			MF				truseq	31389637	31389637	76	0	0.128871	0.0454642	0.76068	0.0644885	0.000496916	30753378
1515	sanger_spleen__1515	SANGER_@Spleen	@Spleen__sanger	@Spleen__sanger_mf_1515	sanger	sanger	ti.o	others		@Spleen			MF				truseq	25187785	25187785	76	0	0.0897441	0.0809811	0.737777	0.0909217	0.000576232	25279186
1516	sanger_spleen__1516	SANGER_@Spleen	@Spleen__sanger	@Spleen__sanger_mf_1516	sanger	sanger	ti.o	others		@Spleen			MF				truseq	24212578	24212578	76	0	0.0590707	0.0611025	0.777629	0.101591	0.000606503	25838543
1518	sanger_spleen__1518	SANGER_@Spleen	@Spleen__sanger	@Spleen__sanger_mf_1518	sanger	sanger	ti.o	others		@Spleen			MF				truseq	31891713	31891713	76	0	0.108174	0.0620577	0.755394	0.0737138	0.000659921	31290101
1519	sanger_spleen__1519	SANGER_@Spleen	@Spleen__sanger	@Spleen__sanger_mf_1519	sanger	sanger	ti.o	others		@Spleen			MF				truseq	25619218	25619218	76	0	0.0803173	0.0407784	0.784513	0.0937228	0.000668522	26711370
1520	sanger_thymus__1520	SANGER_@Thymus	@Thymus__sanger	@Thymus__sanger_mf_1520	sanger	sanger	ti.o	others		@Thymus			MF				truseq	33088629	33088629	76	0	0.105498	0.035606	0.79121	0.0670904	0.000596096	33002037
1521	sanger_thymus__1521	SANGER_@Thymus	@Thymus__sanger	@Thymus__sanger_mf_1521	sanger	sanger	ti.o	others		@Thymus			MF				truseq	34181929	34181929	76	0	0.0720699	0.0401568	0.820058	0.0670811	0.000634604	35175879
1522	sanger_thymus__1522	SANGER_@Thymus	@Thymus__sanger	@Thymus__sanger_mf_1522	sanger	sanger	ti.o	others		@Thymus			MF				truseq	34440865	34440865	76	0	0.0965342	0.0405132	0.798538	0.0637869	0.000627365	34259042
1523	sanger_thymus__1523	SANGER_@Thymus	@Thymus__sanger	@Thymus__sanger_mf_1523	sanger	sanger	ti.o	others		@Thymus			MF				truseq	35640217	35640217	76	0	0.0613729	0.0420643	0.825558	0.070355	0.00064994	37184772
1524	sanger_thymus__1524	SANGER_@Thymus	@Thymus__sanger	@Thymus__sanger_mf_1524	sanger	sanger	ti.o	others		@Thymus			MF				truseq	34916651	34916651	76	0	0.0760551	0.0431714	0.809648	0.0704779	0.000647427	36062041
1525	sanger_thymus__1525	SANGER_@Thymus	@Thymus__sanger	@Thymus__sanger_mf_1525	sanger	sanger	ti.o	others		@Thymus			MF				truseq	35768263	35768263	76	0	0.0717653	0.0368835	0.826852	0.0638552	0.000644286	36587268
1526	sanger_lung__1526	SANGER_@Lung	@Lung__sanger	@Lung__sanger_mf_1526	sanger	sanger	ti.o	others		@Lung			MF				truseq	11743827	11743827	76	0	0.168834	0.0446188	0.740866	0.0449304	0.000750863	10269342
1527	sanger_lung__1527	SANGER_@Lung	@Lung__sanger	@Lung__sanger_mf_1527	sanger	sanger	ti.o	others		@Lung			MF				truseq	25820157	25820157	76	0	0.0515781	0.0518916	0.847421	0.0484594	0.000649841	25559242
1528	sanger_lung__1528	SANGER_@Lung	@Lung__sanger	@Lung__sanger_mf_1528	sanger	sanger	ti.o	others		@Lung			MF				truseq	23277170	23277170	76	0	0.0461068	0.0603143	0.84183	0.0511041	0.00064501	23099363
1529	sanger_lung__1529	SANGER_@Lung	@Lung__sanger	@Lung__sanger_mf_1529	sanger	sanger	ti.o	others		@Lung			MF				truseq	12068237	12068237	76	0	0.0384987	0.021791	0.886505	0.0524907	0.000714355	12551627
1530	sanger_lung__1530	SANGER_@Lung	@Lung__sanger	@Lung__sanger_mf_1530	sanger	sanger	ti.o	others		@Lung			MF				truseq	28418262	28418262	76	0	0.0498386	0.0473446	0.854352	0.0478158	0.000648738	28377949
1531	sanger_lung__1531	SANGER_@Lung	@Lung__sanger	@Lung__sanger_mf_1531	sanger	sanger	ti.o	others		@Lung			MF				truseq	18326187	18326187	76	0	0.0624342	0.0277677	0.858864	0.0502631	0.000671389	18463834
1532	sanger_heart__1532	SANGER_@Heart	@Heart__sanger	@Heart__sanger_mf_1532	sanger	sanger	ti.o	others		@Heart			MF				truseq	31000737	31000737	76	0	0.313133	0.0345795	0.612553	0.0392376	0.000497246	22405545
1534	sanger_heart__1534	SANGER_@Heart	@Heart__sanger	@Heart__sanger_mf_1534	sanger	sanger	ti.o	others		@Heart			MF				truseq	30075234	30075234	76	0	0.308804	0.0331334	0.618604	0.0389505	0.000508624	21888368
1535	sanger_heart__1535	SANGER_@Heart	@Heart__sanger	@Heart__sanger_mf_1535	sanger	sanger	ti.o	others		@Heart			MF				truseq	27824366	27824366	76	0	0.34513	0.035046	0.582932	0.0364015	0.000490433	19071642
1536	sanger_heart__1536	SANGER_@Heart	@Heart__sanger	@Heart__sanger_mf_1536	sanger	sanger	ti.o	others		@Heart			MF				truseq	31160789	31160789	76	0	0.290268	0.0497453	0.618153	0.0412944	0.000538658	22865184
1537	sanger_hippocampus__1537	SANGER_HPF	HPF_glu,GABA_sanger	HPF_glu,GABA_sanger_mf_1537	sanger	sanger	ti.b	HPF	glu,GABA	HPF			MF				truseq	18754013	18754013	76	0	0.0564395	0.0187971	0.886014	0.0380663	0.000682787	18636156
1538	sanger_hippocampus__1538	SANGER_HPF	HPF_glu,GABA_sanger	HPF_glu,GABA_sanger_mf_1538	sanger	sanger	ti.b	HPF	glu,GABA	HPF			MF				truseq	33600444	33600444	76	0	0.0846898	0.0223269	0.85428	0.0380059	0.000697282	32319098
1539	sanger_hippocampus__1539	SANGER_HPF	HPF_glu,GABA_sanger	HPF_glu,GABA_sanger_mf_1539	sanger	sanger	ti.b	HPF	glu,GABA	HPF			MF				truseq	23813505	23813505	76	0	0.0490774	0.0205184	0.891967	0.0378223	0.000615407	23806226
1540	sanger_hippocampus__1540	SANGER_HPF	HPF_glu,GABA_sanger	HPF_glu,GABA_sanger_mf_1540	sanger	sanger	ti.b	HPF	glu,GABA	HPF			MF				truseq	23239807	23239807	76	0	0.0791973	0.0197207	0.862783	0.0376192	0.000679179	22525236
1541	sanger_hippocampus__1541	SANGER_HPF	HPF_glu,GABA_sanger	HPF_glu,GABA_sanger_mf_1541	sanger	sanger	ti.b	HPF	glu,GABA	HPF			MF				truseq	22618452	22618452	76	0	0.0607251	0.0200158	0.880389	0.0382027	0.00066711	22354405
1542	sanger_hippocampus__1542	SANGER_HPF	HPF_glu,GABA_sanger	HPF_glu,GABA_sanger_mf_1542	sanger	sanger	ti.b	HPF	glu,GABA	HPF			MF				truseq	32670655	32670655	76	0	0.0850065	0.0218306	0.854132	0.0383128	0.000717555	31416449
1543	sanger_heart__1543	SANGER_@Heart	@Heart__sanger	@Heart__sanger_mf_1543	sanger	sanger	ti.o	others		@Heart			MF				truseq	29498377	29498377	76	0	0.412555	0.0175673	0.536147	0.0333137	0.00041704	18497022
1580	Fev_DR_m23_1580	Fev_DR	MB.DR_5HT_Fev	MB.DR_5HT_Fev_m23_1580	150402-1	Fev	cs.n	MB	5HT	DR	128	23	M	8.9	1	1	truseq	36998933	36551831	100	0.0120842	0.467103	0.0449005	0.461396	0.0251288	0.00147125	19863782
1581	Fev_CSm_m23_1581	Fev_CSm	P.CSm_5HT_Fev	P.CSm_5HT_Fev_m23_1581	150402-1	Fev	cs.n	P	5HT	CSm	138	23	M	8.9	1	1	truseq	35323705	34932589	100	0.0110723	0.371699	0.0444912	0.558244	0.0233906	0.00217465	22205096
1582	Fev_RPA_m23_1582	Fev_RPA	MY.RPA_GABA,5HT_Fev	MY.RPA_GABA,5HT_Fev_m23_1582	150402-1	Fev	cs.n	MY	GABA,5HT	RPA	53	23	M	8.9	1	1	truseq	42228446	40600981	100	0.0385395	0.438167	0.0554544	0.481209	0.0230874	0.00208231	23838651
1583	Fev_DR_m45_1583	Fev_DR	MB.DR_5HT_Fev	MB.DR_5HT_Fev_m45_1583	150402-1	Fev	cs.n	MB	5HT	DR	125	45	M	21.4	1	1	truseq	40035319	39224569	100	0.0202509	0.496289	0.0462792	0.433245	0.0227047	0.00148211	20305352
1584	Fev_CSm_m45_1584	Fev_CSm	P.CSm_5HT_Fev	P.CSm_5HT_Fev_m45_1584	150402-1	Fev	cs.n	P	5HT	CSm	102	45	M	21.4	1	1	truseq	38064066	36969882	100	0.0287459	0.45423	0.0495741	0.469333	0.0252928	0.00156998	21077442
1585	AVP.QZ20.Ai14_SCH_f39_1585	AVP.QZ20.Ai_SCH	HY.SCH_GABA_AVP.QZ20	HY.SCH_GABA_AVP.QZ20_f39_1585	150402-1	AVP.QZ20	cs.n	HY	GABA	SCH	135	39	F	16	1	1	truseq	34283454	31419983	100	0.0835234	0.244468	0.0557997	0.674907	0.0226454	0.00217973	26139544
1587	ChAT_DMX_f107_1587	ChAT_DMX	MY.DMX_ACh_ChAT	MY.DMX_ACh_ChAT_f107_1587	150408-1	ChAT	cs.n	MY	ACh	DMX	85	107	F	21.8	1	1	truseq	44986261	44844876	100	0.00314285	0.305092	0.0473575	0.614903	0.0312648	0.00138297	31736421
1588	ChAT_PBl_f107_1588	ChAT_PBl	P.PBl_glu_ChAT	P.PBl_glu_ChAT_f107_1588	150408-1	ChAT	cs.n	P	glu	PBl	115	107	F	21.8	1	1	truseq	35254397	35068383	100	0.00527634	0.219114	0.046143	0.706588	0.0267987	0.00135609	27661891
1589	ChAT_VII_f109_1589	ChAT_VII	MY.VII_ACh_ChAT	MY.VII_ACh_ChAT_f109_1589	150408-1	ChAT	cs.n	MY	ACh	VII	63	109	F	20.1	1	1	truseq	32675993	32315621	100	0.0110286	0.221688	0.100117	0.633457	0.0426031	0.00213466	24775346
1590	ChAT_DMX_f109_1590	ChAT_DMX	MY.DMX_ACh_ChAT	MY.DMX_ACh_ChAT_f109_1590	150408-1	ChAT	cs.n	MY	ACh	DMX	117	109	F	20.1	1	1	truseq	37266055	36982997	100	0.0075956	0.301023	0.0585352	0.604138	0.034856	0.00144812	26363971
1591	ChAT_PBl_f109_1591	ChAT_PBl	P.PBl_glu_ChAT	P.PBl_glu_ChAT_f109_1591	150408-1	ChAT	cs.n	P	glu	PBl	64	109	F	20.1	1	1	truseq	44575533	44112816	100	0.0103805	0.221127	0.0548698	0.692549	0.0296278	0.00182731	34800729
1592	ChAT_VII_f85_1592	ChAT_VII	MY.VII_ACh_ChAT	MY.VII_ACh_ChAT_f85_1592	150408-1	ChAT	cs.n	MY	ACh	VII	58	85	F	17.8	1	1	truseq	34046687	33904748	100	0.00416895	0.292359	0.0511412	0.624633	0.029984	0.00188342	24173002
1593	ChAT_DMX_f85_1593	ChAT_DMX	MY.DMX_ACh_ChAT	MY.DMX_ACh_ChAT_f85_1593	150408-1	ChAT	cs.n	MY	ACh	DMX	127	85	F	17.8	1	1	truseq	45341663	45219874	100	0.00268603	0.265961	0.0469338	0.653585	0.032274	0.00124611	33855323
1594	ChAT_PBl_f85_1594	ChAT_PBl	P.PBl_glu_ChAT	P.PBl_glu_ChAT_f85_1594	150408-1	ChAT	cs.n	P	glu	PBl	104	85	F	17.8	1	1	truseq	37522116	37231329	100	0.00774975	0.215648	0.0534976	0.699091	0.0303079	0.0014549	29579475
1595	ChAT_VII_f107_1595	ChAT_VII	MY.VII_ACh_ChAT	MY.VII_ACh_ChAT_f107_1595	150413-1	ChAT	cs.n	MY	ACh	VII	32	107	F	21.8	1	1	truseq	42056452	41548329	100	0.0120819	0.221402	0.0666892	0.676122	0.0340069	0.00177969	32611700
1596	MCH_PVHd_m116_1596	MCH_PVHd	HY.PVHd_glu_MCH	HY.PVHd_glu_MCH_m116_1596	150413-1	MCH	cs.n	HY	glu	PVHd	36	116	M	26	1	1	truseq	41299816	40555308	100	0.0180269	0.258852	0.0628521	0.64753	0.0292054	0.00155972	30411056
1597	MCH_LHA_m116_1597	MCH_LHA	HY.LHA_glu_MCH	HY.LHA_glu_MCH_m116_1597	150413-1	MCH	cs.n	HY	glu	LHA	42	116	M	25.6	1	1	truseq	33116035	31859350	100	0.0379479	0.294992	0.0874931	0.581437	0.0327381	0.00333955	22874341
1598	MCH_LHA_m116_1598	MCH_LHA	HY.LHA_glu_MCH	HY.LHA_glu_MCH_m116_1598	150413-1	MCH	cs.n	HY	glu	LHA	39	116	M	25.6	1	1	truseq	28412664	28096714	100	0.01112	0.204129	0.054104	0.709343	0.0307421	0.00168251	22703380
1599	MCH_PVHd_m109_1599	MCH_PVHd	HY.PVHd_glu_MCH	HY.PVHd_glu_MCH_m109_1599	150413-1	MCH	cs.n	HY	glu	PVHd	41	109	M	28.3	1	1	truseq	41883719	40834275	100	0.0250561	0.264298	0.055241	0.652035	0.0264414	0.00198485	30751063
1600	MCH_LHA_m109_1600	MCH_LHA	HY.LHA_glu_MCH	HY.LHA_glu_MCH_m109_1600	150413-1	MCH	cs.n	HY	glu	LHA	48	109	M	28.3	1	1	truseq	39500948	38520926	100	0.0248101	0.258468	0.0578487	0.65497	0.0262155	0.00249828	29130051
1601	MCH_PVHd_m109_1601	MCH_PVHd	HY.PVHd_glu_MCH	HY.PVHd_glu_MCH_m109_1601	150413-1	MCH	cs.n	HY	glu	PVHd	78	109	M	26.5	1	1	truseq	42864103	42726446	100	0.00321148	0.233943	0.0460074	0.68998	0.0289186	0.0011506	33106961
1602	MCH_LHA_m109_1602	MCH_LHA	HY.LHA_glu_MCH	HY.LHA_glu_MCH_m109_1602	150413-1	MCH	cs.n	HY	glu	LHA	82	109	M	26.5	1	1	truseq	40798135	40645106	100	0.00375088	0.248187	0.0457644	0.675545	0.0286613	0.00184266	30915273
1611	P084_SSp@L5_f23_1611	P084_SSp@L5	Isocortex.SSp@L5_glu_P084	Isocortex.SSp@L5_glu_P084_f23_1611	150423-1	P084	cs.n	Isocortex	glu	SSp@L5	87	23	F	8.2	1	1	truseq	42061859	41839183	100	0.00529401	0.277479	0.0497515	0.642614	0.0285645	0.00159088	30400645
1612	P084_SSp@L5_m23_1612	P084_SSp@L5	Isocortex.SSp@L5_glu_P084	Isocortex.SSp@L5_glu_P084_m23_1612	150423-1	P084	cs.n	Isocortex	glu	SSp@L5	95	23	M	8.7	1	1	truseq	40450142	40185550	100	0.00654119	0.288565	0.0534897	0.628154	0.0282197	0.00157141	28652872
1613	P084_SSp@L5_m23_1613	P084_SSp@L5	Isocortex.SSp@L5_glu_P084	Isocortex.SSp@L5_glu_P084_m23_1613	150423-1	P084	cs.n	Isocortex	glu	SSp@L5	115	23	M	7.1	1	1	truseq	39350337	38954196	100	0.010067	0.322441	0.0516474	0.596922	0.0275799	0.00140984	26621225
1614	P084_SUBd-sp_m23_1614	P084_SUBd-sp	HPF.SUBd-sp_glu_P084	HPF.SUBd-sp_glu_P084_m23_1614	150423-1	P084	cs.n	HPF	glu	SUBd-sp	114	23	M	8.7	1	1	truseq	35424710	35257558	100	0.00471851	0.236443	0.0635989	0.671212	0.0272257	0.00152038	26529762
1615	P084_AMd_m23_1615	P084_AMd	TH.AMd_glu_P084	TH.AMd_glu_P084_m23_1615	150423-1	P084	cs.n	TH	glu	AMd	89	23	M	7.1	1	1	truseq	35114458	34974653	100	0.00398141	0.204863	0.048933	0.722928	0.0218055	0.00147041	27614560
1616	Gpr26.KO273.Ai14_IO_m36_1616	Gpr26.KO250.Ai_IO	MY.IO_glu_Gpr26.KO273	MY.IO_glu_Gpr26.KO273_m36_1616	150423-1	Gpr26.KO273.Ai14	cs.n	MY	glu	IO	101	36	M	18.8	1	1	truseq	32521702	32370691	100	0.00464339	0.219052	0.048752	0.706352	0.0243933	0.00145042	25294941
1617	Gpr26.KO273.Ai14_IO_f33_1617	Gpr26.KO250.Ai_IO	MY.IO_glu_Gpr26.KO273	MY.IO_glu_Gpr26.KO273_f33_1617	150423-1	Gpr26.KO273.Ai14	cs.n	MY	glu	IO	121	33	F	16.1	1	1	truseq	37602163	37463258	100	0.00369407	0.261114	0.0459796	0.664478	0.0269727	0.00145513	27883942
1618	Gpr26.KO273.AI14_IO_m34_1618	Gpr26.KO250.Ai_IO	MY.IO_glu_Gpr26.KO273	MY.IO_glu_Gpr26.KO273_m34_1618	150423-1	Gpr26.KO273.Ai14	cs.n	MY	glu	IO	45	34	M	20.9	1	1	truseq	32428332	31971559	100	0.0140856	0.214603	0.0592376	0.696104	0.0284785	0.00157671	25295558
1619	Slc6a5.KF109.Ai9_DCO_m86_1619	Slc6a5.KF109.Ai_DCO	MY.DCO_GABA_Slc6a5.KF109	MY.DCO_GABA_Slc6a5.KF109_m86_1619	150423-2	Slc6a5.KF109.Ai9	cs.n	MY	GABA	DCO	41	86	M	27.5	1	1	truseq	38030141	37340121	100	0.018144	0.236201	0.063762	0.670492	0.0264364	0.00310851	28555029
1620	Slc6a5.KF109.Ai9_DCO_m86_1620	Slc6a5.KF109.Ai_DCO	MY.DCO_GABA_Slc6a5.KF109	MY.DCO_GABA_Slc6a5.KF109_m86_1620	150423-2	Slc6a5.KF109.Ai9	cs.n	MY	GABA	DCO	53	86	M	30.5	1	1	truseq	38981603	38462201	100	0.0133243	0.273206	0.0543296	0.644598	0.0259835	0.00188291	28127416
1621	Slc6a5.KF109.Ai9_DCO_m86_1621	Slc6a5.KF109.Ai_DCO	MY.DCO_GABA_Slc6a5.KF109	MY.DCO_GABA_Slc6a5.KF109_m86_1621	150423-2	Slc6a5.KF109.Ai9	cs.n	MY	GABA	DCO	102	86	M	28.6	1	1	truseq	44302614	44011521	100	0.00657056	0.264376	0.0488441	0.657633	0.0279134	0.00123384	32549656
1622	Slc6a5.KF109.Ai9_DCO_m86_1622	Slc6a5.KF109.Ai_DCO	MY.DCO_GABA_Slc6a5.KF109	MY.DCO_GABA_Slc6a5.KF109_m86_1622	150423-2	Slc6a5.KF109.Ai9	cs.n	MY	GABA	DCO	105	86	M	28.6	1	1	truseq	36016737	35871705	100	0.00402679	0.257165	0.0448123	0.668132	0.0282459	0.001645	26840337
1623	Fev_DR_m70_1623	Fev_DR	MB.DR_5HT_Fev	MB.DR_5HT_Fev_f70_1623	150423-2	Fev	cs.n	MB	5HT	DR	125	70	F	19.7	1	1	truseq	34007311	33927335	100	0.00235173	0.296462	0.0479285	0.621628	0.0328404	0.00114141	24313418
1624	Fev_CSm_m70_1624	Fev_CSm	P.CSm_5HT_Fev	P.CSm_5HT_Fev_f70_1624	150423-2	Fev	cs.n	P	5HT	CSm	108	70	F	19.7	1	1	truseq	37034676	36975145	100	0.00160744	0.310302	0.0452047	0.613124	0.0299869	0.00138304	25857770
1625	Fev_DR_m71_1625	Fev_DR	MB.DR_5HT_Fev	MB.DR_5HT_Fev_f71_1625	150423-2	Fev	cs.n	MB	5HT	DR	152	71	F	20.9	1	1	truseq	36921611	36876234	100	0.00122901	0.29632	0.0468974	0.624585	0.030642	0.00155482	26260366
1626	Fev_CSm_m71_1626	Fev_CSm	P.CSm_5HT_Fev	P.CSm_5HT_Fev_f71_1626	150423-2	Fev	cs.n	P	5HT	CSm	110	71	F	20.9	1	1	truseq	34942177	34861923	100	0.00229677	0.263323	0.0462091	0.658333	0.0310408	0.00109415	26083777
1643	P162_SUBd-sp_m51_1643	P162_SUBd-sp	HPF.SUBd-sp_glu_P162	HPF.SUBd-sp_glu_P162_m51_1643	150430-1	P162	cs.n	HPF	glu	SUBd-sp	153	51	M	22.9	1	1	truseq	40647439	40502487	105	0.00356608	0.182831	0.0578746	0.733789	0.0241083	0.00139774	32578119
1644	Fev_RPA_f61_1644	Fev_RPA	MY.RPA_GABA,5HT_Fev	MY.RPA_GABA,5HT_Fev_f61_1644	150430-1	Fev	cs.n	MY	GABA,5HT	RPA	86	61	F	19.3	1	1	truseq	44152205	44034823	105	0.00265858	0.283848	0.0593875	0.632001	0.0234253	0.00133742	30895984
1645	Fev_RPA_f61_1645	Fev_RPA	MY.RPA_GABA,5HT_Fev	MY.RPA_GABA,5HT_Fev_f61_1645	150430-1	Fev	cs.n	MY	GABA,5HT	RPA	101	61	F	18.6	1	1	truseq	37224961	37155335	105	0.00187041	0.303568	0.0525338	0.618649	0.0240509	0.00119867	25599944
1646	Fev_RPA_f62_1646	Fev_RPA	MY.RPA_GABA,5HT_Fev	MY.RPA_GABA,5HT_Fev_f62_1646	150430-1	Fev	cs.n	MY	GABA,5HT	RPA	108	62	F	19.4	1	1	truseq	38968909	38901555	105	0.0017284	0.243129	0.0590203	0.669019	0.0275375	0.0012947	29059766
1663	P162_SSp_m37_1663	P162_SSp@L6	Isocortex.SSp@L6_glu_P162	Isocortex.SSp@L6_glu_P162_m37_1663	150501-1	P162	cs.n	Isocortex	glu	SSp@L6	115	37	M	19.7	1	1	truseq	46389930	46152291	105	0.00512264	0.288533	0.0450557	0.64124	0.0234306	0.00174072	32815433
1664	P162_SSp_m37_1664	P162_SSp@L6	Isocortex.SSp@L6_glu_P162	Isocortex.SSp@L6_glu_P162_m37_1664	150501-1	P162	cs.n	Isocortex	glu	SSp@L6	90	37	M	19.1	1	1	truseq	26724692	26519089	105	0.00769337	0.274875	0.0536013	0.647064	0.0229631	0.0014967	19041999
1665	P162_SSp_f41_1665	P162_SSp@L6	Isocortex.SSp@L6_glu_P162	Isocortex.SSp@L6_glu_P162_f41_1665	150501-1	P162	cs.n	Isocortex	glu	SSp@L6	101	41	F	17.4	1	1	truseq	33594612	33367769	105	0.00675236	0.254383	0.0514349	0.670246	0.0221433	0.00179281	24621999
1666	P162_SSp_f41_1666	P162_SSp@L6	Isocortex.SSp@L6_glu_P162	Isocortex.SSp@L6_glu_P162_f41_1666	150501-1	P162	cs.n	Isocortex	glu	SSp@L6	85	41	F	15.3	1	1	truseq	30433059	30170068	105	0.00864162	0.211138	0.0559754	0.708672	0.0221135	0.00210076	23485048
1667	56L_SSp_m90_1667	56L_SSp@L6	Isocortex.SSp@L6_glu_56L	Isocortex.SSp@L6_glu_56L_m90_1667	150501-1	56L	cs.n	Isocortex	glu	SSp@L6	152	90	M	30.2	1	1	truseq	35755500	35618532	105	0.00383068	0.270723	0.0557445	0.650427	0.0212284	0.0018761	25399369
1668	56L_SSp_m90_1668	56L_SSp@L6	Isocortex.SSp@L6_glu_56L	Isocortex.SSp@L6_glu_56L_m90_1668	150501-1	56L	cs.n	Isocortex	glu	SSp@L6	145	90	M	26.8	1	1	truseq	37937974	37771215	105	0.00439557	0.232945	0.063765	0.679403	0.0221427	0.00174411	28123917
1669	56L_SSp_m96_1669	56L_SSp@L6	Isocortex.SSp@L6_glu_56L	Isocortex.SSp@L6_glu_56L_m96_1669	150501-1	56L	cs.n	Isocortex	glu	SSp@L6	141	96	M	28.5	1	1	truseq	38889586	38750909	105	0.00356592	0.261309	0.0519575	0.664186	0.0211679	0.00137922	28137271
1670	56L_SSp_m96_1670	56L_SSp@L6	Isocortex.SSp@L6_glu_56L	Isocortex.SSp@L6_glu_56L_m96_1670	150501-1	56L	cs.n	Isocortex	glu	SSp@L6	152	96	M	28.9	1	1	truseq	29424945	29347600	105	0.00262855	0.26469	0.0599344	0.652131	0.0215897	0.00165482	20951599
1671	56L_VISp_m86_1671	56L_VISp@L6	Isocortex.VISp@L6_glu_56L	Isocortex.VISp@L6_glu_56L_m86_1671	150501-2	56L	cs.n	Isocortex	glu	VISp@L6	145	86	M	31.6	1	1	truseq	40119483	39856666	105	0.00655086	0.252362	0.0525442	0.672158	0.0213908	0.00154448	29426064
1672	56L_VISp_m86_1672	56L_VISp@L6	Isocortex.VISp@L6_glu_56L	Isocortex.VISp@L6_glu_56L_m86_1672	150501-2	56L	cs.n	Isocortex	glu	VISp@L6	152	86	M	26.5	1	1	truseq	34933604	34816564	105	0.00335036	0.223725	0.0487841	0.704001	0.022115	0.00137492	26758602
1673	56L_VISp_m87_1673	56L_VISp@L6	Isocortex.VISp@L6_glu_56L	Isocortex.VISp@L6_glu_56L_m87_1673	150501-2	56L	cs.n	Isocortex	glu	VISp@L6	118	87	M	31	1	1	truseq	35637533	35364821	105	0.00765238	0.231562	0.059038	0.686671	0.0210282	0.00170014	26635015
1674	56L_VISp_m87_1674	56L_VISp@L6	Isocortex.VISp@L6_glu_56L	Isocortex.VISp@L6_glu_56L_m87_1674	150501-2	56L	cs.n	Isocortex	glu	VISp@L6	120	87	M	31.9	1	1	truseq	36901135	36638259	105	0.00712379	0.209572	0.0597289	0.707917	0.0209474	0.00183434	28335490
1675	P139_SSs_m38_1675	P139_SSs@L6	Isocortex.SSs@L6_glu_P139	Isocortex.SSs@L6_glu_P139_m38_1675	150501-2	P139	cs.n	Isocortex	glu	SSs@L6	142	38	M	18.9	1	1	truseq	40546868	40343576	105	0.00501375	0.24185	0.0456983	0.687233	0.0235457	0.00167335	30593212
1676	P139_SSs_m38_1676	P139_SSs@L6	Isocortex.SSs@L6_glu_P139	Isocortex.SSs@L6_glu_P139_m38_1676	150501-2	P139	cs.n	Isocortex	glu	SSs@L6	152	38	M	19.6	1	1	truseq	41250062	41008274	105	0.00586152	0.202651	0.0701502	0.701397	0.0240508	0.00175179	31724110
1677	P139_SSs_m39_1677	P139_SSs@L6	Isocortex.SSs@L6_glu_P139	Isocortex.SSs@L6_glu_P139_m39_1677	150501-2	P139	cs.n	Isocortex	glu	SSs@L6	154	39	M	19.9	1	1	truseq	35302519	35171490	105	0.00371161	0.219456	0.0681402	0.6882	0.0220869	0.00211697	26497905
1678	P139_SSs_m39_1678	P139_SSs@L6	Isocortex.SSs@L6_glu_P139	Isocortex.SSs@L6_glu_P139_m39_1678	150501-2	P139	cs.n	Isocortex	glu	SSs@L6	165	39	M	19.2	1	1	truseq	36378121	36265393	105	0.00309879	0.25291	0.0591201	0.663822	0.0228121	0.00133576	26466291
1711	Sla.KJ303.Ai_CUL4..5mo_m73_1711	Sla.KJ303.Ai_CUL4..5mo	CB.CUL4, 5mo_GABA_Sla.KJ303	CB.CUL4, 5mo_GABA_Sla.KJ303_m73_1711	150527-1	Sla.KJ303.Ai14	cs.n	CB	GABA	CUL4..5mo	132	73	M	24.5	1	1	truseq	36509467	36100854	105	0.011192	0.155163	0.0561828	0.76437	0.0225377	0.00174686	30343453
1712	Sla.KJ303.Ai_CUL4..5mo_f85_1712	Sla.KJ303.Ai_CUL4..5mo	CB.CUL4, 5mo_GABA_Sla.KJ303	CB.CUL4, 5mo_GABA_Sla.KJ303_f85_1712	150527-1	Sla.KJ303.Ai14	cs.n	CB	GABA	CUL4..5mo	126	85	F	19.6	1	1	truseq	40130815	39626766	105	0.0125601	0.185922	0.0507589	0.740324	0.0212704	0.0017251	32268229
1713	Sla.KJ303.Ai_CUL4..5mo_f86_1713	Sla.KJ303.Ai_CUL4..5mo	CB.CUL4, 5mo_GABA_Sla.KJ303	CB.CUL4, 5mo_GABA_Sla.KJ303_f86_1713	150527-1	Sla.KJ303.Ai14	cs.n	CB	GABA	CUL4..5mo	152	86	F	19.4	1	1	truseq	41742406	41304599	105	0.0104883	0.176971	0.0573494	0.743266	0.0207297	0.00168422	33613772
1714	Sla.KJ303.Ai_CUL4..5mo_f74_1714	Sla.KJ303.Ai_CUL4..5mo	CB.CUL4, 5mo_GABA_Sla.KJ303	CB.CUL4, 5mo_GABA_Sla.KJ303_f74_1714	150527-1	Sla.KJ303.Ai14	cs.n	CB	GABA	CUL4..5mo	131	74	F	22.9	1	1	truseq	35482910	35208053	105	0.00774618	0.246977	0.0562581	0.675973	0.0191544	0.00163764	25991524
1716	Sla.KJ303.Ai_MOBgr_f56_1716	Sla.KJ303.Ai_MOBgr	OLF.MOBgr_GABA_Sla.KJ303	OLF.MOBgr_GABA_Sla.KJ303_f56_1716	150527-1	Sla.KJ303.Ai14	cs.n	OLF	GABA	MOBgr	107	56	F	17	1	1	truseq	31819205	31365047	105	0.0142731	0.14434	0.0538516	0.781071	0.0190849	0.00165254	26681111
1718	Sla.KJ303.Ai_MOBgr_m57_1718	Sla.KJ303.Ai_MOBgr	OLF.MOBgr_GABA_Sla.KJ303	OLF.MOBgr_GABA_Sla.KJ303_m57_1718	150527-1	Sla.KJ303.Ai14	cs.n	OLF	GABA	MOBgr	122	57	M	22.4	1	1	truseq	40683407	40397909	105	0.00701755	0.120994	0.0483331	0.809401	0.0198367	0.00143547	35268370
1719	Sla.KJ319.AI_@Sp.L_m72_1719	Sla.KJ319.AI_@Sp.L	@Sp.L_GABA_Sla.KJ319	@Sp.L_GABA_Sla.KJ319_m72_1719	150527-2	Sla.KJ319.Ai14	cs.n	others	GABA	@Sp.L	107	72	M	31.6	1	1	truseq	42875022	42717966	105	0.00366311	0.192342	0.046311	0.739338	0.0205769	0.00143221	34280041
1720	Sla.KJ319.AI_CLA_m72_1720	Sla.KJ319.AI_CLA	CTXsp.CLA_glu_Sla.KJ319	CTXsp.CLA_glu_Sla.KJ319_m72_1720	150527-2	Sla.KJ319.Ai14	cs.n	CTXsp	glu	CLA	125	72	M	31.6	1	1	truseq	34629548	34466298	105	0.00471418	0.256942	0.0551396	0.663152	0.023127	0.00163922	25227878
1721	Sla.KJ319.AI_@Sp.L_m49_1721	Sla.KJ319.AI_@Sp.L	@Sp.L_GABA_Sla.KJ319	@Sp.L_GABA_Sla.KJ319_m49_1721	150527-2	Sla.KJ319.Ai14	cs.n	others	GABA	@Sp.L	85	49	M	25.7	1	1	truseq	38574776	38308908	105	0.00689228	0.118904	0.0560468	0.803035	0.02024	0.00177418	33291029
1722	Sla.KJ319.AI_CLA_m49_1722	Sla.KJ319.AI_CLA	CTXsp.CLA_glu_Sla.KJ319	CTXsp.CLA_glu_Sla.KJ319_m49_1722	150527-2	Sla.KJ319.Ai14	cs.n	CTXsp	glu	CLA	106	49	M	25.7	1	1	truseq	34953815	34788361	105	0.0047335	0.226335	0.0516325	0.697878	0.0227422	0.00141214	26628740
1723	Sla.KJ319.AI_@Sp.L_f50_1723	Sla.KJ319.AI_@Sp.L	@Sp.L_GABA_Sla.KJ319	@Sp.L_GABA_Sla.KJ319_f50_1723	150527-2	Sla.KJ319.Ai14	cs.n	others	GABA	@Sp.L	103	50	F	18.4	1	1	truseq	36326996	36168361	105	0.00436686	0.193984	0.0567462	0.725248	0.0222468	0.0017757	28678905
1724	Sla.KJ319.AI_CLA_f50_1724	Sla.KJ319.AI_CLA	CTXsp.CLA_glu_Sla.KJ319	CTXsp.CLA_glu_Sla.KJ319_f50_1724	150527-2	Sla.KJ319.Ai14	cs.n	CTXsp	glu	CLA	96	50	F	18.4	1	1	truseq	35703656	35491382	105	0.00594544	0.181039	0.0531705	0.74206	0.0222313	0.00149853	28766995
1725	Sla.KJ319.AI_@Sp.L_f42_1725	Sla.KJ319.AI_@Sp.L	@Sp.L_GABA_Sla.KJ319	@Sp.L_GABA_Sla.KJ319_f42_1725	150527-2	Sla.KJ319.Ai14	cs.n	others	GABA	@Sp.L	85	42	F	19	1	1	truseq	37086918	36849135	105	0.00641151	0.140459	0.0535051	0.782673	0.02182	0.00154248	31365746
1726	Sla.KJ319.AI_CLA_f42_1726	Sla.KJ319.AI_CLA	CTXsp.CLA_glu_Sla.KJ319	CTXsp.CLA_glu_Sla.KJ319_f42_1726	150527-2	Sla.KJ319.Ai14	cs.n	CTXsp	glu	CLA	121	42	F	19	1	1	truseq	29190371	29067482	105	0.00420992	0.222575	0.0441319	0.710254	0.021468	0.00157048	22508302
1750	wt.IRT.inj_Ssp_f102_1750	wt.IRT.inj_SSp	Isocortex.SSp@L5_glu_wt.IRT.inj	Isocortex.SSp@L5_glu_wt.IRT.inj_f102_1750	150618-1	wt.IRT.inj	cs.n	Isocortex	glu	Ssp@L5	95	102	F	20.4	1	1	truseq	28546350	28522477	105	0.000836289	0.352501	0.0493673	0.572995	0.0235974	0.00153959	18202477
1751	wt.IRT.inj_Ssp_m_1751	wt.IRT.inj_SSp	Isocortex.SSp@L5_glu_wt.IRT.inj	Isocortex.SSp@L5_glu_wt.IRT.inj_m_1751	150618-1	wt.IRT.inj	cs.n	Isocortex	glu	Ssp@L5	46		M	28.5	1	1	truseq	25730164	25638088	105	0.00357852	0.239869	0.0633447	0.670556	0.0241311	0.00209883	18992172
1752	wt.BPn.inj_Ssp_m_1752	wt.BPn.inj_SSp	Isocortex.SSp@L5_glu_wt.BPn.inj	Isocortex.SSp@L5_glu_wt.BPn.inj_m_1752	150618-1	wt.BPn.inj	cs.n	Isocortex	glu	Ssp@L5	82		M	24.9	1	1	truseq	26577048	26547116	105	0.00112623	0.291443	0.056863	0.624987	0.024896	0.0018101	18411182
1753	wt.BPn.inj_Ssp_m129_1753	wt.BPn.inj_SSp	Isocortex.SSp@L5_glu_wt.BPn.inj	Isocortex.SSp@L5_glu_wt.BPn.inj_m129_1753	150618-1	wt.BPn.inj	cs.n	Isocortex	glu	Ssp@L5	40	129	M		1	1	truseq	27759068	27692701	105	0.00239082	0.371811	0.0529942	0.551314	0.0221915	0.00168983	17011284
1754	Cdhr1.KG76.Ai14_CUL4..5gr_f72_1754	Cdhr1.KGx6.Ai14_CUL4..5gr	CB.CUL4, 5gr_GABA_Cdhr1.KG76	CB.CUL4, 5gr_GABA_Cdhr1.KG76_f72_1754	150618-1	Cdhr1.KG76.Ai14	cs.n	CB	GABA	CUL4..5gr	64	72	F	23.9	1	1	truseq	30512364	30491317	105	0.000689786	0.329919	0.0521814	0.591895	0.0244151	0.00158888	20040751
1755	Cdhr1.KG66.Ai14_CUL4..5gr_f132_1755	Cdhr1.KGx6.Ai14_CUL4..5gr	CB.CUL4, 5gr_GABA_Cdhr1.KG66	CB.CUL4, 5gr_GABA_Cdhr1.KG66_f132_1755	150618-1	Cdhr1.KG66.Ai14	cs.n	CB	GABA	CUL4..5gr	84	132	F	21.7	1	1	truseq	34239590	34224843	105	0.0004307	0.312126	0.0525755	0.60975	0.0239637	0.00158402	23053286
1756	Sla.KJ303.Ai14_ECT_m71_1756	Sla.KJ303.Ai14_ECT	Isocortex.ECT_glu_Sla.KJ303	Isocortex.ECT_glu_Sla.KJ303_m71_1756	150618-1	Sla.KJ303.Ai14	cs.n	Isocortex	glu	ECT	102	71	M	23.6	1	1	truseq	28639825	28615000	105	0.0008668	0.20253	0.0477922	0.723654	0.0246263	0.00139668	22697310
1757	Sla.KJ303.Ai14_ECT_m57_1757	Sla.KJ303.Ai14_ECT	Isocortex.ECT_glu_Sla.KJ303	Isocortex.ECT_glu_Sla.KJ303_m57_1757	150618-1	Sla.KJ303.Ai14	cs.n	Isocortex	glu	ECT	98	57	M	22.4	1	1	truseq	28896981	28856691	105	0.00139426	0.276136	0.0587758	0.638854	0.0240327	0.00220147	20391679
1758	GFAP_Isocortex_m159_1758	GFAP_Isocortex	Isocortex__GFAP	Isocortex__GFAP_m159_1758	150618-2	GFAP	cs.o	Isocortex		Isocortex	110	159	M	29.2	1	1	truseq	32829316	32638929	105	0.0057993	0.325548	0.0579705	0.597586	0.0174119	0.00148399	21316162
1759	GFAP_Isocortex_m159_1759	GFAP_Isocortex	Isocortex__GFAP	Isocortex__GFAP_m159_1759	150618-2	GFAP	cs.o	Isocortex		Isocortex	103	159	M	31.2	1	1	truseq	28316328	28126215	105	0.0067139	0.36752	0.0609705	0.552142	0.0175803	0.0017873	17122057
1760	GFAP_Isocortex_m160_1760	GFAP_Isocortex	Isocortex__GFAP	Isocortex__GFAP_m160_1760	150618-2	GFAP	cs.o	Isocortex		Isocortex	138	160	M	26.8	1	1	truseq	24815375	24704910	105	0.00445147	0.370633	0.0534878	0.556415	0.0180407	0.00142308	15108219
1761	GFAP_Isocortex_m160_1761	GFAP_Isocortex	Isocortex__GFAP	Isocortex__GFAP_m160_1761	150618-2	GFAP	cs.o	Isocortex		Isocortex	136	160	M	27.8	1	1	truseq	24774543	24626528	105	0.00597448	0.424651	0.0628162	0.493263	0.0176378	0.00163214	13503968
1762	NPY-hrGFP_ARH_m55_1762	NPY-hrGFP_ARH	HY.ARH_GABA_NPY-hrGFP	HY.ARH_GABA_NPY-hrGFP_m55_1762	150618-2	NPY-hrGFP	cs.n	HY	GABA	ARH	102	55	M	22.4	1	1	truseq	30798691	30738449	105	0.00195599	0.237316	0.0580559	0.67986	0.0232327	0.00153576	22994980
1763	NPY-hrGFP_ARH_m55_1763	NPY-hrGFP_ARH	HY.ARH_GABA_NPY-hrGFP	HY.ARH_GABA_NPY-hrGFP_m55_1763	150618-2	NPY-hrGFP	cs.n	HY	GABA	ARH	132	55	M	18.9	1	1	truseq	30178540	30134972	105	0.00144367	0.257915	0.0660604	0.650513	0.0237837	0.00172779	21711590
1782	P170_BST_m36_1782	P170_BST	PAL.BST_GABA_P170	PAL.BST_GABA_P170_m36_1782	150629-1	P170	cs.n	PAL	GABA	BST	101	36	M	19.4	1	1	truseq	45296513	45145185	140	0.00334083	0.196824	0.0804994	0.701086	0.0197646	0.00182536	34278655
1783	P170_MPN_m36_1783	P170_MPN	HY.MPN_GABA_P170	HY.MPN_GABA_P170_m36_1783	150629-1	P170	cs.n	HY	GABA	MPN	113	36	M	19.4	1	1	truseq	42009012	41861300	140	0.0035162	0.196458	0.0933511	0.689458	0.0191001	0.00163301	31231184
1784	P170_BST_m36_1784	P170_BST	PAL.BST_GABA_P170	PAL.BST_GABA_P170_m36_1784	150629-1	P170	cs.n	PAL	GABA	BST	91	36	M	19.2	1	1	truseq	44591368	44428553	140	0.00365127	0.122428	0.0911006	0.766173	0.0185356	0.00176335	36542076
1785	P170_MPN_m36_1785	P170_MPN	HY.MPN_GABA_P170	HY.MPN_GABA_P170_m36_1785	150629-1	P170	cs.n	HY	GABA	MPN	145	36	M	19.2	1	1	truseq	43132915	43020684	140	0.00260198	0.165918	0.0792909	0.734982	0.0181033	0.00170641	33927307
1786	P170_BST_m37_1786	P170_BST	PAL.BST_GABA_P170	PAL.BST_GABA_P170_m37_1786	150629-1	P170	cs.n	PAL	GABA	BST	30	37	M	18.7	1	1	truseq	31699991	31249771	140	0.0142025	0.127561	0.0960616	0.754655	0.0191401	0.00258168	25739663
1787	P170_MPN_m37_1787	P170_MPN	HY.MPN_GABA_P170	HY.MPN_GABA_P170_m37_1787	150629-1	P170	cs.n	HY	GABA	MPN	110	37	M	18.7	1	1	truseq	37851762	37790049	140	0.00163039	0.083043	0.09409	0.804287	0.016872	0.00170833	32308603
1788	P170_BST_m37_1788	P170_BST	PAL.BST_GABA_P170	PAL.BST_GABA_P170_m37_1788	150629-1	P170	cs.n	PAL	GABA	BST	52	37	M	17.7	1	1	truseq	21455207	21329475	140	0.00586021	0.0983945	0.0868274	0.795008	0.0178615	0.00190905	18182816
1789	P170_MPN_m37_1789	P170_MPN	HY.MPN_GABA_P170	HY.MPN_GABA_P170_m37_1789	150629-1	P170	cs.n	HY	GABA	MPN	125	37	M	17.7	1	1	truseq	44729514	44634663	140	0.00212055	0.168173	0.255732	0.559487	0.0149889	0.00161948	26966731
1790	SHEN_VTA.CTR__1790	SHEN_VTA.CTR	MB.VTA_glu,GABA,DA_SHEN	MB.VTA_glu,GABA,DA_SHEN__1790	150720-1	SHEN	ti.b	MB	glu,GABA,DA	VTA							truseq	42554507	42554507	101	0	0.0595049	0.0820113	0.824926	0.0330333	0.000524176	39109657
1791	SHEN_VTA.CTR__1791	SHEN_VTA.CTR	MB.VTA_glu,GABA,DA_SHEN	MB.VTA_glu,GABA,DA_SHEN__1791	150720-1	SHEN	ti.b	MB	glu,GABA,DA	VTA							truseq	31934832	31934832	101	0	0.0600271	0.0916206	0.813922	0.0338708	0.000559769	29064449
1792	SHEN_VTA.CTR__1792	SHEN_VTA.CTR	MB.VTA_glu,GABA,DA_SHEN	MB.VTA_glu,GABA,DA_SHEN__1792	150720-1	SHEN	ti.b	MB	glu,GABA,DA	VTA							truseq	3.14374e+07	3.14374e+07	100	0	0.0452369	0.0701903	0.848371	0.0357169	0.000485168	29883828
1802	LU_CB_60_1802	LU_CB	CB_glu,GABA_LU	CB_glu,GABA_LU_60_1802	150720-13	LU	ti.b	CB	glu,GABA	CB		60					truseq	4.20057e+07	4.20057e+07	50	0	0.0543556	0.0756547	0.811173	0.0555491	0.00326729	41070572
1803	LU_CB_60_1803	LU_CB	CB_glu,GABA_LU	CB_glu,GABA_LU_60_1803	150720-13	LU	ti.b	CB	glu,GABA	CB		60					truseq	4.06794e+07	4.06794e+07	50	0	0.058126	0.0744369	0.808395	0.0575997	0.0014428	39960542
1804	LU_CB_60_1804	LU_CB	CB_glu,GABA_LU	CB_glu,GABA_LU_60_1804	150720-13	LU	ti.b	CB	glu,GABA	CB		60					truseq	1.53931e+07	1.53931e+07	50	0	0.0521757	0.04518	0.848557	0.0522364	0.00185108	15498190
1806	Tph2-EGFP_RPA_m150_1806	Tph2-EGFP_RPA	MY.RPA_5HT_Tph2-EGFP	MY.RPA_5HT_Tph2-EGFP_m150_1806	150805-1	Tph2-EGFP	cs.n	MY	5HT	RPA	102	150	M	37.5	1	1	truseq	36037304	36016540	105	0.000576181	0.21416	0.0580123	0.702974	0.0235884	0.00126553	27748277
1807	Tph2-EGFP_RPA_m151_1807	Tph2-EGFP_RPA	MY.RPA_5HT_Tph2-EGFP	MY.RPA_5HT_Tph2-EGFP_m151_1807	150805-1	Tph2-EGFP	cs.n	MY	5HT	RPA	120	151	M	31.4	1	1	truseq	37384824	37369636	105	0.000406261	0.224883	0.0635039	0.689934	0.020223	0.00145613	28017730
1808	Tph2-EGFP_RPA_m151_1808	Tph2-EGFP_RPA	MY.RPA_5HT_Tph2-EGFP	MY.RPA_5HT_Tph2-EGFP_m151_1808	150805-1	Tph2-EGFP	cs.n	MY	5HT	RPA	125	151	M	35.1	1	1	truseq	35806887	35781393	105	0.000711986	0.250278	0.0582512	0.667185	0.0229667	0.00131895	26252298
1810	Tph2-EGFP_CSm_m133_1810	Tph2-EGFP_CSm	P.CSm_5HT_Tph2-EGFP	P.CSm_5HT_Tph2-EGFP_m133_1810	150805-1	Tph2-EGFP	cs.n	P	5HT	CSm	88	133	M	35.1	1	1	truseq	35026445	35004208	105	0.000634863	0.198805	0.0575275	0.718281	0.0240623	0.00132404	27546072
1811	Tph2-EGFP_CSm_m119_1811	Tph2-EGFP_CSm	P.CSm_5HT_Tph2-EGFP	P.CSm_5HT_Tph2-EGFP_m119_1811	150805-1	Tph2-EGFP	cs.n	P	5HT	CSm	103	119	M	40.3	1	1	truseq	43750639	43703445	105	0.0010787	0.27007	0.0558354	0.646556	0.0263139	0.00122498	31496936
1812	Tph2-EGFP_CSm_m119_1812	Tph2-EGFP_CSm	P.CSm_5HT_Tph2-EGFP	P.CSm_5HT_Tph2-EGFP_m119_1812	150805-1	Tph2-EGFP	cs.n	P	5HT	CSm	101	119	M	30.9	1	1	truseq	41413902	41372377	105	0.00100268	0.216678	0.0574417	0.699027	0.025444	0.00140915	31945157
1813	Ins1-EGFP_@pancreas_m182_1813	Ins1-EGFP_@pancreas	@pancreas__Ins1-EGFP	@pancreas__Ins1-EGFP_m182_1813	150804-1	Ins1-EGFP	cs.o	others		@pancreas	90	182	M	26.6	1	1	truseq	31665659	31600659	103	0.0020527	0.175445	0.0640695	0.744013	0.0148057	0.0016669	24882351
1814	Ins1-EGFP_@pancreas_m182_1814	Ins1-EGFP_@pancreas	@pancreas__Ins1-EGFP	@pancreas__Ins1-EGFP_m182_1814	150804-1	Ins1-EGFP	cs.o	others		@pancreas	92	182	M	27.2	1	1	truseq	39894216	39772543	103	0.00304989	0.169657	0.0637913	0.749225	0.0152011	0.00212521	31678256
1815	Ins1-EGFP_@pancreas_m183_1815	Ins1-EGFP_@pancreas	@pancreas__Ins1-EGFP	@pancreas__Ins1-EGFP_m183_1815	150804-1	Ins1-EGFP	cs.o	others		@pancreas	104	183	M	25.4	1	1	truseq	32047571	31986117	103	0.00191759	0.171392	0.0667129	0.744516	0.0156799	0.00169852	25317803
1816	Ins1-EGFP_@pancreas_m183_1816	Ins1-EGFP_@pancreas	@pancreas__Ins1-EGFP	@pancreas__Ins1-EGFP_m183_1816	150804-1	Ins1-EGFP	cs.o	others		@pancreas	102	183	M	25.4	1	1	truseq	38242993	38150646	103	0.00241474	0.240006	0.0634333	0.6807	0.0142306	0.00163075	27562913
1823	Tph2-EGFP_DR_f133_1823	Tph2-EGFP_DR	MB.DR_5HT_Tph2-EGFP	MB.DR_5HT_Tph2-EGFP_f133_1823	150804-2	Tph2-EGFP	cs.n	MB	5HT	DR	99	133	F	21.3	1	1	truseq	34633613	34587808	105	0.00132256	0.248757	0.139971	0.58734	0.0225523	0.00137956	22537819
1824	Tph2-EGFP_DR_f133_1824	Tph2-EGFP_DR	MB.DR_5HT_Tph2-EGFP	MB.DR_5HT_Tph2-EGFP_f133_1824	150804-2	Tph2-EGFP	cs.n	MB	5HT	DR	83	133	F	35.1	1	1	truseq	33912161	33890373	105	0.000642483	0.227804	0.061059	0.686342	0.0235402	0.00125516	25505744
1825	Tph2-EGFP_DR_m114_1825	Tph2-EGFP_DR	MB.DR_5HT_Tph2-EGFP	MB.DR_5HT_Tph2-EGFP_m114_1825	150804-2	Tph2-EGFP	cs.n	MB	5HT	DR	130	114	M	35.4	1	1	truseq	39834178	39818791	105	0.000386276	0.19597	0.0573115	0.72392	0.0215872	0.00121109	31250233
1826	Tph2-EGFP_DR_m114_1826	Tph2-EGFP_DR	MB.DR_5HT_Tph2-EGFP	MB.DR_5HT_Tph2-EGFP_m114_1826	150804-2	Tph2-EGFP	cs.n	MB	5HT	DR	115	114	M	42.1	1	1	truseq	43931045	43909260	105	0.000495891	0.186598	0.0536813	0.735186	0.0233313	0.00120362	35156432
1827	Tph2-EGFP_DR_m115_1827	Tph2-EGFP_DR	MB.DR_5HT_Tph2-EGFP	MB.DR_5HT_Tph2-EGFP_m115_1827	150804-2	Tph2-EGFP	cs.n	MB	5HT	DR	120	115	M	39.7	1	1	truseq	42611012	42577233	105	0.000792729	0.213702	0.0530587	0.708556	0.023605	0.00107832	33009994
1828	Tph2-EGFP_DR_m115_1828	Tph2-EGFP_DR	MB.DR_5HT_Tph2-EGFP	MB.DR_5HT_Tph2-EGFP_m115_1828	150804-2	Tph2-EGFP	cs.n	MB	5HT	DR	125	115	M	31.5	1	1	truseq	42392225	42368081	105	0.000569538	0.189286	0.0563482	0.729193	0.0227274	0.00244524	33628131
1829	Tmem90.TD24.Ai_CA3_m47_1829	Tmem90.TD24.Ai_CA3	HPF.CA3_glu_Tmem90.TD24	HPF.CA3_glu_Tmem90.TD24_m47_1829	150824-1	Tmem90.TD24.Ai9	cs.n	HPF	glu	CA3	73	47	M		1	1	truseq	39506554	39474611	105	0.000808549	0.166715	0.0541363	0.758163	0.01959	0.00139482	32118219
1830	Tmem90.TD24.Ai_CA3_m47_1830	Tmem90.TD24.Ai_CA3	HPF.CA3_glu_Tmem90.TD24	HPF.CA3_glu_Tmem90.TD24_m47_1830	150824-1	Tmem90.TD24.Ai9	cs.n	HPF	glu	CA3	81	47	M		1	1	truseq	37744063	37717368	105	0.000707264	0.208479	0.0597933	0.708422	0.0217538	0.00155204	29034958
1831	Tmem90.TD24.Ai_CA3_m47_1831	Tmem90.TD24.Ai_CA3	HPF.CA3_glu_Tmem90.TD24	HPF.CA3_glu_Tmem90.TD24_m47_1831	150824-1	Tmem90.TD24.Ai9	cs.n	HPF	glu	CA3	104	47	M		1	1	truseq	32048735	32022220	105	0.000827334	0.256785	0.0480931	0.67367	0.0201713	0.00128049	23412680
1832	Tmem90.TD24.Ai_CA3_m47_1832	Tmem90.TD24.Ai_CA3	HPF.CA3_glu_Tmem90.TD24	HPF.CA3_glu_Tmem90.TD24_m47_1832	150824-1	Tmem90.TD24.Ai9	cs.n	HPF	glu	CA3	83	47	M		1	1	truseq	38637469	38595550	105	0.00108493	0.178414	0.0566347	0.742781	0.0208225	0.00134744	30957895
1837	Tmem90.TD24.Ai_CA3_m26_1837	Tmem90.TD24.Ai_CA3	HPF.CA3_glu_Tmem90.TD24	HPF.CA3_glu_Tmem90.TD24_m26_1837	150824-2	Tmem90.TD24.Ai3	cs.n	HPF	glu	CA3	40	26	M		1	1	truseq	42254075	42157995	105	0.00227386	0.265117	0.110785	0.601298	0.0207644	0.00203458	27909934
1838	Tmem90.TD24.Ai_CA3_m26_1838	Tmem90.TD24.Ai_CA3	HPF.CA3_glu_Tmem90.TD24	HPF.CA3_glu_Tmem90.TD24_m26_1838	150824-2	Tmem90.TD24.Ai3	cs.n	HPF	glu	CA3	45	26	M		1	1	truseq	37817758	37714068	105	0.00274183	0.245775	0.0628061	0.669889	0.0202247	0.00130532	27509546
1839	TH-GFP_SNc_m182_1839	TH_SNc	MB.SNc_DA_TH-GFP	MB.SNc_DA_TH-GFP_m182_1839	150824-2	TH-GFP	cs.n	MB	DA	SNc	96	182	M	30.9	1	1	truseq	33381024	33355526	105	0.000763847	0.299573	0.045448	0.630514	0.0231828	0.00128201	23218706
1840	TH-GFP_SNc_m182_1840	TH_SNc	MB.SNc_DA_TH-GFP	MB.SNc_DA_TH-GFP_m182_1840	150824-2	TH-GFP	cs.n	MB	DA	SNc	47	182	M	29.8	1	1	truseq	40597144	40532929	105	0.00158176	0.251479	0.0453344	0.678003	0.0237766	0.00140673	30250365
1843	TH-GFP_VTA_m116_1843	TH-GFP_VTA	MB.VTA_DA_TH-GFP	MB.VTA_DA_TH-GFP_f116_1843	150824-2	TH-GFP	cs.n	MB	DA	VTA	76	116	F		1	1	truseq	32987756	32929374	105	0.00176981	0.229171	0.0559476	0.688657	0.024716	0.00150814	25008737
1844	TH-GFP_VTA_m116_1844	TH-GFP_VTA	MB.VTA_DA_TH-GFP	MB.VTA_DA_TH-GFP_f116_1844	150824-2	TH-GFP	cs.n	MB	DA	VTA	88	116	F		1	1	truseq	37879589	37840401	105	0.00103454	0.224669	0.0491056	0.70084	0.0232572	0.00212781	29050093
165	Sim1.KJ27.Ai9_CA1_m31_165	Sim1.KJ27.Ai_CA1	HPF.CA1_glu_Sim1.KJ27	HPF.CA1_glu_Sim1.KJ27_m31_165	130418-2	Sim1.KJ27.Ai9	cs.n	HPF	glu	CA1	122	31	M	20.3	2.44	1	truseq	50055421	49933679	95	0.00243214	0.197599	0.0635461	0.709263	0.0295246	6.73694e-05	39588897
166	Sim1.KJ27.Ai9_CA1_m31_166	Sim1.KJ27.Ai_CA1	HPF.CA1_glu_Sim1.KJ27	HPF.CA1_glu_Sim1.KJ27_m31_166	130418-2	Sim1.KJ27.Ai9	cs.n	HPF	glu	CA1	140	31	M	20.9	2.8	1	truseq	47772165	47677689	95	0.00197764	0.175417	0.0440277	0.752524	0.0278494	0.000182161	39621789
167	Sim1.KJ27.Ai9_CA1_m32_167	Sim1.KJ27.Ai_CA1	HPF.CA1_glu_Sim1.KJ27	HPF.CA1_glu_Sim1.KJ27_m32_167	130418-2	Sim1.KJ27.Ai9	cs.n	HPF	glu	CA1	110	32	M	22.4	2.2	1	truseq	41421699	41300147	95	0.0029345	0.227238	0.0462586	0.695148	0.0312978	5.78933e-05	32361529
406	Calb1-EGFP_CA1sp_f23_406	Calb1-EGFP_CA1sp	HPF.CA1sp_glu_Calb1-EGFP	HPF.CA1sp_glu_Calb1-EGFP_f23_406	130820-2	Calb1-EGFP	cs.n	HPF	glu	CA1sp	48	23	F	9.4	0.96	1	truseq	45218057	45169950	95	0.00106389	0.211447	0.0510892	0.71084	0.0265716	5.21586e-05	35459902
407	Calb1-EGFP_CA1sp_f23_407	Calb1-EGFP_CA1sp	HPF.CA1sp_glu_Calb1-EGFP	HPF.CA1sp_glu_Calb1-EGFP_f23_407	130820-2	Calb1-EGFP	cs.n	HPF	glu	CA1sp	60	23	F	14.1	1.2	1	truseq	39821461	39772322	95	0.00123398	0.217323	0.0477198	0.706963	0.0279084	8.54866e-05	31216765
408	Calb1-EGFP_CA1sp_m23_408	Calb1-EGFP_CA1sp	HPF.CA1sp_glu_Calb1-EGFP	HPF.CA1sp_glu_Calb1-EGFP_m23_408	130820-2	Calb1-EGFP	cs.n	HPF	glu	CA1sp	128	23	M	11.5	2.56	1	truseq	59437855	59283105	95	0.00260356	0.203466	0.0412439	0.725475	0.0297601	5.57494e-05	47951450
648	Sim1.KJ27.Ai9_CA2_m22_648	Sim1.KJ27.Ai_CA2	HPF.CA2_glu_Sim1.KJ27	HPF.CA2_glu_Sim1.KJ27_m22_648	130800-1	Sim1.KJ27.Ai9	cs.n	HPF	glu	CA2	120	22	M	10.5	2.4	1	truseq	30159353	30128719	100	0.00101574	0.218143	0.0459294	0.706478	0.0293815	6.80746e-05	23703893
649	Sim1.KJ27.Ai9_CA2_m22_649	Sim1.KJ27.Ai_CA2	HPF.CA2_glu_Sim1.KJ27	HPF.CA2_glu_Sim1.KJ27_m22_649	130800-1	Sim1.KJ27.Ai9	cs.n	HPF	glu	CA2	35	22	M	8.6	0.7	1	truseq	28116091	28115101	100	3.52112e-05	0.194935	0.0513635	0.727961	0.0256874	5.36722e-05	22442366
650	Sim1.KJ27.Ai9_CA2_m23_650	Sim1.KJ27.Ai_CA2	HPF.CA2_glu_Sim1.KJ27	HPF.CA2_glu_Sim1.KJ27_m23_650	130800-1	Sim1.KJ27.Ai9	cs.n	HPF	glu	CA2	72	23	M	10.4	1.44	1	truseq	29173660	29172181	100	5.06964e-05	0.239671	0.055335	0.677747	0.0271809	6.61589e-05	21925384
947	Vipr2.KE2.Ai9_CA1@ventral_m28_947	Vipr2.KE2.Ai_CA1@ventral	HPF.CA1@ventral_glu_Vipr2.KE2	HPF.CA1@ventral_glu_Vipr2.KE2_m28_947	140417-2	Vipr2.KE2.Ai9	cs.n	HPF	glu	CA1@ventral	57	28	M	18.4	10	1	truseq	36987557	35076661	100	0.0516632	0.174097	0.0456686	0.756887	0.0232943	5.31693e-05	30727626
948	Vipr2.KE2.Ai9_CA1@ventral_m28_948	Vipr2.KE2.Ai_CA1@ventral	HPF.CA1@ventral_glu_Vipr2.KE2	HPF.CA1@ventral_glu_Vipr2.KE2_m28_948	140417-2	Vipr2.KE2.Ai9	cs.n	HPF	glu	CA1@ventral	115	28	M	18.1	10	1	truseq	24304558	23737800	100	0.023319	0.193263	0.0425986	0.73931	0.0245669	0.00026144	19696941
949	Vipr2.KE2.Ai9_CA1@ventral_m28_949	Vipr2.KE2.Ai_CA1@ventral	HPF.CA1@ventral_glu_Vipr2.KE2	HPF.CA1@ventral_glu_Vipr2.KE2_m28_949	140417-2	Vipr2.KE2.Ai9	cs.n	HPF	glu	CA1@ventral	110	28	M	18.2	10	1	truseq	34725637	34061859	100	0.0191149	0.224091	0.0404971	0.709129	0.026207	7.60968e-05	27223961
1061	Mpp3.KG118.Ai9_CA3sp@ventral_m27_1061	Mpp3.KG118.Ai_CA3sp@ventral	HPF.CA3sp@ventral_glu_Mpp3.KG118	HPF.CA3sp@ventral_glu_Mpp3.KG118_m27_1061	140702-1	Mpp3.KG118.Ai9	cs.n	HPF	glu	CA3sp@ventral	52	27	M	15	1	1	truseq	41695022	41556365	100	0.0033255	0.246237	0.0603135	0.670663	0.0226994	8.69181e-05	30596144
1063	Mpp3.KG118.Ai9_CA3sp@ventral_m27_1063	Mpp3.KG118.Ai_CA3sp@ventral	HPF.CA3sp@ventral_glu_Mpp3.KG118	HPF.CA3sp@ventral_glu_Mpp3.KG118_m27_1063	140702-1	Mpp3.KG118.Ai9	cs.n	HPF	glu	CA3sp@ventral	60	27	M	13.2	1	1	truseq	31452573	31367824	100	0.0026945	0.208009	0.0569493	0.71327	0.0216992	7.25903e-05	24346305
1199	Vipr2.KE2.Ai9_CA1_m28_1199	Vipr2.KE2.Ai_CA1	HPF.CA1_glu_Vipr2.KE2	HPF.CA1_glu_Vipr2.KE2_m28_1199	141001-1	Vipr2.KE2.Ai9	cs.n	HPF	glu	CA1	116	28	M	15	1	1	truseq	49892005	49677561	93	0.00429816	0.200158	0.0394318	0.736256	0.0241262	2.87454e-05	40066595
1200	Vipr2.KE2.Ai9_CA1_m28_1200	Vipr2.KE2.Ai_CA1	HPF.CA1_glu_Vipr2.KE2	HPF.CA1_glu_Vipr2.KE2_m28_1200	141001-1	Vipr2.KE2.Ai9	cs.n	HPF	glu	CA1	126	28	M	15.7	1	1	truseq	56428424	56237020	93	0.00339198	0.20008	0.035839	0.738617	0.025434	3.00692e-05	45595795
1202	Vipr2.KE2.Ai9_CA1_f29_1202	Vipr2.KE2.Ai_CA1	HPF.CA1_glu_Vipr2.KE2	HPF.CA1_glu_Vipr2.KE2_f29_1202	141001-1	Vipr2.KE2.Ai9	cs.n	HPF	glu	CA1	113	29	F	13.7	1	1	truseq	38033894	37799137	93	0.00617231	0.214859	0.041988	0.718445	0.0246695	3.83607e-05	29930053
1203	Mpp3.KG118.Ai14_CA3sp@ventral_f35_1203	Mpp3.KG118.Ai_CA3sp@ventral	HPF.CA3sp@ventral_glu_Mpp3.KG118	HPF.CA3sp@ventral_glu_Mpp3.KG118_f35_1203	141001-1	Mpp3.KG118.Ai14	cs.n	HPF	glu	CA3sp@ventral	105	35	F	16.8	1	1	truseq	46276381	46129237	93	0.00317968	0.247577	0.0373399	0.688907	0.0261385	3.8067e-05	35203565
1205	Mpp3.KG118.Ai14_CA3sp@ventral_m35_1205	Mpp3.KG118.Ai_CA3sp@ventral	HPF.CA3sp@ventral_glu_Mpp3.KG118	HPF.CA3sp@ventral_glu_Mpp3.KG118_m35_1205	141001-1	Mpp3.KG118.Ai14	cs.n	HPF	glu	CA3sp@ventral	103	35	M	17.2	1	1	truseq	54489435	54347711	93	0.00260094	0.238947	0.0375782	0.696675	0.0267631	3.62849e-05	41959517
1290	Rbp4.KL100.Ai9_DG_m29_1290	Rbp4.KL100.Ai_DG	HPF.DG_glu_Rbp4.KL100	HPF.DG_glu_Rbp4.KL100_m29_1290	141212-2	Rbp4.KL100.Ai9	cs.n	HPF	glu	DG	152	29	M	18.1	3.04	1	truseq	34963364	34749567	94	0.00611489	0.193772	0.0462347	0.74226	0.0177124	2.10362e-05	27798808
1291	Rbp4.KL100.Ai9_DG_m29_1291	Rbp4.KL100.Ai_DG	HPF.DG_glu_Rbp4.KL100	HPF.DG_glu_Rbp4.KL100_m29_1291	141212-2	Rbp4.KL100.Ai9	cs.n	HPF	glu	DG	140	29	M	18.7	2.8	1	truseq	39970850	39706671	94	0.00660929	0.16867	0.0423169	0.770364	0.0184613	0.000187853	32976115
1292	Rbp4.KL100.Ai9_DG_m30_1292	Rbp4.KL100.Ai_DG	HPF.DG_glu_Rbp4.KL100	HPF.DG_glu_Rbp4.KL100_m30_1292	141212-2	Rbp4.KL100.Ai9	cs.n	HPF	glu	DG	156	30	M	19.1	3.12	1	truseq	34611761	34394405	94	0.00627983	0.21711	0.0449584	0.719152	0.0187308	4.86416e-05	26799567
1294	Mpp3.KG118.Ai9_CA3sp@dorsal_f32_1294	Mpp3.KG118.Ai_CA3sp@dorsal	HPF.CA3sp@dorsal_glu_Mpp3.KG118	HPF.CA3sp@dorsal_glu_Mpp3.KG118_f32_1294	141212-2	Mpp3.KG118.Ai9	cs.n	HPF	glu	CA3sp@dorsal	124	32	F	19.7	2.48	1	truseq	35273727	35150430	94	0.00349543	0.289313	0.0444007	0.643097	0.0231655	2.32145e-05	24916995
1295	Mpp3.KG118.Ai9_CA3sp@dorsal_f32_1295	Mpp3.KG118.Ai_CA3sp@dorsal	HPF.CA3sp@dorsal_glu_Mpp3.KG118	HPF.CA3sp@dorsal_glu_Mpp3.KG118_f32_1295	141212-2	Mpp3.KG118.Ai9	cs.n	HPF	glu	CA3sp@dorsal	132	32	F	19.9	2.64	1	truseq	39504550	39393714	94	0.00280565	0.263059	0.0401701	0.673504	0.0232469	1.92416e-05	29123149
1371	Mpp3.KG118.Ai9_CA2_m26_1371	Mpp3.KG118.Ai_CA2	HPF.CA2_glu_Mpp3.KG118	HPF.CA2_glu_Mpp3.KG118_m26_1371	150213-8	Mpp3.KG118.Ai9	cs.n	HPF	glu	CA2	92	26	M	12	1	1	truseq	49070546	49033181	100	0.000761455	0.246183	0.0344187	0.695537	0.0228134	0.001048	37170528
1372	Mpp3.KG118.Ai9_CA2_m26_1372	Mpp3.KG118.Ai_CA2	HPF.CA2_glu_Mpp3.KG118	HPF.CA2_glu_Mpp3.KG118_m26_1372	150213-8	Mpp3.KG118.Ai9	cs.n	HPF	glu	CA2	60	26	M	13.2	1	1	truseq	47934303	47873820	100	0.00126179	0.24932	0.0366624	0.690721	0.0222548	0.00104188	36012168
1373	Mpp3.KG118.Ai9_CA2_f27_1373	Mpp3.KG118.Ai_CA2	HPF.CA2_glu_Mpp3.KG118	HPF.CA2_glu_Mpp3.KG118_f27_1373	150213-8	Mpp3.KG118.Ai9	cs.n	HPF	glu	CA2	75	27	F	13.7	1	1	truseq	47142321	47097500	100	0.000950759	0.234002	0.0349594	0.706843	0.023164	0.00103152	36270359
1374	Mpp3.KG118.Ai9_CA2_f27_1374	Mpp3.KG118.Ai_CA2	HPF.CA2_glu_Mpp3.KG118	HPF.CA2_glu_Mpp3.KG118_f27_1374	150213-8	Mpp3.KG118.Ai9	cs.n	HPF	glu	CA2	95	27	F	12	1	1	truseq	36247255	36222405	100	0.000685569	0.268842	0.0358261	0.670244	0.0240388	0.00104847	26616360
1375	Mpp3.KG118.Ai9_CA3sp@dorsal_m30_1375	Mpp3.KG118.Ai_CA3sp@dorsal	HPF.CA3sp@dorsal_glu_Mpp3.KG118	HPF.CA3sp@dorsal_glu_Mpp3.KG118_m30_1375	150213-8	Mpp3.KG118.Ai9	cs.n	HPF	glu	CA3sp@dorsal	96	30	M	13.8	1	1	truseq	43490322	43462588	100	0.000637705	0.19616	0.0358238	0.742597	0.0243807	0.00103894	35142983
1849	Slc17a7_ECU_1849	Slc17a7_ECU	MY.ECU_glu_Slc17a7	MY.ECU_glu_Slc17a7_f56_1849		Slc17a7	cs.n	MY	glu		34	56	F		1	1	truseq	44308789	44163234	105	0.00328501	0.26104	0.0683941	0.644207	0.0241466	0.00221261	31604285
1850	Slc17a7_ECU_1850	Slc17a7_ECU	MY.ECU_glu_Slc17a7	MY.ECU_glu_Slc17a7_f59_1850		Slc17a7	cs.n	MY	glu		68	59	F		1	1	truseq	37503374	37445247	105	0.00154991	0.314901	0.0643202	0.595569	0.0231656	0.00204418	24781858
1851	Slc17a7_ECU_1851	Slc17a7_ECU	MY.ECU_glu_Slc17a7	MY.ECU_glu_Slc17a7_m51_1851		Slc17a7	cs.n	MY	glu		61	51	M		1	1	truseq	33139232	33086777	105	0.00158287	0.268597	0.0631788	0.644797	0.0214117	0.00201618	23429668
1852	Slc17a7_ECU_1852	Slc17a7_ECU	MY.ECU_glu_Slc17a7	MY.ECU_glu_Slc17a7_m52_1852		Slc17a7	cs.n	MY	glu		37	52	M		1	1	truseq	37316156	37205044	105	0.00297758	0.261883	0.0801552	0.635125	0.0209717	0.00186531	26002244
1853	Slc17a7_PG_1853	Slc17a7_PG	P.PG_glu_Slc17a7	P.PG_glu_Slc17a7_f56_1853		Slc17a7	cs.n	P	glu		117	56	F		1	1	truseq	43375210	43301720	105	0.00169429	0.163788	0.0671832	0.741549	0.0254908	0.00198886	35364734
1854	Slc17a7_PG_1854	Slc17a7_PG	P.PG_glu_Slc17a7	P.PG_glu_Slc17a7_f59_1854		Slc17a7	cs.n	P	glu		77	59	F		1	1	truseq	41870785	41796913	105	0.00176429	0.219915	0.0743921	0.681781	0.0220147	0.00189698	31227524
1855	Slc17a7_PG_1855	Slc17a7_PG	P.PG_glu_Slc17a7	P.PG_glu_Slc17a7_m51_1855		Slc17a7	cs.n	P	glu		131	51	M		1	1	truseq	40899708	40869476	105	0.000739174	0.164918	0.0602016	0.751036	0.0222671	0.00157709	33335496
1856	Slc17a7_PG_1856	Slc17a7_PG	P.PG_glu_Slc17a7	P.PG_glu_Slc17a7_m52_1856		Slc17a7	cs.n	P	glu		56	52	M		1	1	truseq	35371798	35307236	105	0.00182524	0.128548	0.0750665	0.769702	0.0204401	0.00624416	29395980
1857	Slc17a7_LRNm_1857	Slc17a7_LRNm	MY.LRNm_glu_Slc17a7	MY.LRNm_glu_Slc17a7_m35_1857		Slc17a7	cs.n	MY	glu		86	35	M		1	1	truseq	54043883	53989294	105	0.00101009	0.185726	0.0615216	0.728117	0.0229637	0.00167122	42872612
1858	Slc17a7_LRNm_1858	Slc17a7_LRNm	MY.LRNm_glu_Slc17a7	MY.LRNm_glu_Slc17a7_f52_1858		Slc17a7	cs.n	MY	glu		95	52	F		1	1	truseq	36368710	36317098	105	0.00141913	0.192587	0.0640098	0.720015	0.0215472	0.00184112	28435326
1859	Slc17a7_LRNm_1859	Slc17a7_LRNm	MY.LRNm_glu_Slc17a7	MY.LRNm_glu_Slc17a7_f39_1859		Slc17a7	cs.n	MY	glu		90	39	F		1	1	truseq	29964922	29935380	105	0.000985886	0.215478	0.0646992	0.696494	0.0214582	0.00187043	22705807
1860	Slc17a7_LRNm_1860	Slc17a7_LRNm	MY.LRNm_glu_Slc17a7	MY.LRNm_glu_Slc17a7_f39_1860		Slc17a7	cs.n	MY	glu		106	39	F		1	1	truseq	35168732	35121638	105	0.00133909	0.226951	0.0601219	0.688044	0.0232075	0.00167555	26512560
1861	Penk1.Ai14_CUL4..5gr_1861	Penk1.Ai14_CUL4..5gr	CB.CUL4, 5gr_glu_Penk1	CB.CUL4, 5gr_glu_Penk1_m30_1861		Penk1.Ai14	cs.n	CB	glu	CUL4..5gr	81	30	M		1	1	truseq	33876169	33135511	105	0.0218637	0.250461	0.0557225	0.669755	0.0224566	0.00160517	25015171
1862	Penk1.Ai14_CUL4..5gr_1862	Penk1.Ai14_CUL4..5gr	CB.CUL4, 5gr_glu_Penk1	CB.CUL4, 5gr_glu_Penk1_m30_1862		Penk1.Ai14	cs.n	CB	glu	CUL4..5gr	75	30	M		1	1	truseq	36486681	35665615	105	0.0225032	0.214552	0.0622693	0.700066	0.0206361	0.00247659	27910903
1863	Penk1.Ai14_CUL4..5gr_1863	Penk1.Ai14_CUL4..5gr	CB.CUL4, 5gr_glu_Penk1	CB.CUL4, 5gr_glu_Penk1_f30_1863		Penk1.Ai14	cs.n	CB	glu	CUL4..5gr	64	30	F		1	1	truseq	37600303	36738212	105	0.0229278	0.0594719	0.07485	0.849284	0.0148463	0.0015473	33722263
1864	P162_PG_1864	P162_PG	P.PG_glu_P162	P.PG_glu_P162_m13_1864		P162	cs.n	P	glu		115	13	M		1	1	truseq	38703715	38620285	100	0.00215561	0.227359	0.0530394	0.694441	0.0236246	0.00153575	29472384
1865	P162_PG_1865	P162_PG	P.PG_glu_P162	P.PG_glu_P162_m13_1865		P162	cs.n	P	glu		125	13	M		1	1	truseq	38249334	38192035	100	0.00149804	0.2566	0.0501258	0.669155	0.0226966	0.00142284	28056654
1866	P162_PG_1866	P162_PG	P.PG_glu_P162	P.PG_glu_P162_m12_1866		P162	cs.n	P	glu		120	12	M		1	1	truseq	47000330	46959211	100	0.000874866	0.242056	0.0474726	0.686501	0.0225989	0.0013717	35281443
1867	P162_PG_1867	P162_PG	P.PG_glu_P162	P.PG_glu_P162_m12_1867		P162	cs.n	P	glu		125	12	M		1	1	truseq	42539369	42497063	100	0.000994514	0.218888	0.0425394	0.71585	0.0214748	0.00124795	33075947
