# Supplementary material for: Mapping the transcriptional diversity of genetically and anatomically defined cell populations in the mouse brain
Source: eLife journal article supplement (doi:10.7554/elife.38619), 2019-04-12
Supplement: supp [file elife-38619-supp-v1.zip › elife_poa_e38619_Supplementary_file_3.xlsx]

## Sheet: tissue-sampleinfo
name	region	group	sample_class	PMID	dataset_source	dataset_accession	data_id	comment
LU_CB_60_1802	CB	LU_CB	ti.b	25150496	NCBI GEO	GSE60415	SRR1550935	50bp
LU_CB_60_1803	CB	LU_CB	ti.b	25150496	NCBI GEO	GSE60415	SRR1550936	50bp
LU_CB_60_1804	CB	LU_CB	ti.b	25150496	NCBI GEO	GSE60415	SRR1550937	50bp
SHEN_VTA.CTR__1790	VTA	SHEN_VTA.CTR	ti.b	22795644	NCBI GEO	GSE36005	SRR412749
SHEN_VTA.CTR__1791	VTA	SHEN_VTA.CTR	ti.b	22795644	NCBI GEO	GSE36005	SRR412750
SHEN_VTA.CTR__1792	VTA	SHEN_VTA.CTR	ti.b	22795644	NCBI GEO	GSE36005	SRR412751
bb_wc__1505	WholeCortex	BB_WC	ti.b	25186741	NCBI GEO	GSE52564	SRR1033797
bb_wc__1506	WholeCortex	BB_WC	ti.b	25186741	NCBI GEO	GSE52564	SRR1033798
bb_wc__1507	WholeCortex	BB_WC	ti.b	25186741	NCBI GEO	GSE52564	SRR1033799
sanger_heart__1532	Heart	SANGER_@Heart	ti.o	21921910	EMBL-EBI ENA	ERP000591	ERR032227_1	only read 1 is used
sanger_heart__1534	Heart	SANGER_@Heart	ti.o	21921910	EMBL-EBI ENA	ERP000591	ERR032229_1	only read 1 is used
sanger_heart__1535	Heart	SANGER_@Heart	ti.o	21921910	EMBL-EBI ENA	ERP000591	ERR032230_1	only read 1 is used
sanger_heart__1536	Heart	SANGER_@Heart	ti.o	21921910	EMBL-EBI ENA	ERP000591	ERR032231_1	only read 1 is used
sanger_heart__1543	Heart	SANGER_@Heart	ti.o	21921910	EMBL-EBI ENA	ERP000591	ERR032238_1	only read 1 is used
sanger_hippocampus__1537	HPF	SANGER_HPF	ti.b	21921910	EMBL-EBI ENA	ERP000591	ERR032232_1	only read 1 is used
sanger_hippocampus__1538	HPF	SANGER_HPF	ti.b	21921910	EMBL-EBI ENA	ERP000591	ERR032233_1	only read 1 is used
sanger_hippocampus__1539	HPF	SANGER_HPF	ti.b	21921910	EMBL-EBI ENA	ERP000591	ERR032234_1	only read 1 is used
sanger_hippocampus__1540	HPF	SANGER_HPF	ti.b	21921910	EMBL-EBI ENA	ERP000591	ERR032235_1	only read 1 is used
sanger_hippocampus__1541	HPF	SANGER_HPF	ti.b	21921910	EMBL-EBI ENA	ERP000591	ERR032236_1	only read 1 is used
sanger_hippocampus__1542	HPF	SANGER_HPF	ti.b	21921910	EMBL-EBI ENA	ERP000591	ERR032237_1	only read 1 is used
sanger_liver__1509	Liver	SANGER_@Liver	ti.o	21921910	EMBL-EBI ENA	ERP000591	ERR032204_1	only read 1 is used
sanger_liver__1510	Liver	SANGER_@Liver	ti.o	21921910	EMBL-EBI ENA	ERP000591	ERR032205_1	only read 1 is used
sanger_liver__1511	Liver	SANGER_@Liver	ti.o	21921910	EMBL-EBI ENA	ERP000591	ERR032206_1	only read 1 is used
sanger_liver__1512	Liver	SANGER_@Liver	ti.o	21921910	EMBL-EBI ENA	ERP000591	ERR032207_1	only read 1 is used
sanger_liver__1513	Liver	SANGER_@Liver	ti.o	21921910	EMBL-EBI ENA	ERP000591	ERR032208_1	only read 1 is used
sanger_lung__1526	Lung	SANGER_@Lung	ti.o	21921910	EMBL-EBI ENA	ERP000591	ERR032221_1	only read 1 is used
sanger_lung__1527	Lung	SANGER_@Lung	ti.o	21921910	EMBL-EBI ENA	ERP000591	ERR032222_1	only read 1 is used
sanger_lung__1528	Lung	SANGER_@Lung	ti.o	21921910	EMBL-EBI ENA	ERP000591	ERR032223_1	only read 1 is used
sanger_lung__1529	Lung	SANGER_@Lung	ti.o	21921910	EMBL-EBI ENA	ERP000591	ERR032224_1	only read 1 is used
sanger_lung__1530	Lung	SANGER_@Lung	ti.o	21921910	EMBL-EBI ENA	ERP000591	ERR032225_1	only read 1 is used
sanger_lung__1531	Lung	SANGER_@Lung	ti.o	21921910	EMBL-EBI ENA	ERP000591	ERR032226_1	only read 1 is used
sanger_spleen__1515	Spleen	SANGER_@Spleen	ti.o	21921910	EMBL-EBI ENA	ERP000591	ERR032210_1	only read 1 is used
sanger_spleen__1516	Spleen	SANGER_@Spleen	ti.o	21921910	EMBL-EBI ENA	ERP000591	ERR032211_1	only read 1 is used
sanger_spleen__1518	Spleen	SANGER_@Spleen	ti.o	21921910	EMBL-EBI ENA	ERP000591	ERR032213_1	only read 1 is used
sanger_spleen__1519	Spleen	SANGER_@Spleen	ti.o	21921910	EMBL-EBI ENA	ERP000591	ERR032214_1	only read 1 is used
sanger_thymus__1520	Thymus	SANGER_@Thymus	ti.o	21921910	EMBL-EBI ENA	ERP000591	ERR032215_1	only read 1 is used
sanger_thymus__1521	Thymus	SANGER_@Thymus	ti.o	21921910	EMBL-EBI ENA	ERP000591	ERR032216_1	only read 1 is used
sanger_thymus__1522	Thymus	SANGER_@Thymus	ti.o	21921910	EMBL-EBI ENA	ERP000591	ERR032217_1	only read 1 is used
sanger_thymus__1523	Thymus	SANGER_@Thymus	ti.o	21921910	EMBL-EBI ENA	ERP000591	ERR032218_1	only read 1 is used
sanger_thymus__1524	Thymus	SANGER_@Thymus	ti.o	21921910	EMBL-EBI ENA	ERP000591	ERR032219_1	only read 1 is used
sanger_thymus__1525	Thymus	SANGER_@Thymus	ti.o	21921910	EMBL-EBI ENA	ERP000591	ERR032220_1	only read 1 is used
