# Supplementary figures and images for: Mapping the transcriptional diversity of genetically and anatomically defined cell populations in the mouse brain
Source: eLife journal article supplement (doi:10.7554/elife.38619), 2019-04-12

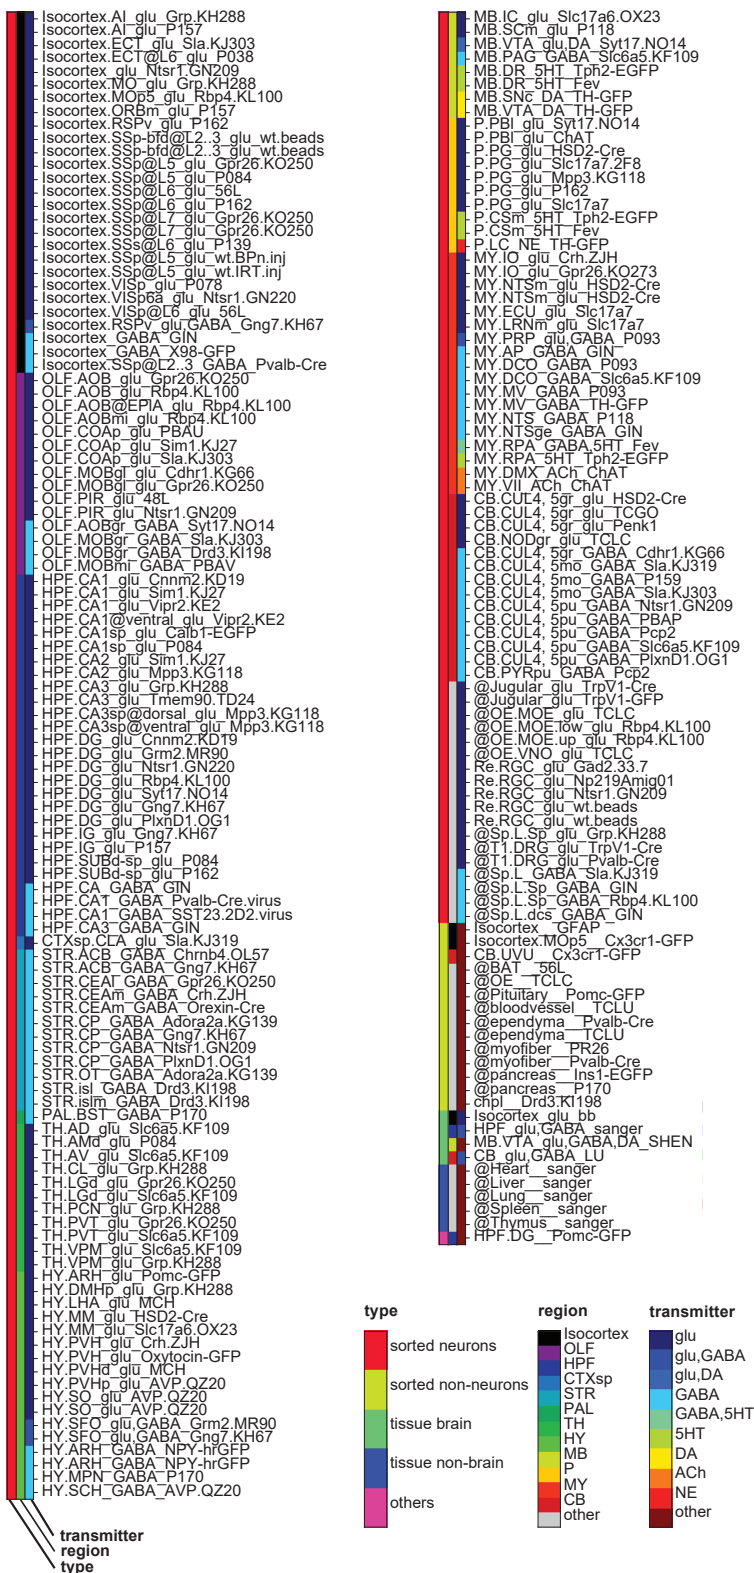

Supplement: supp [file elife-38619-supp-v1.zip]

A

## Tasic 2018 by Paul 2017

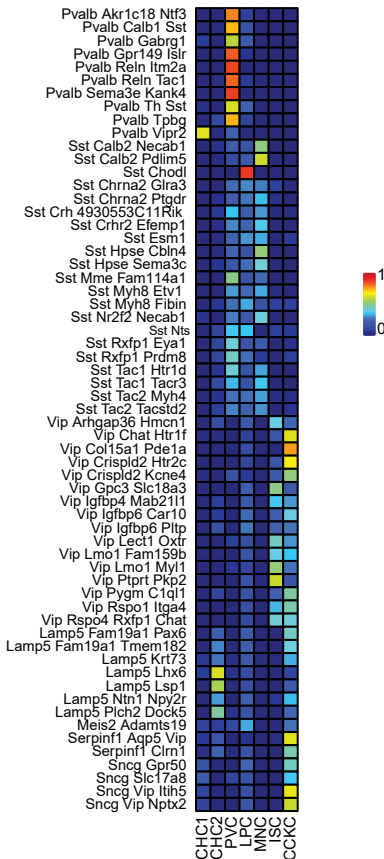

B

## Zeisel 2018 by Paul 2017

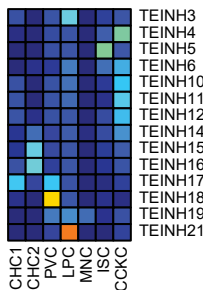

C

## NeuroSeq by Paul 2017

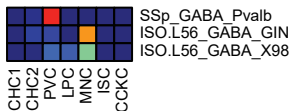

D

## Paul 2017 by Zeisel 2018

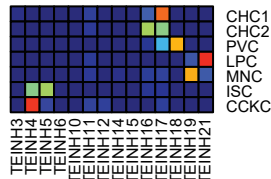

E

## Paul 2017 by Tasic 2018

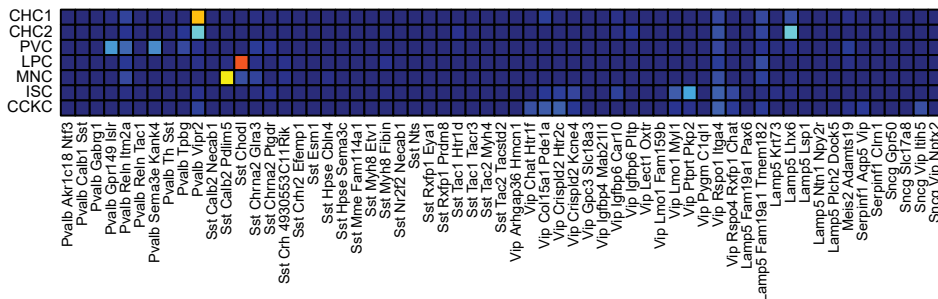

Supplement: supp [file elife-38619-supp-v1.zip]

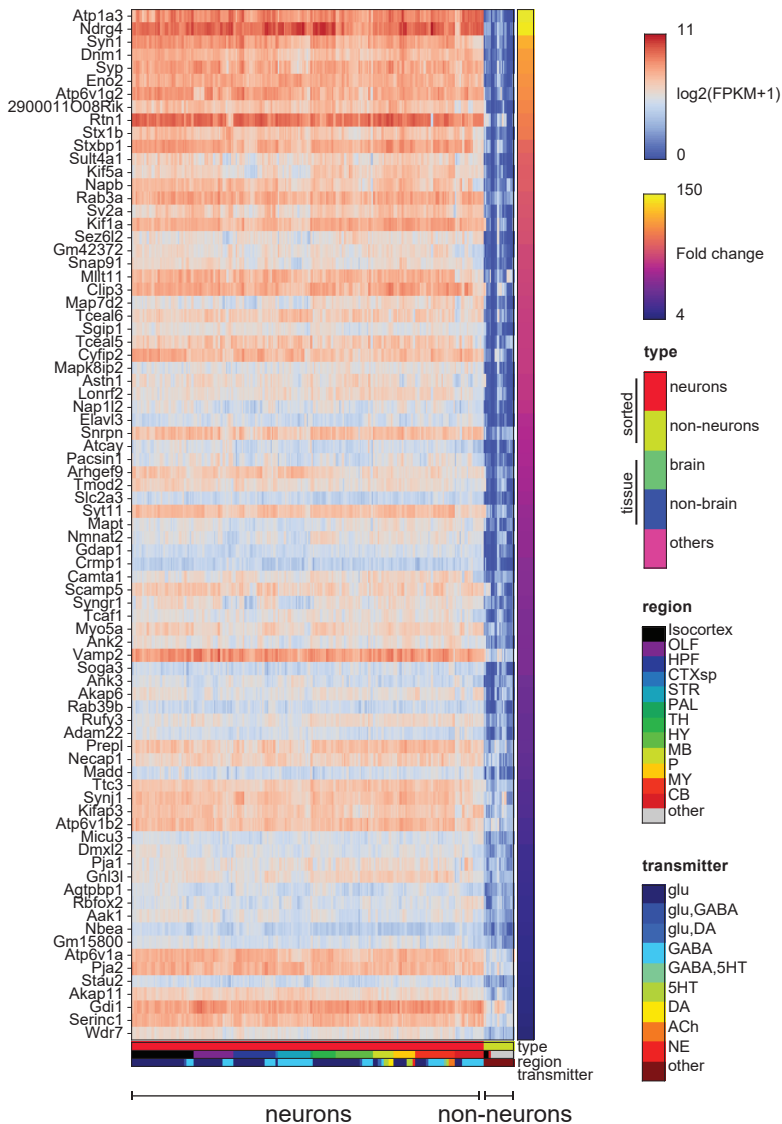

Supplement: supp [file elife-38619-supp-v1.zip]

A Tasic 2018

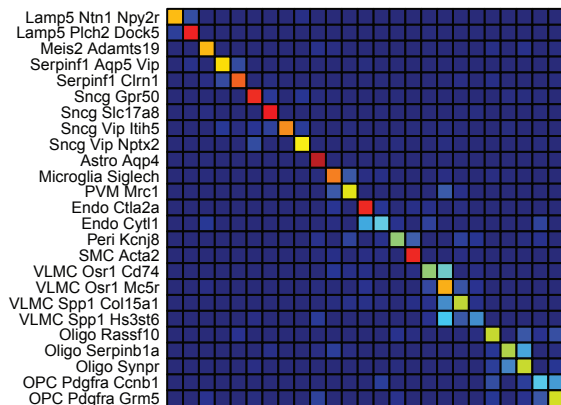

B Zeisel 2018

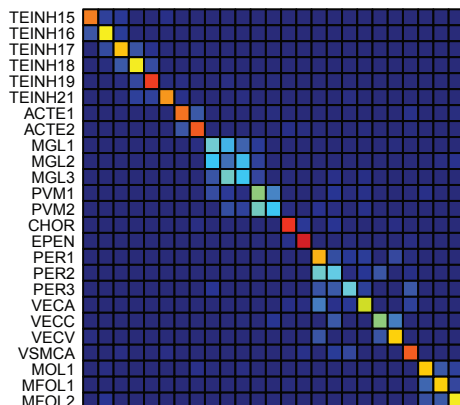

C NeuroSeq

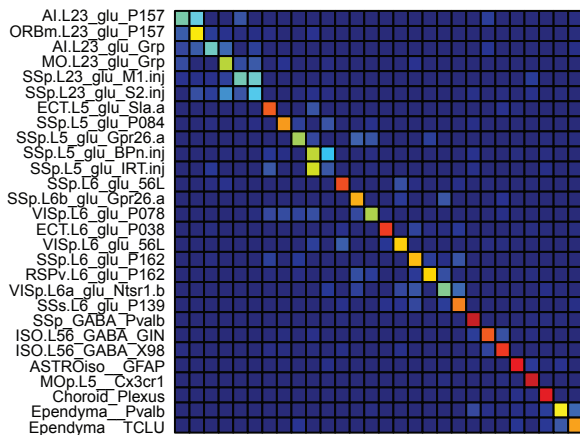

D Mean Purity Scores

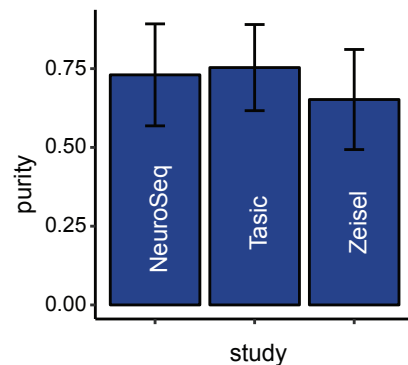

Supplement: supp [file elife-38619-supp-v1.zip]

# NNLS Tasic 2018 by Zeisel 2018

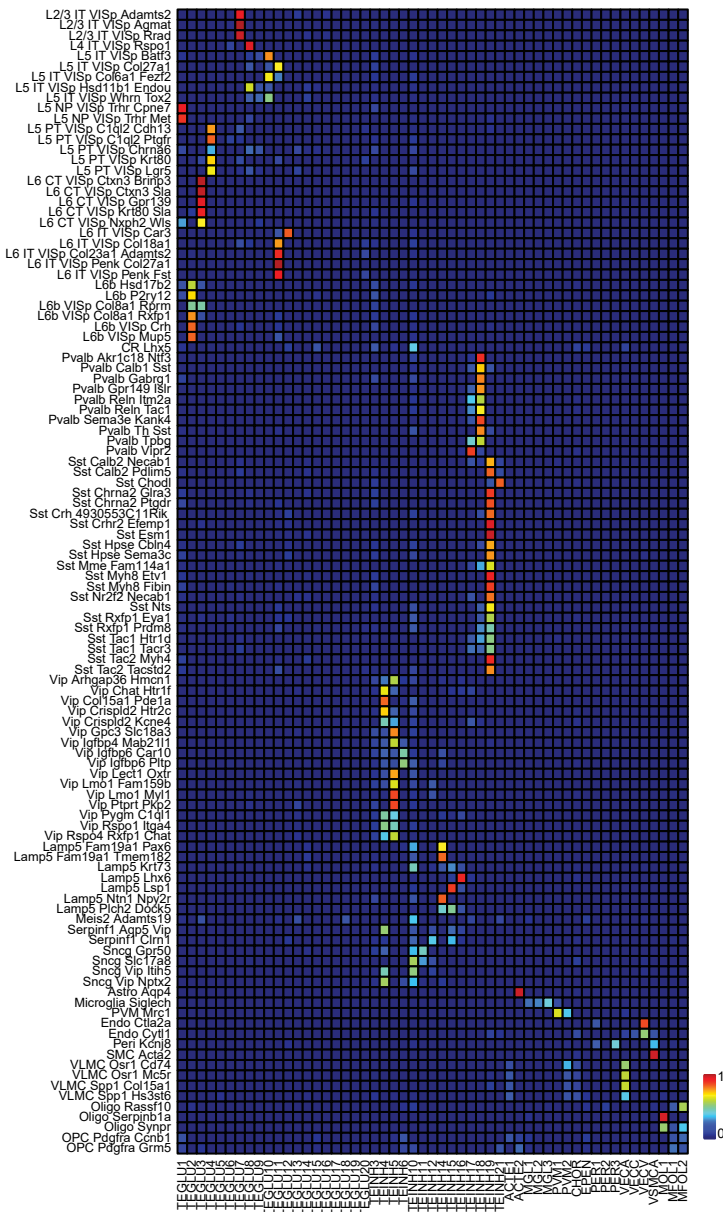

Supplement: supp [file elife-38619-supp-v1.zip]

## NNLS Zeisel 2018 by Tasic 2018

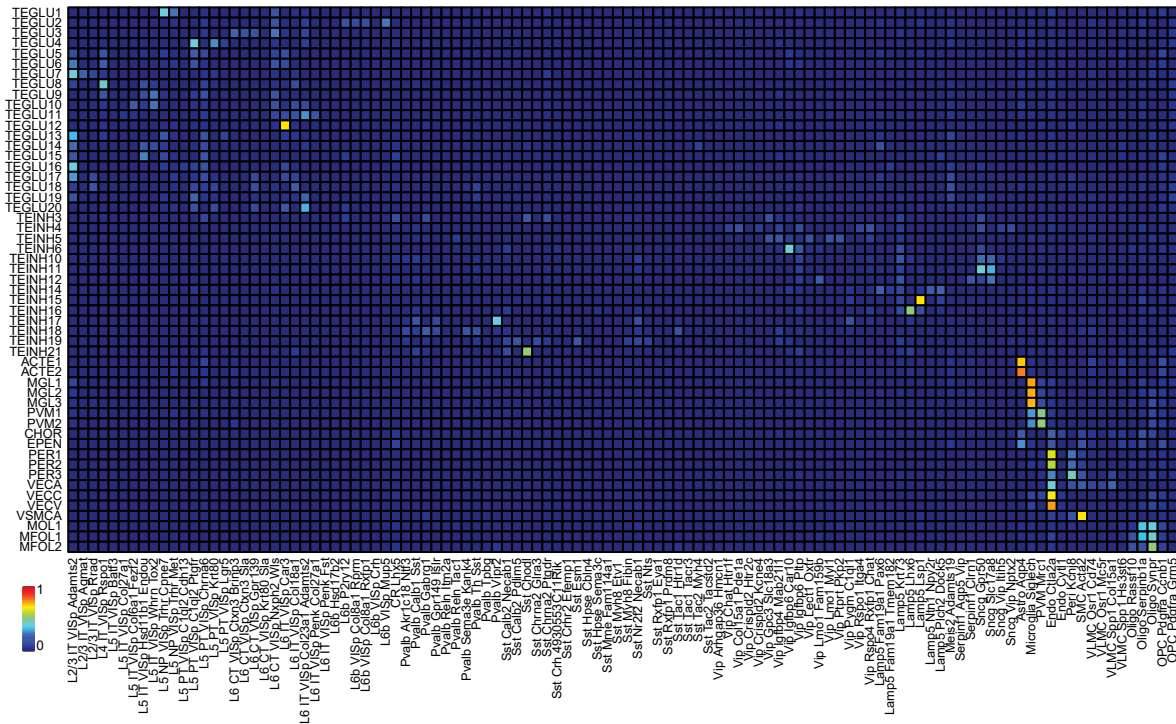

Supplement: supp [file elife-38619-supp-v1.zip]

A

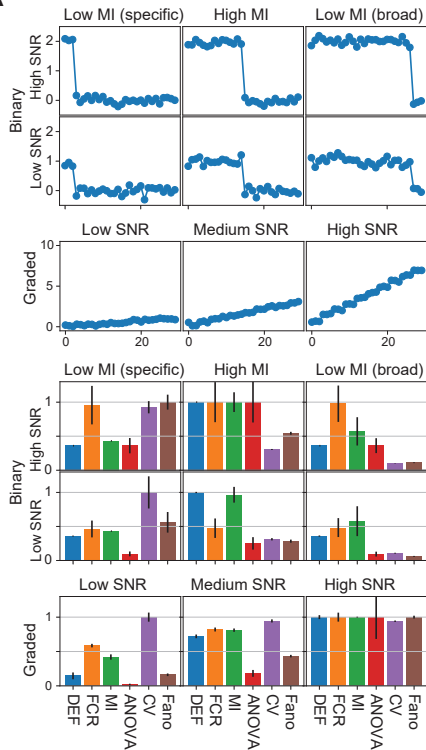

B

|            | Mutual Information | SNR |
|------------|--------------------|-----|
| DEF        | ✓                  | ✗   |
| FCR        | ✗                  | ✓   |
| MI         | ✓                  | ✗   |
| ANOVA      | △                  | △   |
| CV         | ✗                  | ✗   |
| Fano (VMR) | ✗                  | △   |

C

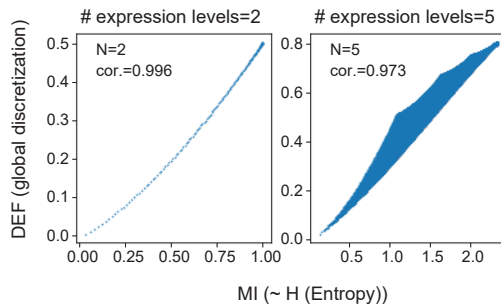

Supplement: supp [file elife-38619-supp-v1.zip]

A

Zeisel 2015

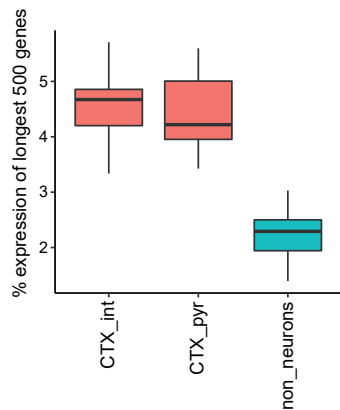

B

Saunders 2018

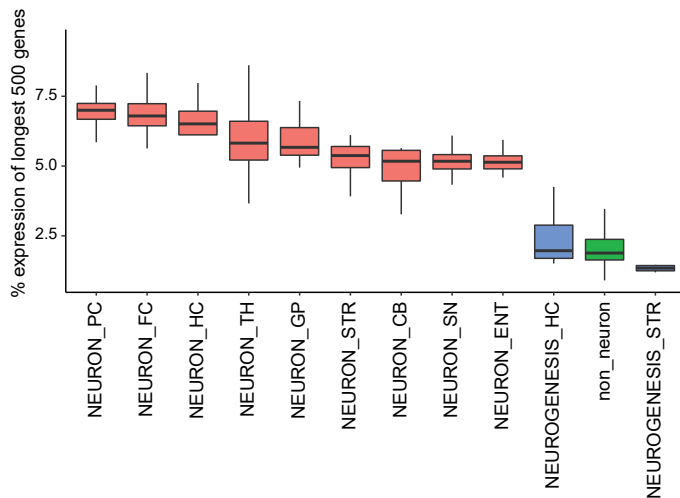

C

Tasic 2016

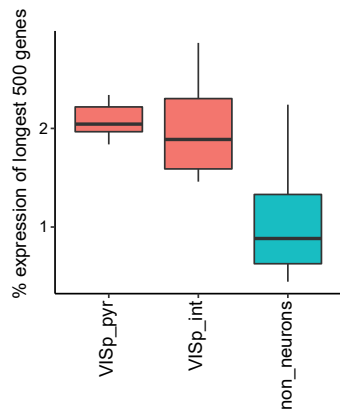

D

Zeisel 2018

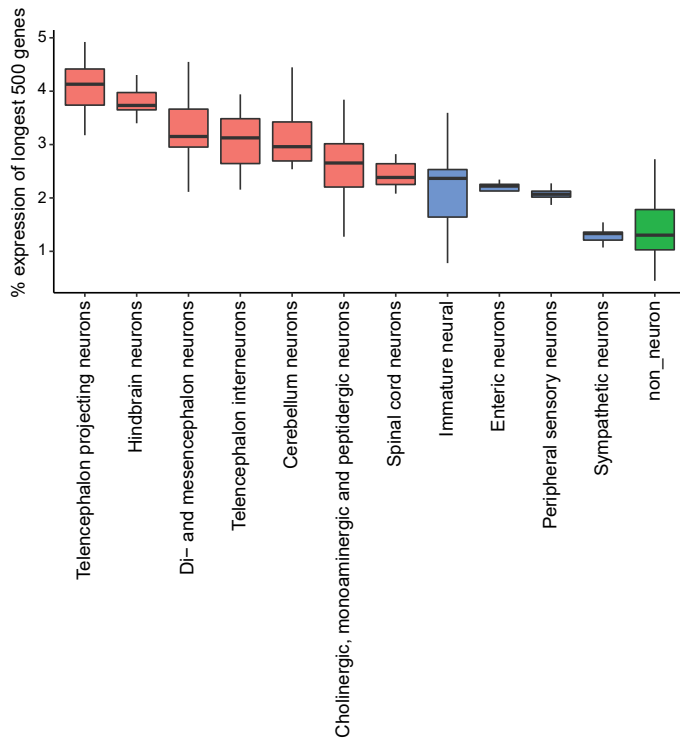

E

Tasic 2018

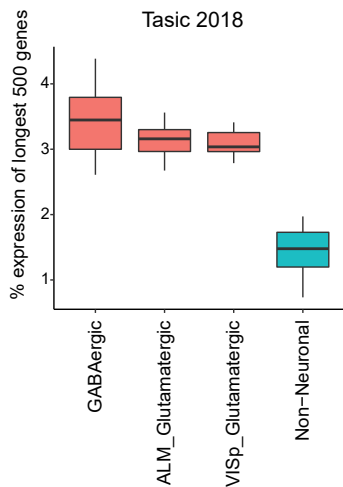

Supplement: supp [file elife-38619-supp-v1.zip]

A

P084\_CA1sp vs. PlxnD1.OG1.Ai\_CUL4..5pu

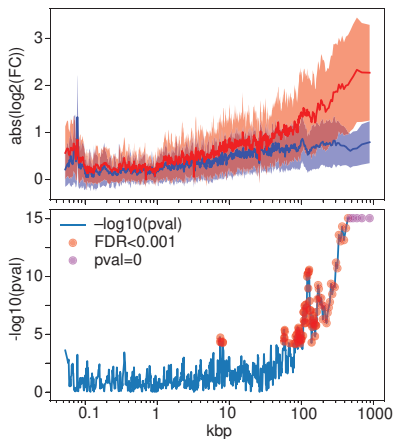

B

PlxnD1.OG1.Ai\_CUL4..5pu vs. P084\_CA1sp

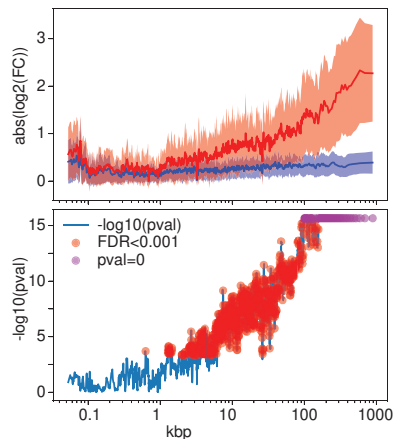

C

Fraction FDR&lt;0.05

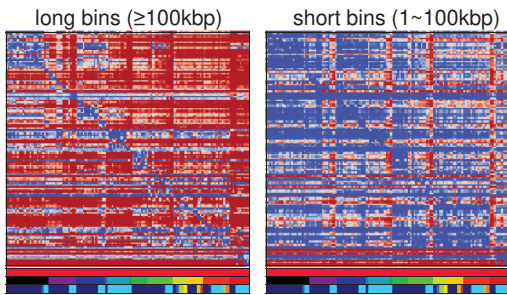

D

proportion of FDR&lt;0.05

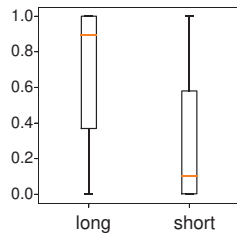

Supplement: supp [file elife-38619-supp-v1.zip]

## A Zeisel 2015

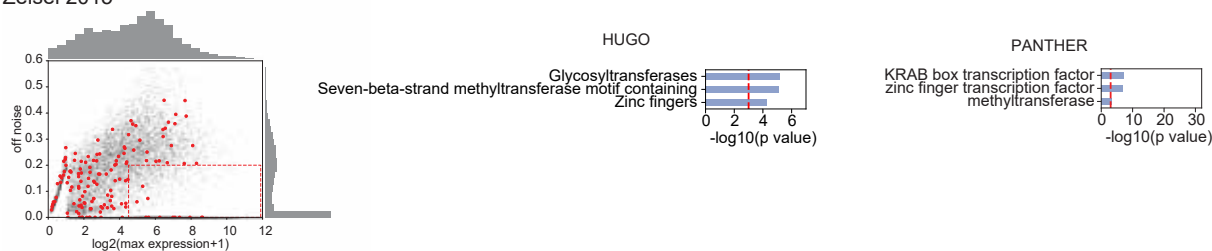

## B Tasic 2016

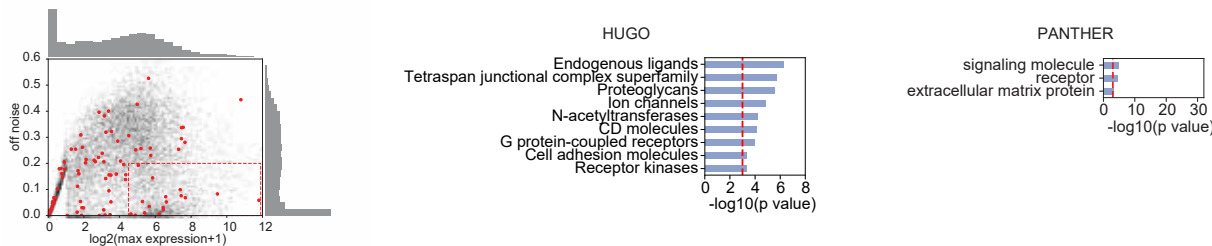

## C Zeisel 2018

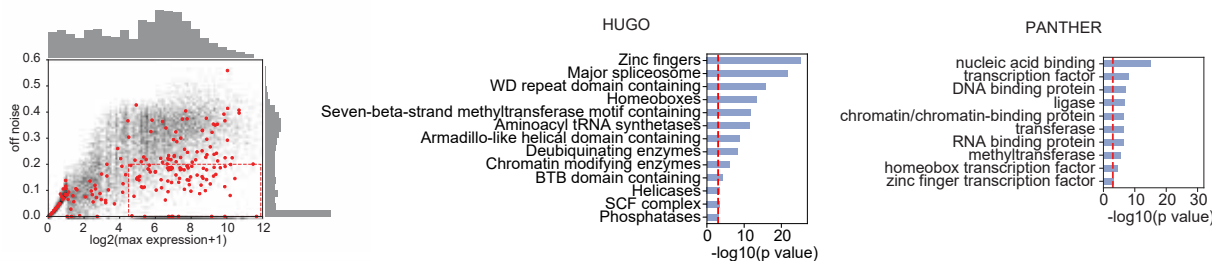

## D Tasic 2018

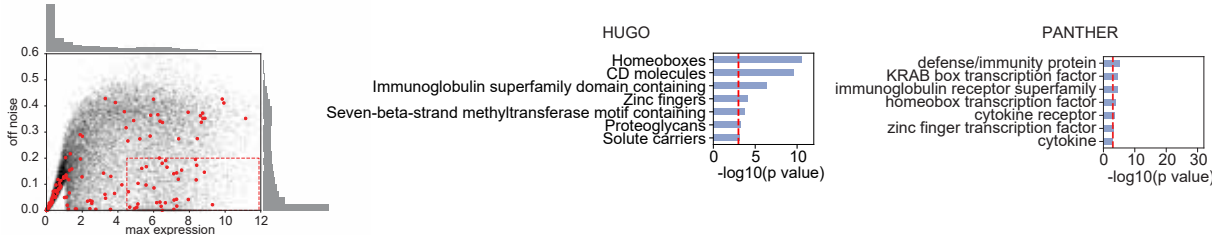

## E Saunders 2018

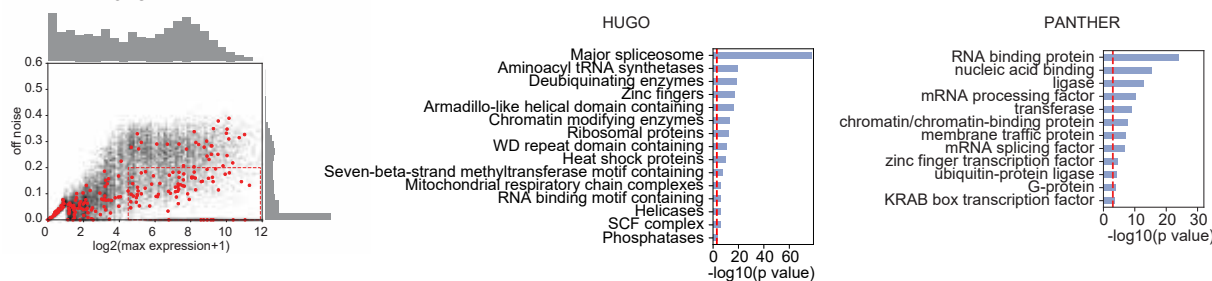

Supplement: supp [file elife-38619-supp-v1.zip]

A

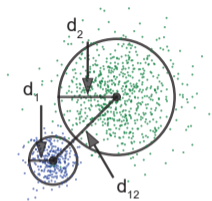

$$\text{separability} = \frac{d_{12}}{d_1 + d_2}$$

$$d_i = \text{mean} + 3\sigma$$

B

## Separability of clusters

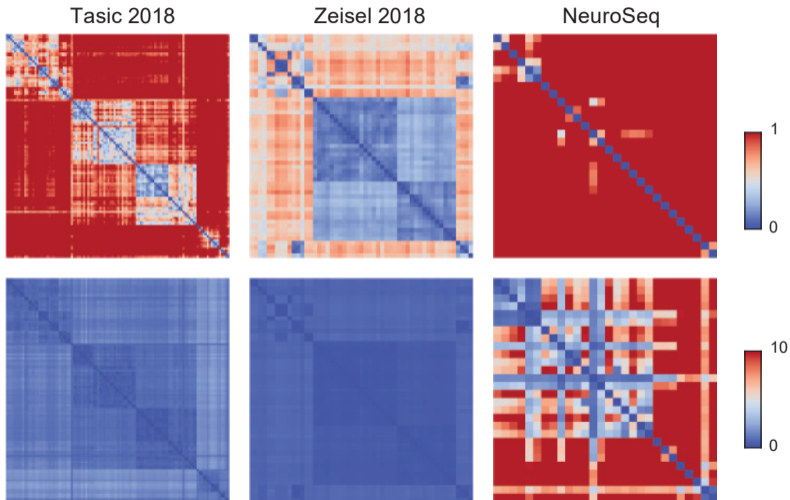

Supplement: supp [file elife-38619-supp-v1.zip › elife_poa_e38619_Figure_2_figure_supplement_7.pdf]

## Random Forest Classifier

NeuroSeq by Tasic 2018

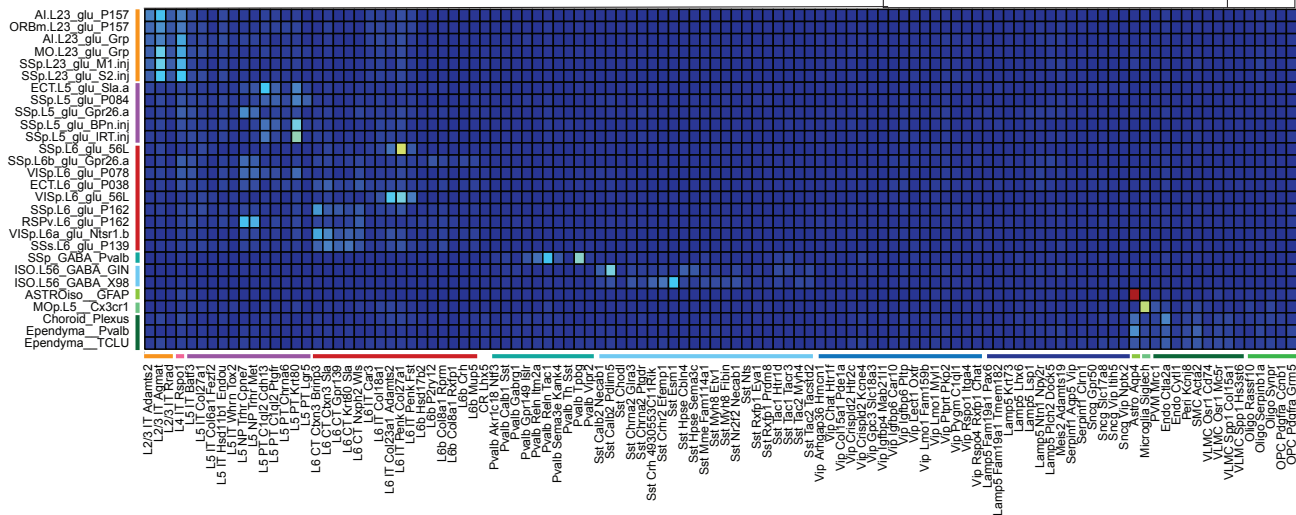

B

NeuroSeq by Zeisel 2018

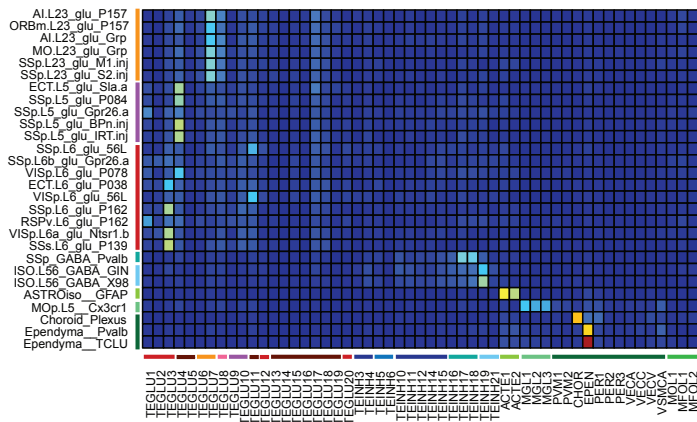

C

### Mean Purity Scores

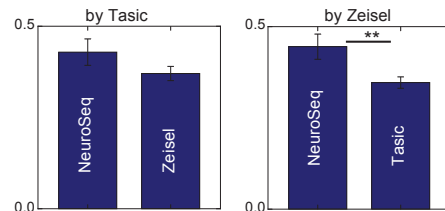

Supplement: supp [file elife-38619-supp-v1.zip › elife_poa_e38619_Figure_2_figure_supplement_6.pdf]

A

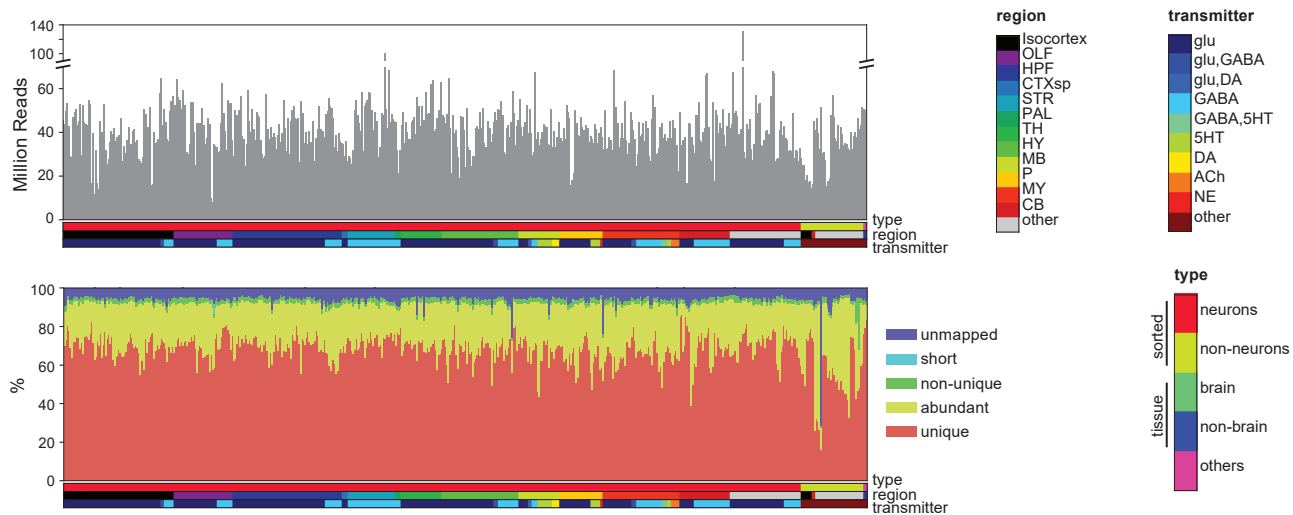

B

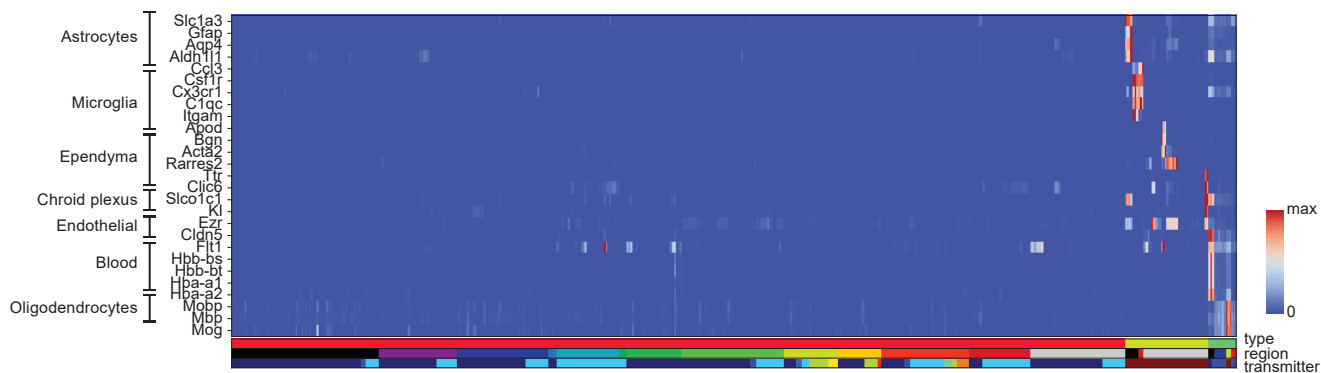

Supplement: supp [file elife-38619-supp-v1.zip › elife_poa_e38619_Figure_1_figure_supplement_2.pdf]

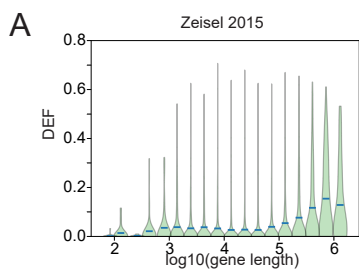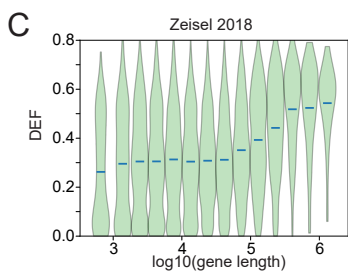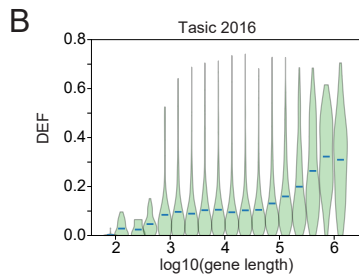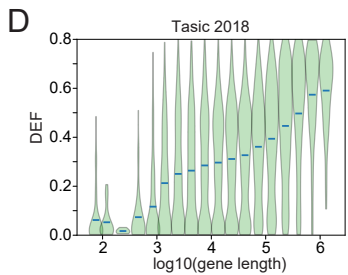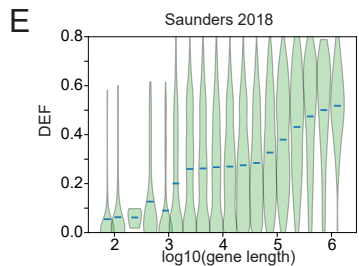

Supplement: supp [file elife-38619-supp-v1.zip › elife_poa_e38619_Figure_7_figure_supplement_1.pdf]

A

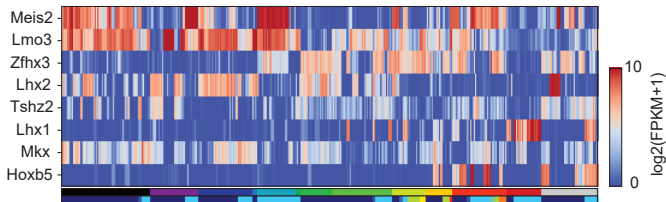

B

Homeobox mincode cumulative DM

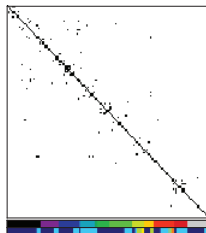

Homeobox(all) cumulative DM

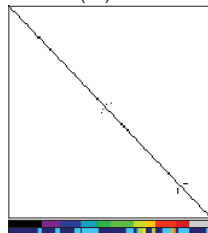

C

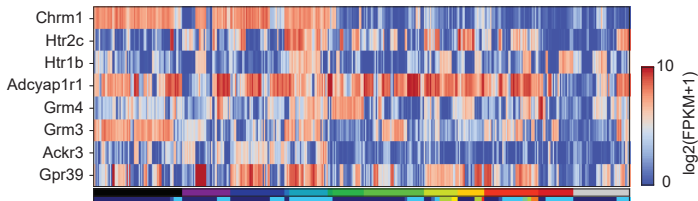

Supplement: supp [file elife-38619-supp-v1.zip › elife_poa_e38619_Figure_5_figure_supplement_2.pdf]
